# Supplementary material for: Thermal Decomposition Behaviour of Foundry Sand for Cast Steel in Nitrogen and Air Atmospheres
Source: Hindawi journal article supplement (doi:10.1155/2020/8121276), 2020-06-17
Supplement: f1 [file 8121276.f1.xls]

## Sheet: FS-N2-20
	Atmosphere: Nitrogen			Material: Foundry sand
	Heating rate: 20 ℃/min
Temp./℃	DSC/(mW/mg)	Mass/%	DTG/(%/min)	DTG/(%/℃)
40	0.022896	100.016	0.0071444	0.00035722
41	0.026018	100.016	0.0079757	0.000398785
42	0.029245	100.021	0.0062359	0.000311795
43	0.031881	100.017	0.0055422	0.00027711
44	0.034148	100.016	0.0052244	0.00026122
45	0.036363	100.018	0.0045239	0.000226195
46	0.039036	100.023	0.0030736	0.00015368
47	0.041092	100.02	0.0033125	0.000165625
48	0.04358	100.016	0.0029505	0.000147525
49	0.045575	100.017	0.0028477	0.000142385
50	0.047568	100.015	0.002218	0.0001109
51	0.049302	100.018	0.001385	6.925e-05
52	0.051169	100.019	0.00092821	4.64105e-05
53	0.052778	100.024	0.00031132	1.5566e-05
54	0.054848	100.021	-0.00098093	-4.90465e-05
55	0.056979	100.016	-0.0012164	-6.082e-05
56	0.058112	100.021	-0.0007592	-3.796e-05
57	0.05979	100.021	-0.00090514	-4.5257e-05
58	0.061513	100.024	-0.0011851	-5.9255e-05
59	0.063423	100.024	-0.0016787	-8.3935e-05
60	0.064722	100.026	-0.0012793	-6.3965e-05
61	0.066281	100.026	-0.0015516	-7.758e-05
62	0.067629	100.03	-0.0012224	-6.112e-05
63	0.068918	100.024	-0.0016022	-8.011e-05
64	0.070137	100.024	-0.0019717	-9.8585e-05
65	0.071744	100.021	-0.0019613	-9.8065e-05
66	0.073152	100.021	-0.0022833	-0.000114165
67	0.074691	100.016	-0.0026173	-0.000130865
68	0.07556	100.018	-0.002921	-0.00014605
69	0.077115	100.021	-0.0036157	-0.000180785
70	0.078069	100.021	-0.0036187	-0.000180935
71	0.079049	100.018	-0.0036187	-0.000180935
72	0.080583	100.021	-0.0036231	-0.000181155
73	0.081614	100.017	-0.0039474	-0.00019737
74	0.082516	100.019	-0.0044129	-0.000220645
75	0.083957	100.016	-0.0055044	-0.00027522
76	0.085202	100.016	-0.0061623	-0.000308115
77	0.086226	100.013	-0.006217	-0.00031085
78	0.087391	100.01	-0.0061503	-0.000307515
79	0.08844	100.01	-0.0068323	-0.000341615
80	0.089366	100.013	-0.0068456	-0.00034228
81	0.090213	100.018	-0.007065	-0.00035325
82	0.091441	100.013	-0.0074908	-0.00037454
83	0.092468	100.013	-0.0071785	-0.000358925
84	0.093998	100.013	-0.0072269	-0.000361345
85	0.094519	100.013	-0.0075503	-0.000377515
86	0.095555	100.013	-0.0081138	-0.00040569
87	0.096409	100.013	-0.0084632	-0.00042316
88	0.097057	100.015	-0.0088528	-0.00044264
89	0.098046	100.011	-0.0095377	-0.000476885
90	0.098961	100.011	-0.0096326	-0.00048163
91	0.099391	100.008	-0.0096854	-0.00048427
92	0.10051	100.005	-0.010163	-0.00050815
93	0.10135	100.008	-0.010936	-0.0005468
94	0.10163	100.005	-0.010942	-0.0005471
95	0.10259	100.006	-0.011403	-0.00057015
96	0.10329	100.006	-0.011783	-0.00058915
97	0.10395	100.003	-0.011835	-0.00059175
98	0.10453	100.003	-0.011861	-0.00059305
99	0.10543	100	-0.011862	-0.0005931
100	0.1067	99.9942	-0.012156	-0.0006078
101	0.10698	99.9947	-0.01258	-0.000629
102	0.10782	99.9947	-0.01253	-0.0006265
103	0.10813	99.9945	-0.012632	-0.0006316
104	0.1086	99.9922	-0.013141	-0.00065705
105	0.10903	99.9934	-0.013458	-0.0006729
106	0.10993	99.9947	-0.014021	-0.00070105
107	0.11051	99.9977	-0.014179	-0.00070895
108	0.11138	99.9998	-0.014481	-0.00072405
109	0.11183	99.9947	-0.014458	-0.0007229
110	0.11221	99.9947	-0.014335	-0.00071675
111	0.1126	99.9947	-0.014567	-0.00072835
112	0.11306	99.9952	-0.014667	-0.00073335
113	0.11338	99.9894	-0.0149	-0.000745
114	0.11415	99.9894	-0.014991	-0.00074955
115	0.11465	99.9889	-0.015264	-0.0007632
116	0.11502	99.992	-0.015689	-0.00078445
117	0.1156	99.9921	-0.016306	-0.0008153
118	0.11603	99.9921	-0.016564	-0.0008282
119	0.11643	99.9921	-0.01743	-0.0008715
120	0.11655	99.9895	-0.017948	-0.0008974
121	0.11673	99.9894	-0.018244	-0.0009122
122	0.11695	99.9894	-0.018438	-0.0009219
123	0.11748	99.992	-0.019093	-0.00095465
124	0.11778	99.9923	-0.019403	-0.00097015
125	0.11815	99.9894	-0.019569	-0.00097845
126	0.11811	99.9893	-0.019952	-0.0009976
127	0.11817	99.9868	-0.020134	-0.0010067
128	0.1186	99.9868	-0.020235	-0.00101175
129	0.11869	99.9868	-0.020374	-0.0010187
130	0.11886	99.9868	-0.020563	-0.00102815
131	0.11979	99.984	-0.02065	-0.0010325
132	0.12044	99.9841	-0.020975	-0.00104875
133	0.12082	99.9841	-0.021054	-0.0010527
134	0.12121	99.9835	-0.020732	-0.0010366
135	0.12185	99.9815	-0.020871	-0.00104355
136	0.12184	99.9815	-0.021142	-0.0010571
137	0.12233	99.9798	-0.020851	-0.00104255
138	0.12262	99.9788	-0.02102	-0.001051
139	0.12317	99.9782	-0.021311	-0.00106555
140	0.12297	99.9736	-0.021985	-0.00109925
141	0.12381	99.9736	-0.022227	-0.00111135
142	0.12444	99.9736	-0.022041	-0.00110205
143	0.12568	99.9736	-0.022498	-0.0011249
144	0.12672	99.9736	-0.022697	-0.00113485
145	0.12733	99.9736	-0.022535	-0.00112675
146	0.12713	99.9736	-0.02293	-0.0011465
147	0.12704	99.9683	-0.0233	-0.001165
148	0.12698	99.9682	-0.023394	-0.0011697
149	0.1269	99.9656	-0.023444	-0.0011722
150	0.12719	99.9657	-0.023363	-0.00116815
151	0.12753	99.963	-0.023435	-0.00117175
152	0.12741	99.9578	-0.023766	-0.0011883
153	0.12726	99.9577	-0.024086	-0.0012043
154	0.12682	99.955	-0.024113	-0.00120565
155	0.12697	99.9553	-0.02465	-0.0012325
156	0.12746	99.9524	-0.024929	-0.00124645
157	0.12675	99.9524	-0.025156	-0.0012578
158	0.12696	99.9524	-0.025329	-0.00126645
159	0.12684	99.9526	-0.025369	-0.00126845
160	0.12729	99.9497	-0.025642	-0.0012821
161	0.12747	99.9497	-0.025695	-0.00128475
162	0.12752	99.9498	-0.025999	-0.00129995
163	0.12727	99.9446	-0.026195	-0.00130975
164	0.12687	99.9445	-0.026055	-0.00130275
165	0.12686	99.9445	-0.026216	-0.0013108
166	0.127	99.9444	-0.026626	-0.0013313
167	0.12723	99.9393	-0.026312	-0.0013156
168	0.12729	99.9335	-0.026872	-0.0013436
169	0.12745	99.9339	-0.026823	-0.00134115
170	0.12724	99.9339	-0.026778	-0.0013389
171	0.12657	99.9312	-0.027159	-0.00135795
172	0.12643	99.9312	-0.027216	-0.0013608
173	0.1262	99.9312	-0.026949	-0.00134745
174	0.12715	99.9312	-0.027206	-0.0013603
175	0.12651	99.9312	-0.027461	-0.00137305
176	0.12644	99.9309	-0.026993	-0.00134965
177	0.12665	99.9259	-0.026827	-0.00134135
178	0.12719	99.9259	-0.027099	-0.00135495
179	0.12719	99.9259	-0.027185	-0.00135925
180	0.12721	99.9232	-0.027007	-0.00135035
181	0.12785	99.918	-0.026858	-0.0013429
182	0.12833	99.9153	-0.027117	-0.00135585
183	0.12898	99.9154	-0.027232	-0.0013616
184	0.12899	99.9154	-0.02781	-0.0013905
185	0.12861	99.9127	-0.028167	-0.00140835
186	0.12831	99.9127	-0.028226	-0.0014113
187	0.12808	99.9129	-0.028226	-0.0014113
188	0.12783	99.9101	-0.028223	-0.00141115
189	0.12773	99.9101	-0.027926	-0.0013963
190	0.12756	99.9075	-0.027514	-0.0013757
191	0.12757	99.9074	-0.027523	-0.00137615
192	0.12747	99.9036	-0.027904	-0.0013952
193	0.12763	99.9022	-0.028236	-0.0014118
194	0.12748	99.8994	-0.028226	-0.0014113
195	0.1277	99.8968	-0.02826	-0.001413
196	0.12797	99.8943	-0.028526	-0.0014263
197	0.12869	99.8915	-0.028437	-0.00142185
198	0.12926	99.8889	-0.028357	-0.00141785
199	0.1289	99.8889	-0.028597	-0.00142985
200	0.12835	99.8808	-0.029284	-0.0014642
201	0.12829	99.881	-0.029677	-0.00148385
202	0.12748	99.8783	-0.029446	-0.0014723
203	0.12742	99.8783	-0.029445	-0.00147225
204	0.12733	99.8756	-0.029556	-0.0014778
205	0.12756	99.8757	-0.029325	-0.00146625
206	0.12763	99.8757	-0.029312	-0.0014656
207	0.12741	99.8757	-0.029312	-0.0014656
208	0.12752	99.8757	-0.029312	-0.0014656
209	0.12747	99.8757	-0.029312	-0.0014656
210	0.12741	99.8762	-0.029312	-0.0014656
211	0.12733	99.8704	-0.029322	-0.0014661
212	0.12738	99.8704	-0.029553	-0.00147765
213	0.12717	99.8709	-0.029677	-0.00148385
214	0.12742	99.8651	-0.029989	-0.00149945
215	0.1273	99.8651	-0.030598	-0.0015299
216	0.12789	99.8651	-0.030549	-0.00152745
217	0.1277	99.8651	-0.030639	-0.00153195
218	0.12702	99.8619	-0.030259	-0.00151295
219	0.12668	99.8598	-0.030401	-0.00152005
220	0.12639	99.8598	-0.030633	-0.00153165
221	0.1264	99.8578	-0.030759	-0.00153795
222	0.12634	99.8545	-0.030985	-0.00154925
223	0.12608	99.8545	-0.031458	-0.0015729
224	0.12573	99.8519	-0.031483	-0.00157415
225	0.12583	99.8472	-0.031275	-0.00156375
226	0.12549	99.8465	-0.030785	-0.00153925
227	0.12531	99.8439	-0.030573	-0.00152865
228	0.12525	99.844	-0.030395	-0.00151975
229	0.12509	99.8414	-0.030194	-0.0015097
230	0.12488	99.8414	-0.029865	-0.00149325
231	0.12476	99.8386	-0.0299	-0.001495
232	0.12439	99.8386	-0.029989	-0.00149945
233	0.12456	99.8366	-0.030164	-0.0015082
234	0.12511	99.8364	-0.030189	-0.00150945
235	0.12476	99.8307	-0.030037	-0.00150185
236	0.12468	99.8278	-0.030035	-0.00150175
237	0.12444	99.8281	-0.030033	-0.00150165
238	0.1244	99.828	-0.029867	-0.00149335
239	0.12414	99.8254	-0.029678	-0.0014839
240	0.12442	99.8254	-0.029674	-0.0014837
241	0.1244	99.8217	-0.029584	-0.0014792
242	0.12465	99.8201	-0.029043	-0.00145215
243	0.12485	99.8201	-0.028963	-0.00144815
244	0.12463	99.82	-0.029384	-0.0014692
245	0.12428	99.8148	-0.029653	-0.00148265
246	0.12444	99.8149	-0.029165	-0.00145825
247	0.12424	99.8097	-0.028404	-0.0014202
248	0.12301	99.8095	-0.028276	-0.0014138
249	0.12226	99.8095	-0.028708	-0.0014354
250	0.11991	99.8037	-0.02875	-0.0014375
251	0.12003	99.8042	-0.029259	-0.00146295
252	0.12255	99.8042	-0.029312	-0.0014656
253	0.12361	99.8044	-0.029312	-0.0014656
254	0.12389	99.7989	-0.02931	-0.0014655
255	0.12387	99.799	-0.029041	-0.00145205
256	0.12338	99.799	-0.028969	-0.00144845
257	0.12257	99.7964	-0.029306	-0.0014653
258	0.12199	99.7963	-0.02928	-0.001464
259	0.12172	99.7963	-0.028957	-0.00144785
260	0.12164	99.7963	-0.028473	-0.00142365
261	0.12063	99.7963	-0.028038	-0.0014019
262	0.12093	99.7963	-0.027866	-0.0013933
263	0.12076	99.7963	-0.027861	-0.00139305
264	0.11945	99.7935	-0.02768	-0.001384
265	0.11932	99.7884	-0.027505	-0.00137525
266	0.11895	99.7884	-0.027574	-0.0013787
267	0.11847	99.7884	-0.027838	-0.0013919
268	0.11843	99.7884	-0.027853	-0.00139265
269	0.11798	99.7884	-0.027798	-0.0013899
270	0.11812	99.7884	-0.027842	-0.0013921
271	0.11797	99.7854	-0.027461	-0.00137305
272	0.11856	99.7857	-0.027339	-0.00136695
273	0.11826	99.7857	-0.027145	-0.00135725
274	0.1183	99.7857	-0.027089	-0.00135445
275	0.11792	99.7831	-0.026906	-0.0013453
276	0.11768	99.7831	-0.026414	-0.0013207
277	0.11762	99.7832	-0.026262	-0.0013131
278	0.11688	99.7804	-0.026656	-0.0013328
279	0.11681	99.7794	-0.026005	-0.00130025
280	0.11674	99.7751	-0.025629	-0.00128145
281	0.11661	99.7751	-0.025361	-0.00126805
282	0.11647	99.7754	-0.025318	-0.0012659
283	0.11618	99.7725	-0.025077	-0.00125385
284	0.11583	99.7725	-0.02497	-0.0012485
285	0.11554	99.7725	-0.025004	-0.0012502
286	0.11539	99.7725	-0.025274	-0.0012637
287	0.11552	99.7725	-0.025331	-0.00126655
288	0.11544	99.7696	-0.025333	-0.00126665
289	0.11464	99.7699	-0.025287	-0.00126435
290	0.11377	99.7699	-0.024995	-0.00124975
291	0.11368	99.7671	-0.025171	-0.00125855
292	0.11344	99.7646	-0.025115	-0.00125575
293	0.11311	99.7627	-0.024856	-0.0012428
294	0.11269	99.7566	-0.02504	-0.001252
295	0.11243	99.7567	-0.025306	-0.0012653
296	0.11151	99.754	-0.025474	-0.0012737
297	0.11145	99.7535	-0.025323	-0.00126615
298	0.11112	99.7513	-0.025272	-0.0012636
299	0.11078	99.7485	-0.025323	-0.00126615
300	0.11012	99.7487	-0.024936	-0.0012468
301	0.10966	99.749	-0.024611	-0.00123055
302	0.10923	99.7434	-0.024567	-0.00122835
303	0.10907	99.7434	-0.024275	-0.00121375
304	0.10861	99.7434	-0.023763	-0.00118815
305	0.10862	99.7434	-0.023437	-0.00117185
306	0.10812	99.7434	-0.02318	-0.001159
307	0.10796	99.7434	-0.023108	-0.0011554
308	0.10781	99.7434	-0.022833	-0.00114165
309	0.10779	99.7434	-0.02261	-0.0011305
310	0.10769	99.7382	-0.022774	-0.0011387
311	0.10754	99.7382	-0.023138	-0.0011569
312	0.10805	99.7329	-0.022898	-0.0011449
313	0.10881	99.7328	-0.022576	-0.0011288
314	0.10897	99.7328	-0.02282	-0.001141
315	0.10893	99.7328	-0.022848	-0.0011424
316	0.10873	99.7328	-0.023003	-0.00115015
317	0.10872	99.7328	-0.023646	-0.0011823
318	0.10839	99.7328	-0.023557	-0.00117785
319	0.10814	99.7328	-0.023985	-0.00119925
320	0.10793	99.7328	-0.024021	-0.00120105
321	0.10646	99.7328	-0.023884	-0.0011942
322	0.1051	99.7328	-0.023903	-0.00119515
323	0.10451	99.7277	-0.023864	-0.0011932
324	0.1039	99.7275	-0.023602	-0.0011801
325	0.10385	99.7275	-0.023697	-0.00118485
326	0.10352	99.7275	-0.023553	-0.00117765
327	0.10336	99.7278	-0.023868	-0.0011934
328	0.10362	99.7222	-0.024079	-0.00120395
329	0.10339	99.7188	-0.023816	-0.0011908
330	0.10324	99.7169	-0.02397	-0.0011985
331	0.10306	99.7169	-0.024969	-0.00124845
332	0.10186	99.7169	-0.024878	-0.0012439
333	0.10158	99.7169	-0.024609	-0.00123045
334	0.10126	99.7169	-0.024606	-0.0012303
335	0.10058	99.7118	-0.024448	-0.0012224
336	0.10028	99.7117	-0.024319	-0.00121595
337	0.099878	99.7117	-0.024862	-0.0012431
338	0.099837	99.7095	-0.025297	-0.00126485
339	0.099667	99.7116	-0.025685	-0.00128425
340	0.099044	99.7117	-0.025693	-0.00128465
341	0.099242	99.7117	-0.025692	-0.0012846
342	0.098939	99.7117	-0.025495	-0.00127475
343	0.098318	99.7117	-0.025236	-0.0012618
344	0.098172	99.7117	-0.025331	-0.00126655
345	0.097696	99.7059	-0.025331	-0.00126655
346	0.097278	99.7064	-0.025336	-0.0012668
347	0.097165	99.7064	-0.025692	-0.0012846
348	0.096759	99.7037	-0.026094	-0.0013047
349	0.0972	99.7037	-0.026271	-0.00131355
350	0.096767	99.7035	-0.026371	-0.00131855
351	0.096625	99.7011	-0.026585	-0.00132925
352	0.096372	99.6997	-0.026771	-0.00133855
353	0.09622	99.6984	-0.026585	-0.00132925
354	0.096324	99.6984	-0.026593	-0.00132965
355	0.096735	99.6984	-0.026823	-0.00134115
356	0.096056	99.6928	-0.026839	-0.00134195
357	0.095953	99.6932	-0.026933	-0.00134665
358	0.09566	99.6932	-0.026786	-0.0013393
359	0.096403	99.6932	-0.02733	-0.0013665
360	0.096303	99.6932	-0.027436	-0.0013718
361	0.09628	99.6932	-0.027168	-0.0013584
362	0.095991	99.6932	-0.027149	-0.00135745
363	0.096201	99.6932	-0.027545	-0.00137725
364	0.096391	99.6905	-0.027861	-0.00139305
365	0.095774	99.6905	-0.027861	-0.00139305
366	0.095337	99.6905	-0.027937	-0.00139685
367	0.095278	99.6901	-0.028281	-0.00141405
368	0.095249	99.6879	-0.028561	-0.00142805
369	0.094737	99.6862	-0.028503	-0.00142515
370	0.094959	99.6852	-0.028446	-0.0014223
371	0.094412	99.6825	-0.028466	-0.0014233
372	0.0944	99.6825	-0.028023	-0.00140115
373	0.09454	99.6799	-0.028105	-0.00140525
374	0.094283	99.6794	-0.028249	-0.00141245
375	0.094015	99.6773	-0.028497	-0.00142485
376	0.093822	99.6747	-0.028869	-0.00144345
377	0.093368	99.6746	-0.028683	-0.00143415
378	0.093507	99.6746	-0.028968	-0.0014484
379	0.092929	99.6746	-0.029069	-0.00145345
380	0.092262	99.6746	-0.029334	-0.0014667
381	0.090631	99.6746	-0.029979	-0.00149895
382	0.090473	99.6746	-0.030342	-0.0015171
383	0.090196	99.6746	-0.030397	-0.00151985
384	0.090225	99.6746	-0.030397	-0.00151985
385	0.090094	99.6746	-0.030473	-0.00152365
386	0.089842	99.6746	-0.031257	-0.00156285
387	0.089656	99.6746	-0.031334	-0.0015667
388	0.089142	99.6688	-0.031114	-0.0015557
389	0.088846	99.6693	-0.031179	-0.00155895
390	0.0901	99.6693	-0.030919	-0.00154595
391	0.090295	99.6673	-0.031177	-0.00155885
392	0.089853	99.6615	-0.031761	-0.00158805
393	0.089989	99.6614	-0.032229	-0.00161145
394	0.089301	99.6587	-0.032552	-0.0016276
395	0.089004	99.6535	-0.032801	-0.00164005
396	0.088973	99.6537	-0.033096	-0.0016548
397	0.088525	99.645	-0.033617	-0.00168085
398	0.089293	99.6455	-0.033657	-0.00168285
399	0.08982	99.6455	-0.033979	-0.00169895
400	0.089559	99.6458	-0.034076	-0.0017038
401	0.089087	99.6429	-0.033665	-0.00168325
402	0.089084	99.6402	-0.033885	-0.00169425
403	0.088543	99.638	-0.034378	-0.0017189
404	0.088155	99.6361	-0.034629	-0.00173145
405	0.087589	99.6342	-0.034277	-0.00171385
406	0.087624	99.6324	-0.034239	-0.00171195
407	0.087509	99.6296	-0.03395	-0.0016975
408	0.087118	99.6269	-0.034105	-0.00170525
409	0.087241	99.6191	-0.034396	-0.0017198
410	0.087192	99.6191	-0.034715	-0.00173575
411	0.087112	99.6191	-0.035079	-0.00175395
412	0.087018	99.6191	-0.035066	-0.0017533
413	0.087286	99.6191	-0.035382	-0.0017691
414	0.086883	99.6133	-0.035468	-0.0017734
415	0.087012	99.6138	-0.035718	-0.0017859
416	0.08714	99.6085	-0.036063	-0.00180315
417	0.086714	99.6085	-0.036187	-0.00180935
418	0.087136	99.6085	-0.036332	-0.0018166
419	0.086951	99.6085	-0.036892	-0.0018446
420	0.086941	99.6038	-0.037312	-0.0018656
421	0.086746	99.6032	-0.037704	-0.0018852
422	0.086801	99.6032	-0.03764	-0.001882
423	0.086485	99.6032	-0.037647	-0.00188235
424	0.086319	99.6032	-0.037888	-0.0018944
425	0.086012	99.5979	-0.0379	-0.001895
426	0.085823	99.5953	-0.038037	-0.00190185
427	0.085682	99.5927	-0.038179	-0.00190895
428	0.085479	99.5923	-0.038246	-0.0019123
429	0.085335	99.59	-0.038527	-0.00192635
430	0.084814	99.59	-0.038455	-0.00192275
431	0.08456	99.5886	-0.039007	-0.00195035
432	0.084436	99.5875	-0.039	-0.00195
433	0.083862	99.5847	-0.038918	-0.0019459
434	0.08398	99.5821	-0.039426	-0.0019713
435	0.083643	99.5795	-0.039446	-0.0019723
436	0.083547	99.5742	-0.03974	-0.001987
437	0.083371	99.5741	-0.040233	-0.00201165
438	0.083028	99.5741	-0.040539	-0.00202695
439	0.082699	99.5741	-0.041018	-0.0020509
440	0.082784	99.5686	-0.041437	-0.00207185
441	0.082525	99.5688	-0.041331	-0.00206655
442	0.082179	99.5688	-0.041573	-0.00207865
443	0.082126	99.563	-0.041626	-0.0020813
444	0.081568	99.5635	-0.041867	-0.00209335
445	0.081612	99.5609	-0.041977	-0.00209885
446	0.081039	99.5583	-0.041977	-0.00209885
447	0.080732	99.5557	-0.042016	-0.0021008
448	0.080591	99.553	-0.042291	-0.00211455
449	0.079984	99.5502	-0.042154	-0.0021077
450	0.079827	99.5504	-0.042309	-0.00211545
451	0.079611	99.5456	-0.042403	-0.00212015
452	0.07927	99.5419	-0.042364	-0.0021182
453	0.079349	99.5397	-0.042813	-0.00214065
454	0.079105	99.5396	-0.043088	-0.0021544
455	0.079076	99.5344	-0.043369	-0.00216845
456	0.078911	99.5296	-0.043531	-0.00217655
457	0.078721	99.5252	-0.043776	-0.0021888
458	0.078532	99.5224	-0.043872	-0.0021936
459	0.078606	99.5212	-0.044144	-0.0022072
460	0.078275	99.5212	-0.044409	-0.00222045
461	0.078262	99.5212	-0.044625	-0.00223125
462	0.078335	99.5167	-0.044869	-0.00224345
463	0.078583	99.5133	-0.045108	-0.0022554
464	0.078335	99.5104	-0.045373	-0.00226865
465	0.07831	99.5108	-0.045242	-0.0022621
466	0.078124	99.5079	-0.045234	-0.0022617
467	0.078324	99.5053	-0.045104	-0.0022552
468	0.078477	99.5002	-0.0444	-0.00222
469	0.078445	99.4972	-0.044148	-0.0022074
470	0.07865	99.4948	-0.04383	-0.0021915
471	0.078419	99.4938	-0.043254	-0.0021627
472	0.078925	99.492	-0.043674	-0.0021837
473	0.079011	99.4868	-0.043073	-0.00215365
474	0.078843	99.4868	-0.042705	-0.00213525
475	0.079039	99.4873	-0.042701	-0.00213505
476	0.079161	99.4815	-0.042619	-0.00213095
477	0.079295	99.4815	-0.04278	-0.002139
478	0.079678	99.4819	-0.042853	-0.00214265
479	0.079788	99.4762	-0.042504	-0.0021252
480	0.079905	99.4736	-0.042154	-0.0021077
481	0.07966	99.4736	-0.041849	-0.00209245
482	0.079945	99.4709	-0.042104	-0.0021052
483	0.080137	99.4681	-0.04198	-0.002099
484	0.079809	99.4686	-0.041401	-0.00207005
485	0.079948	99.4656	-0.04091	-0.0020455
486	0.080061	99.463	-0.041155	-0.00205775
487	0.079761	99.4604	-0.041373	-0.00206865
488	0.080129	99.4577	-0.041665	-0.00208325
489	0.08024	99.4524	-0.041909	-0.00209545
490	0.080044	99.4524	-0.041557	-0.00207785
491	0.080237	99.4467	-0.041311	-0.00206555
492	0.080024	99.4471	-0.041113	-0.00205565
493	0.080396	99.4471	-0.041253	-0.00206265
494	0.080438	99.4461	-0.041254	-0.0020627
495	0.080492	99.4419	-0.0412	-0.00206
496	0.080329	99.4366	-0.040648	-0.0020324
497	0.080464	99.4342	-0.040536	-0.0020268
498	0.080554	99.4318	-0.040764	-0.0020382
499	0.080728	99.4315	-0.040858	-0.0020429
500	0.080591	99.4286	-0.040331	-0.00201655
501	0.080611	99.426	-0.040033	-0.00200165
502	0.080903	99.4252	-0.040084	-0.0020042
503	0.080564	99.4233	-0.040142	-0.0020071
504	0.080617	99.4181	-0.039861	-0.00199305
505	0.08068	99.418	-0.039806	-0.0019903
506	0.080991	99.4133	-0.039754	-0.0019877
507	0.080883	99.4127	-0.039456	-0.0019728
508	0.080988	99.4127	-0.039187	-0.00195935
509	0.081129	99.4049	-0.039421	-0.00197105
510	0.080892	99.4048	-0.039229	-0.00196145
511	0.08102	99.4047	-0.038681	-0.00193405
512	0.081285	99.3995	-0.038361	-0.00191805
513	0.081077	99.3969	-0.038593	-0.00192965
514	0.081214	99.3943	-0.039063	-0.00195315
515	0.081418	99.3918	-0.038742	-0.0019371
516	0.081196	99.3889	-0.038401	-0.00192005
517	0.081173	99.3861	-0.038929	-0.00194645
518	0.081366	99.3863	-0.038785	-0.00193925
519	0.081414	99.3841	-0.038287	-0.00191435
520	0.081754	99.381	-0.038003	-0.00190015
521	0.081726	99.3781	-0.037725	-0.00188625
522	0.081798	99.3784	-0.037398	-0.0018699
523	0.081961	99.3731	-0.037326	-0.0018663
524	0.081888	99.3731	-0.0371	-0.001855
525	0.08205	99.3735	-0.036912	-0.0018456
526	0.081976	99.3678	-0.036755	-0.00183775
527	0.082131	99.3676	-0.03647	-0.0018235
528	0.082475	99.3627	-0.036194	-0.0018097
529	0.082683	99.3599	-0.036118	-0.0018059
530	0.082594	99.3573	-0.035552	-0.0017776
531	0.08221	99.3573	-0.035081	-0.00175405
532	0.082334	99.3546	-0.034739	-0.00173695
533	0.082358	99.3545	-0.034579	-0.00172895
534	0.082398	99.3519	-0.034684	-0.0017342
535	0.082655	99.3491	-0.034977	-0.00174885
536	0.082501	99.3495	-0.03542	-0.001771
537	0.082613	99.3466	-0.035666	-0.0017833
538	0.0829	99.3437	-0.035453	-0.00177265
539	0.082943	99.3381	-0.035189	-0.00175945
540	0.08307	99.3387	-0.034967	-0.00174835
541	0.083406	99.3387	-0.034675	-0.00173375
542	0.083285	99.3387	-0.034361	-0.00171805
543	0.083919	99.3387	-0.033916	-0.0016958
544	0.083917	99.3387	-0.033969	-0.00169845
545	0.084031	99.3387	-0.033674	-0.0016837
546	0.084363	99.3391	-0.033418	-0.0016709
547	0.084591	99.3334	-0.033101	-0.00165505
548	0.08489	99.3334	-0.032593	-0.00162965
549	0.085304	99.3334	-0.032642	-0.0016321
550	0.085412	99.3334	-0.032785	-0.00163925
551	0.08582	99.3334	-0.03257	-0.0016285
552	0.08618	99.3282	-0.032557	-0.00162785
553	0.086376	99.3281	-0.031778	-0.0015889
554	0.086447	99.3281	-0.03106	-0.001553
555	0.087128	99.3281	-0.030832	-0.0015416
556	0.087782	99.3281	-0.031185	-0.00155925
557	0.088108	99.3228	-0.03107	-0.0015535
558	0.088934	99.3228	-0.030951	-0.00154755
559	0.089205	99.32	-0.030885	-0.00154425
560	0.089972	99.3201	-0.030602	-0.0015301
561	0.090691	99.3175	-0.030249	-0.00151245
562	0.091213	99.3146	-0.030032	-0.0015016
563	0.09156	99.3138	-0.029614	-0.0014807
564	0.092997	99.3122	-0.029313	-0.00146565
565	0.093976	99.3097	-0.029168	-0.0014584
566	0.095631	99.3096	-0.028657	-0.00143285
567	0.097202	99.3069	-0.028897	-0.00144485
568	0.098905	99.3069	-0.0289	-0.001445
569	0.10119	99.3069	-0.028516	-0.0014258
570	0.10502	99.3069	-0.028286	-0.0014143
571	0.11348	99.3069	-0.02784	-0.001392
572	0.13625	99.3069	-0.027483	-0.00137415
573	0.15833	99.3043	-0.027316	-0.0013658
574	0.15553	99.3043	-0.027205	-0.00136025
575	0.14334	99.3043	-0.026914	-0.0013457
576	0.13241	99.3041	-0.026737	-0.00133685
577	0.12284	99.299	-0.026602	-0.0013301
578	0.11448	99.299	-0.0265	-0.001325
579	0.10805	99.299	-0.026337	-0.00131685
580	0.10302	99.299	-0.026268	-0.0013134
581	0.098563	99.299	-0.02573	-0.0012865
582	0.094303	99.299	-0.025679	-0.00128395
583	0.09147	99.2986	-0.025063	-0.00125315
584	0.088761	99.2937	-0.02461	-0.0012305
585	0.086053	99.2937	-0.024593	-0.00122965
586	0.083889	99.2937	-0.024122	-0.0012061
587	0.082412	99.2937	-0.023736	-0.0011868
588	0.08078	99.2885	-0.0237	-0.001185
589	0.079279	99.2884	-0.023202	-0.0011601
590	0.07832	99.2884	-0.022837	-0.00114185
591	0.077353	99.2856	-0.022868	-0.0011434
592	0.076226	99.2831	-0.022875	-0.00114375
593	0.075356	99.2831	-0.023282	-0.0011641
594	0.074821	99.2831	-0.022832	-0.0011416
595	0.074381	99.2831	-0.022409	-0.00112045
596	0.073879	99.2831	-0.021726	-0.0010863
597	0.073683	99.2803	-0.021333	-0.00106665
598	0.073327	99.2805	-0.020991	-0.00104955
599	0.072987	99.2805	-0.02087	-0.0010435
600	0.072304	99.2778	-0.020316	-0.0010158
601	0.072088	99.278	-0.020222	-0.0010111
602	0.072001	99.2752	-0.019633	-0.00098165
603	0.072005	99.2752	-0.019674	-0.0009837
604	0.072106	99.2752	-0.019671	-0.00098355
605	0.071949	99.2752	-0.019497	-0.00097485
606	0.071825	99.2734	-0.019214	-0.0009607
607	0.071786	99.2699	-0.019138	-0.0009569
608	0.071954	99.267	-0.018852	-0.0009426
609	0.072405	99.266	-0.018603	-0.00093015
610	0.072466	99.2651	-0.018377	-0.00091885
611	0.07243	99.2574	-0.018107	-0.00090535
612	0.072285	99.254	-0.017884	-0.0008942
613	0.072143	99.254	-0.017332	-0.0008666
614	0.07231	99.254	-0.01701	-0.0008505
615	0.072217	99.254	-0.017008	-0.0008504
616	0.072521	99.254	-0.017008	-0.0008504
617	0.07245	99.254	-0.017008	-0.0008504
618	0.07238	99.2487	-0.017008	-0.0008504
619	0.072247	99.2487	-0.017008	-0.0008504
620	0.071465	99.2487	-0.017008	-0.0008504
621	0.071105	99.2487	-0.017008	-0.0008504
622	0.071386	99.2487	-0.017008	-0.0008504
623	0.071344	99.2488	-0.017006	-0.0008503
624	0.071344	99.2435	-0.01667	-0.0008335
625	0.071391	99.2434	-0.01625	-0.0008125
626	0.072193	99.2434	-0.015701	-0.00078505
627	0.072203	99.2474	-0.015561	-0.00077805
628	0.072103	99.2487	-0.015605	-0.00078025
629	0.072256	99.2488	-0.01589	-0.0007945
630	0.072596	99.2436	-0.016051	-0.00080255
631	0.072524	99.2434	-0.015942	-0.0007971
632	0.072437	99.2421	-0.015908	-0.0007954
633	0.072587	99.2408	-0.015683	-0.00078415
634	0.072469	99.2408	-0.015801	-0.00079005
635	0.072621	99.2408	-0.015564	-0.0007782
636	0.072799	99.2379	-0.015286	-0.0007643
637	0.072851	99.2382	-0.014995	-0.00074975
638	0.072768	99.2382	-0.014805	-0.00074025
639	0.072537	99.2382	-0.014523	-0.00072615
640	0.072767	99.2381	-0.014436	-0.0007218
641	0.072777	99.2355	-0.014425	-0.00072125
642	0.072766	99.2355	-0.01396	-0.000698
643	0.072859	99.2327	-0.013942	-0.0006971
644	0.072786	99.2329	-0.014112	-0.0007056
645	0.072883	99.2329	-0.01423	-0.0007115
646	0.072456	99.2329	-0.014353	-0.00071765
647	0.072836	99.2302	-0.014121	-0.00070605
648	0.073095	99.2302	-0.014004	-0.0007002
649	0.072759	99.2302	-0.013767	-0.00068835
650	0.072223	99.2302	-0.013783	-0.00068915
651	0.072077	99.228	-0.013409	-0.00067045
652	0.072211	99.2276	-0.013389	-0.00066945
653	0.072094	99.225	-0.013389	-0.00066945
654	0.071938	99.2249	-0.013389	-0.00066945
655	0.071864	99.2249	-0.013389	-0.00066945
656	0.071875	99.2249	-0.01338	-0.000669
657	0.071537	99.2249	-0.012946	-0.0006473
658	0.071816	99.2249	-0.012752	-0.0006376
659	0.071593	99.2249	-0.013013	-0.00065065
660	0.071661	99.2249	-0.013027	-0.00065135
661	0.072098	99.2249	-0.012868	-0.0006434
662	0.072128	99.2223	-0.012335	-0.00061675
663	0.072239	99.2223	-0.012226	-0.0006113
664	0.072623	99.2223	-0.011934	-0.0005967
665	0.072923	99.2197	-0.011402	-0.0005701
666	0.073076	99.22	-0.011218	-0.0005609
667	0.073278	99.2144	-0.011352	-0.0005676
668	0.07308	99.2143	-0.011565	-0.00057825
669	0.073314	99.2202	-0.011798	-0.0005899
670	0.073585	99.2196	-0.01191	-0.0005955
671	0.073624	99.2196	-0.011627	-0.00058135
672	0.073369	99.2196	-0.01158	-0.000579
673	0.073847	99.2196	-0.01145	-0.0005725
674	0.07314	99.2196	-0.011474	-0.0005737
675	0.073306	99.2196	-0.011665	-0.00058325
676	0.073551	99.2195	-0.011569	-0.00057845
677	0.073857	99.2143	-0.011313	-0.00056565
678	0.073361	99.2143	-0.011186	-0.0005593
679	0.073532	99.2143	-0.010867	-0.00054335
680	0.073581	99.2143	-0.010338	-0.0005169
681	0.073441	99.2143	-0.01006	-0.000503
682	0.073361	99.2143	-0.0097538	-0.00048769
683	0.073256	99.2143	-0.0093527	-0.000467635
684	0.073228	99.2143	-0.0084532	-0.00042266
685	0.073404	99.2143	-0.0077552	-0.00038776
686	0.073547	99.2143	-0.0082371	-0.000411855
687	0.073498	99.2143	-0.008323	-0.00041615
688	0.073675	99.2143	-0.008482	-0.0004241
689	0.073774	99.2143	-0.0090168	-0.00045084
690	0.073342	99.2143	-0.00904	-0.000452
691	0.073728	99.2143	-0.0086212	-0.00043106
692	0.073942	99.2143	-0.0083242	-0.00041621
693	0.073649	99.2144	-0.0083231	-0.000416155
694	0.073361	99.2092	-0.0083231	-0.000416155
695	0.073567	99.2091	-0.0083191	-0.000415955
696	0.073657	99.2091	-0.0080959	-0.000404795
697	0.073454	99.2092	-0.0075223	-0.000376115
698	0.073444	99.2144	-0.0072383	-0.000361915
699	0.073462	99.2143	-0.0072374	-0.00036187
700	0.073205	99.2143	-0.0074129	-0.000370645
701	0.073064	99.2143	-0.0079397	-0.000396985
702	0.072673	99.2115	-0.008175	-0.00040875
703	0.072698	99.2116	-0.007892	-0.0003946
704	0.072475	99.2064	-0.0078851	-0.000394255
705	0.072311	99.2064	-0.0078707	-0.000393535
706	0.07236	99.2064	-0.0076116	-0.00038058
707	0.072571	99.2036	-0.0075993	-0.000379965
708	0.072835	99.2038	-0.0075986	-0.00037993
709	0.072338	99.2038	-0.0074447	-0.000372235
710	0.072654	99.2038	-0.0072405	-0.000362025
711	0.072668	99.2038	-0.0072375	-0.000361875
712	0.07247	99.2038	-0.0071468	-0.00035734
713	0.073277	99.2038	-0.0068711	-0.000343555
714	0.072941	99.2009	-0.0065801	-0.000329005
715	0.072804	99.2046	-0.0060625	-0.000303125
716	0.073128	99.2067	-0.0056352	-0.00028176
717	0.072767	99.2038	-0.0054749	-0.000273745
718	0.073077	99.2037	-0.0057563	-0.000287815
719	0.073237	99.2011	-0.0057892	-0.00028946
720	0.073488	99.2011	-0.0056347	-0.000281735
721	0.073339	99.2012	-0.0055878	-0.00027939
722	0.073245	99.2038	-0.0057871	-0.000289355
723	0.073142	99.202	-0.0057892	-0.00028946
724	0.073486	99.2011	-0.0056773	-0.000283865
725	0.073589	99.2011	-0.0057424	-0.00028712
726	0.07372	99.2011	-0.0055017	-0.000275085
727	0.073817	99.2011	-0.0054281	-0.000271405
728	0.073736	99.2011	-0.0054177	-0.000270885
729	0.074209	99.2011	-0.0049656	-0.00024828
730	0.074451	99.2011	-0.0047049	-0.000235245
731	0.074764	99.201	-0.0047044	-0.00023522
732	0.075096	99.1985	-0.0047044	-0.00023522
733	0.075246	99.1985	-0.0048028	-0.00024014
734	0.075386	99.1985	-0.0050069	-0.000250345
735	0.074913	99.1985	-0.0047339	-0.000236695
736	0.075285	99.1985	-0.0047044	-0.00023522
737	0.07523	99.2011	-0.0046847	-0.000234235
738	0.075317	99.2011	-0.0044087	-0.000220435
739	0.075327	99.2011	-0.0041879	-0.000209395
740	0.075397	99.2013	-0.0039711	-0.000198555
741	0.075187	99.1985	-0.0040453	-0.000202265
742	0.075608	99.1957	-0.0048006	-0.00024003
743	0.075816	99.1958	-0.0054141	-0.000270705
744	0.076382	99.1958	-0.0057863	-0.000289315
745	0.076432	99.1958	-0.0057762	-0.00028881
746	0.07665	99.1958	-0.0053019	-0.000265095
747	0.076898	99.196	-0.0050665	-0.000253325
748	0.077027	99.1905	-0.0050662	-0.00025331
749	0.077185	99.1905	-0.0049508	-0.00024754
750	0.077571	99.1932	-0.0043911	-0.000219555
751	0.077481	99.1932	-0.0043425	-0.000217125
752	0.077788	99.1958	-0.0043425	-0.000217125
753	0.077974	99.1958	-0.0043425	-0.000217125
754	0.078085	99.1958	-0.0043425	-0.000217125
755	0.078952	99.1958	-0.0043425	-0.000217125
756	0.078858	99.1958	-0.0043425	-0.000217125
757	0.078889	99.1985	-0.0043584	-0.00021792
758	0.079275	99.1985	-0.0048288	-0.00024144
759	0.07899	99.1932	-0.0045632	-0.00022816
760	0.079354	99.1932	-0.0043426	-0.00021713
761	0.079891	99.1932	-0.0043425	-0.000217125
762	0.079545	99.1879	-0.0043425	-0.000217125
763	0.079792	99.1879	-0.0043425	-0.000217125
764	0.07992	99.1879	-0.0043338	-0.00021669
765	0.08015	99.1879	-0.0040867	-0.000204335
766	0.080224	99.1879	-0.00393	-0.0001965
767	0.080393	99.1879	-0.0037438	-0.00018719
768	0.080467	99.1879	-0.0039784	-0.00019892
769	0.081143	99.1908	-0.0039806	-0.00019903
770	0.080767	99.1905	-0.0041184	-0.00020592
771	0.081374	99.1905	-0.0046666	-0.00023333
772	0.081181	99.1905	-0.0047044	-0.00023522
773	0.081472	99.1905	-0.0047043	-0.000235215
774	0.081749	99.1905	-0.0046928	-0.00023464
775	0.082188	99.1876	-0.0044338	-0.00022169
776	0.082649	99.1879	-0.0041759	-0.000208795
777	0.082497	99.1853	-0.0033765	-0.000168825
778	0.082069	99.1852	-0.0032568	-0.00016284
779	0.082378	99.1852	-0.0032432	-0.00016216
780	0.08272	99.1852	-0.0029779	-0.000148895
781	0.082744	99.1852	-0.002895	-0.00014475
782	0.082924	99.1852	-0.002895	-0.00014475
783	0.082963	99.1852	-0.002895	-0.00014475
784	0.083116	99.1852	-0.0030785	-0.000153925
785	0.083114	99.185	-0.0035953	-0.000179765
786	0.083374	99.1879	-0.0036954	-0.00018477
787	0.083353	99.1879	-0.0036898	-0.00018449
788	0.08329	99.1935	-0.0040367	-0.000201835
789	0.083444	99.1932	-0.0040104	-0.00020052
790	0.083292	99.1931	-0.0039806	-0.00019903
791	0.083739	99.1905	-0.0038765	-0.000193825
792	0.083782	99.1905	-0.0035218	-0.00017609
793	0.084014	99.1905	-0.0032668	-0.00016334
794	0.084009	99.188	-0.0035451	-0.000177255
795	0.084465	99.1879	-0.0039637	-0.000198185
796	0.08458	99.1879	-0.00373	-0.0001865
797	0.084217	99.1879	-0.0036188	-0.00018094
798	0.08498	99.1852	-0.0035555	-0.000177775
799	0.085148	99.1852	-0.0032778	-0.00016389
800	0.085312	99.1852	-0.0032569	-0.000162845
801	0.085505	99.1852	-0.003267	-0.00016335
802	0.085756	99.1904	-0.0035192	-0.00017596
803	0.085659	99.1905	-0.003417	-0.00017085
804	0.086087	99.1905	-0.0029898	-0.00014949
805	0.086358	99.1905	-0.0025393	-0.000126965
806	0.08694	99.1895	-0.0023244	-0.00011622
807	0.087111	99.1879	-0.0021849	-0.000109245
808	0.087491	99.1879	-0.002449	-0.00012245
809	0.087929	99.1879	-0.0026814	-0.00013407
810	0.088301	99.1879	-0.0028916	-0.00014458
811	0.088292	99.1879	-0.002895	-0.00014475
812	0.088397	99.1882	-0.0028904	-0.00014452
813	0.089201	99.1852	-0.0026676	-0.00013338
814	0.089047	99.1855	-0.0025362	-0.00012681
815	0.08936	99.1826	-0.0021295	-0.000106475
816	0.09002	99.177	-0.0015086	-7.543e-05
817	0.090677	99.1773	-0.0014475	-7.2375e-05
818	0.090987	99.1773	-0.0014475	-7.2375e-05
819	0.091569	99.1826	-0.0014343	-7.1715e-05
820	0.092006	99.1826	-0.0010146	-5.073e-05
821	0.091927	99.1826	-0.0010604	-5.302e-05
822	0.092334	99.1826	-0.0011438	-5.719e-05
823	0.093112	99.1826	-0.0014245	-7.1225e-05
824	0.093388	99.1826	-0.0016287	-8.1435e-05
825	0.093902	99.1826	-0.0021433	-0.000107165
826	0.09461	99.1826	-0.0021712	-0.00010856
827	0.094516	99.1826	-0.0021708	-0.00010854
828	0.094888	99.1826	-0.0019135	-9.5675e-05
829	0.095019	99.1826	-0.0016602	-8.301e-05
830	0.095434	99.1825	-0.001808	-9.04e-05
831	0.095314	99.1774	-0.0015323	-7.6615e-05
832	0.095817	99.1826	-0.0010938	-5.469e-05
833	0.095437	99.1826	-0.0010782	-5.391e-05
834	0.095638	99.1826	-0.00065019	-3.25095e-05
835	0.096137	99.1826	-0.00037792	-1.8896e-05
836	0.095857	99.1826	-0.00064617	-3.23085e-05
837	0.096004	99.1827	-0.00072377	-3.61885e-05
838	0.096378	99.1853	-0.00081469	-4.07345e-05
839	0.09659	99.1853	-0.0012905	-6.4525e-05
840	0.09661	99.18	-0.000786	-3.93e-05
841	0.096976	99.18	-0.00077294	-3.8647e-05
842	0.097291	99.18	-0.0010569	-5.2845e-05
843	0.097678	99.18	-0.0010856	-5.428e-05
844	0.097843	99.18	-0.0010856	-5.428e-05
845	0.097956	99.18	-0.0010994	-5.497e-05
846	0.097891	99.18	-0.001577	-7.885e-05
847	0.098209	99.18	-0.0017514	-8.757e-05
848	0.097958	99.18	-0.0014711	-7.3555e-05
849	0.098374	99.1799	-0.001332	-6.66e-05
850	0.097816	99.1826	-0.0010926	-5.463e-05
851	0.097926	99.1826	-0.0010854	-5.427e-05
852	0.098098	99.1826	-0.00084448	-4.2224e-05
853	0.098472	99.1826	-0.00037443	-1.87215e-05
854	0.098777	99.1826	-0.00036169	-1.80845e-05
855	0.098773	99.1826	-0.00023671	-1.18355e-05
856	0.099411	99.1826	4.1685e-06	2.08425e-07
857	0.099712	99.1768	0.00025245	1.26225e-05
858	0.099495	99.1773	9.7079e-05	4.85395e-06
859	0.099985	99.1744	1.0977e-05	5.4885e-07
860	0.099931	99.1747	0.00012117	6.0585e-06
861	0.10047	99.1755	-0.00047903	-2.39515e-05
862	0.10038	99.1748	-0.0010504	-5.252e-05
863	0.10156	99.1747	-0.00073015	-3.65075e-05
864	0.10256	99.1747	-0.00036611	-1.83055e-05
865	0.10314	99.1776	-0.00036187	-1.80935e-05
866	0.10316	99.1773	-0.00031871	-1.59355e-05
867	0.10358	99.1747	-3.286e-05	-1.643e-06
868	0.10442	99.1747	-5.4682e-09	-2.7341e-10
869	0.10475	99.1747	5.7851e-06	2.89255e-07
870	0.10496	99.1747	0.00023951	1.19755e-05
871	0.10468	99.1771	0.00036173	1.80865e-05
872	0.10496	99.1773	0.00036187	1.80935e-05
873	0.10482	99.1773	0.00036168	1.8084e-05
874	0.10565	99.1774	0.00012331	6.1655e-06
875	0.10537	99.1747	-0.00072807	-3.64035e-05
876	0.10599	99.1773	-0.0010834	-5.417e-05
877	0.10613	99.1799	-0.0010958	-5.479e-05
878	0.10639	99.18	-0.0012487	-6.2435e-05
879	0.10667	99.1826	-0.00078702	-3.9351e-05
880	0.1067	99.1828	-0.00068976	-3.4488e-05
881	0.10703	99.18	-0.00040448	-2.0224e-05
882	0.10725	99.18	-0.00036188	-1.8094e-05
883	0.10723	99.18	-0.00036188	-1.8094e-05
884	0.10797	99.18	-0.00038745	-1.93725e-05
885	0.10887	99.18	-0.00040365	-2.01825e-05
886	0.10901	99.18	-0.00018837	-9.4185e-06
887	0.10984	99.18	0.0002867	1.4335e-05
888	0.11042	99.1842	0.00055812	2.7906e-05
889	0.11042	99.1852	0.0010664	5.332e-05
890	0.11088	99.1852	0.0010831	5.4155e-05
891	0.11159	99.1852	0.00067601	3.38005e-05
892	0.11186	99.1852	2.6729e-05	1.33645e-06
893	0.11189	99.1825	2.682e-05	1.341e-06
894	0.11183	99.1826	0.0003109	1.5545e-05
895	0.11204	99.1826	0.00036188	1.8094e-05
896	0.1118	99.1826	0.00028793	1.43965e-05
897	0.11183	99.1797	1.6373e-05	8.1865e-07
898	0.11235	99.18	0.00014373	7.1865e-06
899	0.11199	99.18	0.00035842	1.7921e-05
900	0.11219	99.1799	0.00036329	1.81645e-05
901	0.11211	99.1852	0.00068307	3.41535e-05
902	0.11222	99.1852	0.00092671	4.63355e-05
903	0.11206	99.1852	0.0011402	5.701e-05
904	0.11245	99.1852	0.00062325	3.11625e-05
905	0.11258	99.1852	0.00036206	1.8103e-05
906	0.11243	99.1852	0.00036175	1.80875e-05
907	0.11279	99.1852	0.0002408	1.204e-05
908	0.1126	99.1848	5.9099e-06	2.95495e-07
909	0.11285	99.1826	-1.0598e-05	-5.299e-07
910	0.1132	99.1826	-0.0002682	-1.341e-05
911	0.11196	99.1767	-0.00035519	-1.77595e-05
912	0.1118	99.1832	0.0003394	1.697e-05
913	0.11104	99.1826	0.0010768	5.384e-05
914	0.11088	99.1826	0.0010856	5.428e-05
915	0.1109	99.1826	0.0010856	5.428e-05
916	0.1106	99.1826	0.0010856	5.428e-05
917	0.11024	99.1826	0.0010856	5.428e-05
918	0.1107	99.1831	0.0010747	5.3735e-05
919	0.11044	99.1773	0.00061384	3.0692e-05
920	0.11126	99.1773	0.00036222	1.8111e-05
921	0.11104	99.1773	0.00034299	1.71495e-05
922	0.11081	99.1773	0.00039825	1.99125e-05
923	0.1111	99.1773	0.00023047	1.15235e-05
924	0.11122	99.1773	2.0434e-07	1.0217e-08
925	0.11145	99.1826	-1.9006e-07	-9.503e-09
926	0.11188	99.1826	-0.00023185	-1.15925e-05
927	0.11217	99.1826	-0.00071008	-3.5504e-05
928	0.11274	99.1853	-0.00072346	-3.6173e-05
929	0.11324	99.1856	-0.00047813	-2.39065e-05
930	0.11336	99.1879	-1.1618e-05	-5.809e-07
931	0.11357	99.1879	0.00012768	6.384e-06
932	0.1145	99.1885	0.00035663	1.78315e-05
933	0.11546	99.1906	0.00029039	1.45195e-05
934	0.11564	99.1854	0.00022382	1.1191e-05
935	0.11592	99.1853	0.00036124	1.8062e-05
936	0.11684	99.1879	0.00052723	2.63615e-05
937	0.11716	99.1879	0.00092471	4.62355e-05
938	0.1178	99.1879	0.0010139	5.0695e-05
939	0.11861	99.1879	0.0012823	6.4115e-05
940	0.11912	99.1879	0.0010989	5.4945e-05
941	0.11938	99.1879	0.0010853	5.4265e-05
942	0.12014	99.1879	0.0010856	5.428e-05
943	0.12035	99.1879	0.00098359	4.91795e-05
944	0.1206	99.1879	0.00071223	3.56115e-05
945	0.1206	99.1879	0.00042533	2.12665e-05
946	0.12112	99.1879	0.00038323	1.91615e-05
947	0.12141	99.1879	0.00047706	2.3853e-05
948	0.12226	99.1826	0.00011066	5.533e-06
949	0.12268	99.1826	-0.00018669	-9.3345e-06
950	0.12293	99.1823	-0.00024778	-1.2389e-05
951	0.12232	99.1825	-0.0002664	-1.332e-05
952	0.12259	99.1826	-0.00020458	-1.0229e-05
953	0.12281	99.1855	0.00030651	1.53255e-05
954	0.12338	99.1852	0.00016214	8.107e-06
955	0.12318	99.1852	0.00020706	1.0353e-05
956	0.12405	99.1852	0.00036125	1.80625e-05
957	0.12379	99.1823	0.00036188	1.8094e-05
958	0.12462	99.1827	0.0003477	1.7385e-05
959	0.12503	99.1853	8.0735e-05	4.03675e-06
960	0.12529	99.1852	-8.8742e-05	-4.4371e-06
961	0.1257	99.1852	-0.00034979	-1.74895e-05
962	0.12565	99.1852	-0.00036187	-1.80935e-05
963	0.12569	99.1852	-0.00036186	-1.8093e-05
964	0.12624	99.1825	-0.00026197	-1.30985e-05
965	0.1266	99.1826	8.6472e-05	4.3236e-06
966	0.12698	99.185	0.00016391	8.1955e-06
967	0.12701	99.1852	0.00016081	8.0405e-06
968	0.12771	99.1852	-0.00010877	-5.4385e-06
969	0.12776	99.1826	-0.00024063	-1.20315e-05
970	0.12811	99.1826	-7.0374e-06	-3.5187e-07
971	0.12786	99.1853	5.5425e-09	2.77125e-10
972	0.1285	99.1852	-4.2693e-06	-2.13465e-07
973	0.12869	99.1853	-0.0003916	-1.958e-05
974	0.12932	99.1905	-0.00072191	-3.60955e-05
975	0.12891	99.1879	-0.00072374	-3.6187e-05
976	0.13013	99.185	-0.00072377	-3.61885e-05
977	0.12966	99.1852	-0.00056623	-2.83115e-05
978	0.12956	99.1852	-2.9481e-05	-1.47405e-06
979	0.13061	99.1853	-1.0386e-06	-5.193e-08
980	0.13017	99.1827	-0.00026148	-1.3074e-05
981	0.13066	99.1826	-0.00020781	-1.03905e-05
982	0.13081	99.1826	0.00033927	1.69635e-05
983	0.13144	99.1826	0.00051975	2.59875e-05
984	0.1317	99.1826	0.0002715	1.3575e-05
985	0.13368	99.1879	-0.00034437	-1.72185e-05
986	0.13313	99.1879	-0.00036188	-1.8094e-05
987	0.13442	99.1879	-0.00036188	-1.8094e-05
988	0.13453	99.1879	-0.00036188	-1.8094e-05
989	0.13461	99.1879	-0.00036187	-1.80935e-05
990	0.13434	99.1879	-0.00030083	-1.50415e-05
991	0.13515	99.1882	0.00027025	1.35125e-05
992	0.13557	99.1826	0.0003378	1.689e-05
993	0.13625	99.1826	-0.00018698	-9.349e-06
994	0.13616	99.1827	-0.0003619	-1.8095e-05
995	0.13663	99.1885	-0.00036188	-1.8094e-05
996	0.13727	99.1826	-0.000371	-1.855e-05
997	0.13647	99.1826	-0.00081863	-4.09315e-05
998	0.13651	99.1826	-0.0010852	-5.426e-05
999	0.13629	99.1774	-0.0011945	-5.9725e-05
1000	0.13679	99.1773	-0.0019985	-9.9925e-05
1001	0.13678	99.1773	-0.0022279	-0.000111395
1002	0.13737	99.1773	-0.0023896	-0.00011948
1003	0.13755	99.1773	-0.0018528	-9.264e-05
1004	0.1371	99.1773	-0.0018851	-9.4255e-05
1005	0.1374	99.1773	-0.0024108	-0.00012054
1006	0.13741	99.1773	-0.0021304	-0.00010652
1007	0.1379	99.1773	-0.0020314	-0.00010157
1008	0.13707	99.1773	-0.0024397	-0.000121985
1009	0.13783	99.1825	-0.0021382	-0.00010691
1010	0.1379	99.1842	-0.002178	-0.0001089
1011	0.13795	99.1852	-0.0025112	-0.00012556
1012	0.13828	99.181	-0.0025923	-0.000129615
1013	0.1378	99.1826	-0.0025333	-0.000126665
1014	0.1379	99.1826	-0.0024807	-0.000124035
1015	0.13867	99.1826	-0.0025158	-0.00012579
1016	0.13668	99.1826	-0.0025331	-0.000126655
1017	0.13692	99.1799	-0.0025313	-0.000126565
1018	0.13643	99.18	-0.0023432	-0.00011716
1019	0.13691	99.1801	-0.0021143	-0.000105715
1020	0.13719	99.1773	-0.0015429	-7.7145e-05
1021	0.13694	99.1773	-0.001436	-7.18e-05
1022	0.1384	99.1774	-0.0011029	-5.5145e-05
1023	0.1387	99.18	-0.00094972	-4.7486e-05
1024	0.13934	99.18	-0.001086	-5.43e-05
1025	0.13957	99.1826	-0.0013422	-6.711e-05
1026	0.1395	99.1829	-0.0015606	-7.803e-05
1027	0.13964	99.1797	-0.0020589	-0.000102945
1028	0.13993	99.1826	-0.0018407	-9.2035e-05
1029	0.13988	99.1826	-0.0014859	-7.4295e-05
1030	0.14045	99.1826	-0.0011097	-5.5485e-05
1031	0.14116	99.1803	-0.0013813	-6.9065e-05
1032	0.14146	99.18	-0.0014475	-7.2375e-05
1033	0.14202	99.1826	-0.0013399	-6.6995e-05
1034	0.14266	99.1826	-0.0011084	-5.542e-05
1035	0.14264	99.1826	-0.0015844	-7.922e-05
1036	0.14356	99.1826	-0.0016232	-8.116e-05
1037	0.14379	99.1853	-0.0014489	-7.2445e-05
1038	0.14496	99.1849	-0.001572	-7.86e-05
1039	0.14559	99.1853	-0.0018642	-9.321e-05
1040	0.14618	99.1826	-0.0023649	-0.000118245
1041	0.14673	99.1799	-0.0019851	-9.9255e-05
1042	0.14652	99.18	-0.0018224	-9.112e-05
1043	0.14722	99.18	-0.0020846	-0.00010423
1044	0.14867	99.18	-0.0021713	-0.000108565
1045	0.14917	99.18	-0.0020314	-0.00010157
1046	0.14929	99.18	-0.0020219	-0.000101095
1047	0.14865	99.18	-0.0018871	-9.4355e-05
1048	0.14968	99.18	-0.0016542	-8.271e-05
1049	0.14921	99.1799	-0.0014503	-7.2515e-05
1050	0.14906	99.1852	-0.0014475	-7.2375e-05
1051	0.14896	99.1852	-0.0014794	-7.397e-05
1052	0.14838	99.1851	-0.001805	-9.025e-05
1053	0.14888	99.1799	-0.0020475	-0.000102375
1054	0.14998	99.1852	-0.002171	-0.00010855
1055	0.15064	99.1852	-0.001957	-9.785e-05
1056	0.15153	99.1801	-0.0014782	-7.391e-05
1057	0.15282	99.18	-0.0019463	-9.7315e-05
1058	0.15349	99.18	-0.0021711	-0.000108555
1059	0.15419	99.18	-0.0021712	-0.00010856
1060	0.1547	99.18	-0.0021692	-0.00010846
1061	0.15427	99.18	-0.0019759	-9.8795e-05
1062	0.15434	99.18	-0.0018102	-9.051e-05
1063	0.1544	99.18	-0.0018173	-9.0865e-05
1064	0.15491	99.18	-0.0015178	-7.589e-05
1065	0.15549	99.1778	-0.0014475	-7.2375e-05
1066	0.15658	99.1747	-0.0014757	-7.3785e-05
1067	0.1564	99.1747	-0.0019695	-9.8475e-05
1068	0.15732	99.1747	-0.0018437	-9.2185e-05
1069	0.15688	99.1747	-0.0015885	-7.9425e-05
1070	0.15779	99.1747	-0.0014324	-7.162e-05
1071	0.15766	99.1747	-0.0010965	-5.4825e-05
1072	0.15839	99.1692	-0.00075107	-3.75535e-05
1073	0.15787	99.1694	-0.00071982	-3.5991e-05
1074	0.15793	99.1694	-0.00082743	-4.13715e-05
1075	0.1576	99.1748	-0.0010821	-5.4105e-05
1076	0.15724	99.1747	-0.0010856	-5.428e-05
1077	0.1574	99.1746	-0.0010856	-5.428e-05
1078	0.15757	99.172	-0.0010839	-5.4195e-05
1079	0.15683	99.1721	-0.0010234	-5.117e-05
1080	0.15784	99.1694	-0.0013459	-6.7295e-05
1081	0.15762	99.1692	-0.0014829	-7.4145e-05
1082	0.1579	99.1718	-0.0016138	-8.069e-05
1083	0.15813	99.1691	-0.0017804	-8.902e-05
1084	0.15816	99.1684	-0.0014251	-7.1255e-05
1085	0.15834	99.1694	-0.001075	-5.375e-05
1086	0.15905	99.1694	-0.0010856	-5.428e-05
1087	0.16045	99.169	-0.0010856	-5.428e-05
1088	0.15973	99.1694	-0.0010938	-5.469e-05
1089	0.15939	99.1694	-0.0014423	-7.2115e-05
1090	0.16054	99.1694	-0.0014586	-7.293e-05
1091	0.16098	99.172	-0.0014295	-7.1475e-05
1092	0.16147	99.172	-0.0011542	-5.771e-05
1093	0.16189	99.172	-0.0010857	-5.4285e-05
1094	0.16249	99.1719	-0.001304	-6.52e-05
1095	0.16277	99.1747	-0.0019828	-9.914e-05
1096	0.16301	99.1747	-0.0018408	-9.204e-05
1097	0.16383	99.1747	-0.0020388	-0.00010194
1098	0.16361	99.1748	-0.0020209	-0.000101045
1099	0.164	99.1689	-0.0016239	-8.1195e-05
1100	0.16371	99.1723	-0.0017903	-8.9515e-05

## Sheet: FS-N2-30
	Atmosphere: Nitrogen			Material: Foundry sand
	Heating rate: 30 ℃/min
Temp./℃	DSC/(mW/mg)	Mass/%	DTG/(%/min)	DTG/(%/℃)
38	0.0088887	99.9925	-0.0096993	-0.00032331
39	0.012949	99.9812	-0.018886	-0.000629533
40	0.01639	99.9718	-0.01566	-0.000522
41	0.020042	99.9723	-0.012805	-0.000426833
42	0.022848	99.9787	-0.012393	-0.0004131
43	0.026007	99.9824	-0.012425	-0.000414167
44	0.029331	99.99	-0.012567	-0.0004189
45	0.032017	99.99	-0.012921	-0.0004307
46	0.03455	99.9827	-0.013487	-0.000449567
47	0.037143	99.9746	-0.014164	-0.000472133
48	0.039907	99.9697	-0.01457	-0.000485667
49	0.041912	99.968	-0.014364	-0.0004788
50	0.044536	99.9656	-0.014469	-0.0004823
51	0.047416	99.9651	-0.014934	-0.0004978
52	0.049539	99.9646	-0.015077	-0.000502567
53	0.05146	99.9697	-0.015245	-0.000508167
54	0.053456	99.968	-0.015945	-0.0005315
55	0.055812	99.9687	-0.017021	-0.000567367
56	0.05797	99.9707	-0.017256	-0.0005752
57	0.060104	99.9702	-0.017329	-0.000577633
58	0.062434	99.9705	-0.017733	-0.0005911
59	0.064376	99.9723	-0.018154	-0.000605133
60	0.066678	99.9722	-0.018254	-0.000608467
61	0.068475	99.9677	-0.018038	-0.000601267
62	0.070686	99.972	-0.018109	-0.000603633
63	0.072715	99.9705	-0.018232	-0.000607733
64	0.07497	99.9671	-0.018108	-0.0006036
65	0.076408	99.9677	-0.018471	-0.0006157
66	0.078345	99.9654	-0.018799	-0.000626633
67	0.080018	99.9628	-0.019313	-0.000643767
68	0.080958	99.9651	-0.019493	-0.000649767
69	0.082602	99.9646	-0.019443	-0.0006481
70	0.084159	99.9653	-0.019412	-0.000647067
71	0.085605	99.9633	-0.019459	-0.000648633
72	0.087328	99.9612	-0.019668	-0.0006556
73	0.088986	99.9652	-0.019329	-0.0006443
74	0.090665	99.9605	-0.01924	-0.000641333
75	0.091947	99.9597	-0.019484	-0.000649467
76	0.093618	99.9605	-0.019219	-0.000640633
77	0.094654	99.9575	-0.018908	-0.000630267
78	0.095699	99.9582	-0.019353	-0.0006451
79	0.097296	99.9569	-0.020786	-0.000692867
80	0.098212	99.9536	-0.021256	-0.000708533
81	0.099603	99.9525	-0.021269	-0.000708967
82	0.10041	99.9512	-0.021283	-0.000709433
83	0.1016	99.9522	-0.020875	-0.000695833
84	0.10287	99.9503	-0.020399	-0.000679967
85	0.10365	99.9464	-0.020048	-0.000668267
86	0.10483	99.9502	-0.019537	-0.000651233
87	0.10587	99.9503	-0.019232	-0.000641067
88	0.10648	99.9497	-0.019297	-0.000643233
89	0.10853	99.946	-0.01975	-0.000658333
90	0.10948	99.9468	-0.02027	-0.000675667
91	0.11078	99.9478	-0.020416	-0.000680533
92	0.11173	99.9449	-0.021094	-0.000703133
93	0.1121	99.9469	-0.022125	-0.0007375
94	0.11309	99.9428	-0.02277	-0.000759
95	0.11386	99.9458	-0.023447	-0.000781567
96	0.11445	99.9404	-0.024117	-0.0008039
97	0.11511	99.9429	-0.024725	-0.000824167
98	0.11595	99.941	-0.025614	-0.0008538
99	0.11718	99.9403	-0.026149	-0.000871633
100	0.11766	99.9405	-0.026527	-0.000884233
101	0.11897	99.9378	-0.026836	-0.000894533
102	0.11989	99.9354	-0.026798	-0.000893267
103	0.12104	99.9352	-0.026396	-0.000879867
104	0.1222	99.9329	-0.025876	-0.000862533
105	0.12331	99.9334	-0.025489	-0.000849633
106	0.12422	99.9278	-0.025169	-0.000838967
107	0.12489	99.9279	-0.025206	-0.0008402
108	0.12604	99.9278	-0.02481	-0.000827
109	0.12649	99.9224	-0.024847	-0.000828233
110	0.12776	99.9282	-0.025276	-0.000842533
111	0.12852	99.9284	-0.025343	-0.000844767
112	0.12914	99.9229	-0.025823	-0.000860767
113	0.13029	99.9229	-0.026465	-0.000882167
114	0.13171	99.9229	-0.027254	-0.000908467
115	0.13211	99.9233	-0.028438	-0.000947933
116	0.13266	99.9179	-0.029105	-0.000970167
117	0.13364	99.9179	-0.029599	-0.000986633
118	0.13409	99.9152	-0.030007	-0.00100023
119	0.13468	99.9154	-0.030376	-0.00101253
120	0.1356	99.9154	-0.030815	-0.00102717
121	0.13606	99.9132	-0.031428	-0.0010476
122	0.13664	99.9129	-0.032089	-0.00106963
123	0.13747	99.9129	-0.032356	-0.00107853
124	0.13811	99.9129	-0.032556	-0.0010852
125	0.13868	99.9122	-0.033138	-0.0011046
126	0.13897	99.9104	-0.033213	-0.0011071
127	0.1398	99.9104	-0.033282	-0.0011094
128	0.14024	99.9104	-0.033783	-0.0011261
129	0.14051	99.9107	-0.034151	-0.00113837
130	0.14128	99.9079	-0.034585	-0.00115283
131	0.14158	99.9079	-0.034804	-0.00116013
132	0.14228	99.9079	-0.035005	-0.00116683
133	0.14278	99.9081	-0.035122	-0.00117073
134	0.1431	99.9054	-0.035141	-0.00117137
135	0.14372	99.9057	-0.035312	-0.00117707
136	0.14436	99.9029	-0.035428	-0.00118093
137	0.14428	99.9004	-0.035785	-0.00119283
138	0.14477	99.9005	-0.036007	-0.00120023
139	0.14541	99.8977	-0.03598	-0.00119933
140	0.14605	99.898	-0.036608	-0.00122027
141	0.14631	99.898	-0.037155	-0.0012385
142	0.14721	99.898	-0.037272	-0.0012424
143	0.14745	99.8982	-0.037647	-0.0012549
144	0.14828	99.8956	-0.037917	-0.0012639
145	0.14852	99.8955	-0.037932	-0.0012644
146	0.14946	99.8955	-0.038097	-0.0012699
147	0.14989	99.8928	-0.038593	-0.00128643
148	0.15031	99.893	-0.039102	-0.0013034
149	0.15025	99.893	-0.039379	-0.00131263
150	0.15073	99.893	-0.039376	-0.00131253
151	0.15083	99.8929	-0.039261	-0.0013087
152	0.15126	99.8879	-0.039471	-0.0013157
153	0.15106	99.883	-0.039469	-0.00131563
154	0.15128	99.8831	-0.039224	-0.00130747
155	0.1518	99.8831	-0.039165	-0.0013055
156	0.15242	99.8831	-0.039272	-0.00130907
157	0.15184	99.8831	-0.039387	-0.0013129
158	0.15192	99.883	-0.039446	-0.00131487
159	0.15176	99.8777	-0.039548	-0.00131827
160	0.15149	99.8765	-0.03978	-0.001326
161	0.15071	99.8731	-0.040225	-0.00134083
162	0.14984	99.8731	-0.04044	-0.001348
163	0.14915	99.8731	-0.040748	-0.00135827
164	0.14889	99.8731	-0.041043	-0.0013681
165	0.14951	99.8729	-0.041356	-0.00137853
166	0.14942	99.8681	-0.041702	-0.00139007
167	0.15001	99.8681	-0.041722	-0.00139073
168	0.15043	99.868	-0.041407	-0.00138023
169	0.15096	99.8627	-0.041441	-0.00138137
170	0.15114	99.8632	-0.04188	-0.001396
171	0.15151	99.861	-0.041964	-0.0013988
172	0.15162	99.8607	-0.04197	-0.001399
173	0.15173	99.8581	-0.041966	-0.00139887
174	0.15207	99.8583	-0.042375	-0.0014125
175	0.15205	99.8558	-0.043031	-0.00143437
176	0.15038	99.8548	-0.043244	-0.00144147
177	0.15094	99.8532	-0.043417	-0.00144723
178	0.15143	99.8535	-0.043629	-0.0014543
179	0.15103	99.8508	-0.04374	-0.001458
180	0.15111	99.8507	-0.043662	-0.0014554
181	0.15141	99.8482	-0.043666	-0.00145553
182	0.1512	99.8482	-0.043583	-0.00145277
183	0.15105	99.8457	-0.043453	-0.00144843
184	0.1509	99.8457	-0.043267	-0.00144223
185	0.15084	99.8451	-0.043233	-0.0014411
186	0.15094	99.8407	-0.043689	-0.0014563
187	0.15086	99.8408	-0.043733	-0.00145777
188	0.15196	99.8407	-0.043302	-0.0014434
189	0.15215	99.8353	-0.043297	-0.00144323
190	0.15214	99.8358	-0.043998	-0.0014666
191	0.152	99.8357	-0.044108	-0.00147027
192	0.1516	99.8303	-0.043966	-0.00146553
193	0.15151	99.8311	-0.044444	-0.00148147
194	0.1515	99.8289	-0.044962	-0.00149873
195	0.15065	99.8216	-0.045045	-0.0015015
196	0.15062	99.8211	-0.044812	-0.00149373
197	0.15063	99.8183	-0.044853	-0.0014951
198	0.1505	99.8157	-0.045114	-0.0015038
199	0.15046	99.8133	-0.045278	-0.00150927
200	0.15051	99.8111	-0.045423	-0.0015141
201	0.15028	99.8109	-0.045641	-0.00152137
202	0.14979	99.8061	-0.045676	-0.00152253
203	0.14968	99.8059	-0.045824	-0.00152747
204	0.15003	99.8059	-0.046108	-0.00153693
205	0.15045	99.806	-0.046317	-0.0015439
206	0.15045	99.801	-0.046427	-0.00154757
207	0.15057	99.801	-0.046161	-0.0015387
208	0.15131	99.801	-0.046013	-0.00153377
209	0.15087	99.8002	-0.04638	-0.001546
210	0.14981	99.7959	-0.046336	-0.00154453
211	0.14917	99.7933	-0.045997	-0.00153323
212	0.14886	99.7936	-0.045822	-0.0015274
213	0.14795	99.7911	-0.046124	-0.00153747
214	0.14646	99.7903	-0.046605	-0.0015535
215	0.14583	99.7885	-0.046558	-0.00155193
216	0.1456	99.7885	-0.04631	-0.00154367
217	0.14504	99.7858	-0.046152	-0.0015384
218	0.14445	99.786	-0.045935	-0.00153117
219	0.14357	99.7833	-0.04606	-0.00153533
220	0.14325	99.7824	-0.046268	-0.00154227
221	0.14321	99.781	-0.046349	-0.00154497
222	0.14259	99.7784	-0.046308	-0.0015436
223	0.14225	99.7758	-0.046456	-0.00154853
224	0.14164	99.7736	-0.046693	-0.00155643
225	0.1414	99.7736	-0.046742	-0.00155807
226	0.14153	99.7706	-0.046742	-0.00155807
227	0.14162	99.7686	-0.046742	-0.00155807
228	0.14214	99.7685	-0.046748	-0.00155827
229	0.14242	99.7632	-0.046806	-0.0015602
230	0.1418	99.7635	-0.046825	-0.00156083
231	0.14083	99.7583	-0.046815	-0.0015605
232	0.14037	99.7589	-0.047051	-0.00156837
233	0.13987	99.7562	-0.047237	-0.00157457
234	0.13904	99.7562	-0.047307	-0.0015769
235	0.13857	99.7562	-0.04685	-0.00156167
236	0.13825	99.7542	-0.046349	-0.00154497
237	0.13884	99.7537	-0.046692	-0.0015564
238	0.13899	99.7537	-0.047148	-0.0015716
239	0.13821	99.7516	-0.047229	-0.0015743
240	0.13744	99.7512	-0.047245	-0.00157483
241	0.13735	99.7511	-0.047484	-0.0015828
242	0.13715	99.7486	-0.047747	-0.00159157
243	0.13664	99.7466	-0.047269	-0.00157563
244	0.13631	99.7464	-0.046598	-0.00155327
245	0.13558	99.7438	-0.046281	-0.0015427
246	0.13545	99.7416	-0.046255	-0.00154183
247	0.13515	99.7412	-0.046255	-0.00154183
248	0.13479	99.7387	-0.046203	-0.0015401
249	0.13451	99.7344	-0.045937	-0.00153123
250	0.13439	99.7338	-0.046002	-0.0015334
251	0.13328	99.7338	-0.046228	-0.00154093
252	0.13259	99.7338	-0.046114	-0.00153713
253	0.13156	99.7338	-0.045609	-0.0015203
254	0.131	99.7293	-0.045278	-0.00150927
255	0.13064	99.7288	-0.045051	-0.0015017
256	0.1295	99.7288	-0.044803	-0.00149343
257	0.12889	99.7291	-0.044562	-0.0014854
258	0.12777	99.7239	-0.044274	-0.0014758
259	0.12688	99.7216	-0.043977	-0.0014659
260	0.12551	99.7215	-0.043696	-0.00145653
261	0.12512	99.7189	-0.043561	-0.00145203
262	0.1244	99.7167	-0.043911	-0.0014637
263	0.1236	99.7142	-0.04397	-0.00146567
264	0.12335	99.7139	-0.043945	-0.00146483
265	0.12336	99.7141	-0.043991	-0.00146637
266	0.12349	99.7114	-0.043849	-0.00146163
267	0.12336	99.7114	-0.043752	-0.0014584
268	0.12285	99.7092	-0.043741	-0.00145803
269	0.12208	99.7089	-0.043673	-0.00145577
270	0.12205	99.7045	-0.043179	-0.0014393
271	0.12127	99.7039	-0.042881	-0.00142937
272	0.11992	99.7039	-0.042969	-0.0014323
273	0.11888	99.7039	-0.042969	-0.0014323
274	0.11819	99.704	-0.042565	-0.00141883
275	0.11769	99.6997	-0.042576	-0.0014192
276	0.11684	99.6989	-0.042535	-0.00141783
277	0.11666	99.6988	-0.042026	-0.00140087
278	0.11605	99.6938	-0.041665	-0.00138883
279	0.11566	99.6918	-0.041223	-0.0013741
280	0.11508	99.6914	-0.040619	-0.00135397
281	0.11425	99.6889	-0.040219	-0.00134063
282	0.114	99.689	-0.040046	-0.00133487
283	0.11346	99.6843	-0.039838	-0.00132793
284	0.11495	99.684	-0.03947	-0.00131567
285	0.11451	99.6842	-0.039256	-0.00130853
286	0.11461	99.6816	-0.039224	-0.00130747
287	0.11489	99.6793	-0.038793	-0.0012931
288	0.11469	99.679	-0.03849	-0.001283
289	0.11404	99.6765	-0.038451	-0.0012817
290	0.11399	99.6765	-0.038326	-0.00127753
291	0.11345	99.674	-0.038312	-0.00127707
292	0.11285	99.6739	-0.038446	-0.00128153
293	0.11231	99.6765	-0.038411	-0.00128037
294	0.11148	99.6715	-0.038141	-0.00127137
295	0.1109	99.6741	-0.038147	-0.00127157
296	0.11003	99.6741	-0.038253	-0.0012751
297	0.10969	99.6741	-0.038501	-0.00128337
298	0.10859	99.6742	-0.038495	-0.00128317
299	0.10783	99.6691	-0.038229	-0.0012743
300	0.10692	99.6691	-0.03801	-0.001267
301	0.10602	99.6691	-0.037905	-0.0012635
302	0.10575	99.6691	-0.037798	-0.00125993
303	0.1053	99.6691	-0.038094	-0.0012698
304	0.10467	99.664	-0.038074	-0.00126913
305	0.10368	99.6641	-0.037737	-0.0012579
306	0.10317	99.6615	-0.037442	-0.00124807
307	0.10312	99.6616	-0.037186	-0.00123953
308	0.10265	99.6615	-0.037171	-0.00123903
309	0.10195	99.6591	-0.037431	-0.0012477
310	0.10112	99.6591	-0.03767	-0.00125567
311	0.10073	99.6589	-0.037474	-0.00124913
312	0.099622	99.6566	-0.037315	-0.00124383
313	0.099356	99.6566	-0.037375	-0.00124583
314	0.098624	99.6567	-0.037138	-0.00123793
315	0.09812	99.6542	-0.036921	-0.0012307
316	0.097685	99.6541	-0.036678	-0.0012226
317	0.097231	99.6514	-0.036618	-0.0012206
318	0.096944	99.6517	-0.036571	-0.00121903
319	0.096194	99.651	-0.036696	-0.0012232
320	0.095908	99.6491	-0.036914	-0.00123047
321	0.095302	99.6465	-0.03691	-0.00123033
322	0.095046	99.6451	-0.036968	-0.00123227
323	0.09461	99.6417	-0.03705	-0.001235
324	0.094225	99.6417	-0.037285	-0.00124283
325	0.093646	99.6417	-0.037466	-0.00124887
326	0.093015	99.6422	-0.037418	-0.00124727
327	0.09245	99.6369	-0.037456	-0.00124853
328	0.091624	99.6367	-0.037569	-0.0012523
329	0.090954	99.6367	-0.037309	-0.00124363
330	0.089847	99.6367	-0.037001	-0.00123337
331	0.088649	99.6367	-0.036813	-0.0012271
332	0.088062	99.6367	-0.037036	-0.00123453
333	0.086196	99.6368	-0.037172	-0.00123907
334	0.084867	99.6366	-0.036964	-0.00123213
335	0.084896	99.6315	-0.036999	-0.0012333
336	0.084229	99.6318	-0.037296	-0.0012432
337	0.084257	99.6318	-0.037387	-0.00124623
338	0.084162	99.6318	-0.037372	-0.00124573
339	0.083714	99.6318	-0.037184	-0.00123947
340	0.08331	99.6318	-0.037301	-0.00124337
341	0.082545	99.6318	-0.037752	-0.0012584
342	0.081427	99.6318	-0.037555	-0.00125183
343	0.08106	99.6318	-0.037477	-0.00124923
344	0.080213	99.6318	-0.037566	-0.0012522
345	0.079498	99.6318	-0.037566	-0.0012522
346	0.078825	99.6319	-0.03786	-0.001262
347	0.078074	99.6269	-0.037925	-0.00126417
348	0.077524	99.6268	-0.037928	-0.00126427
349	0.076564	99.6263	-0.038226	-0.0012742
350	0.076216	99.6243	-0.038444	-0.00128147
351	0.07519	99.6243	-0.038561	-0.00128537
352	0.074291	99.6245	-0.038819	-0.00129397
353	0.073799	99.6219	-0.039134	-0.00130447
354	0.073298	99.6218	-0.039222	-0.0013074
355	0.072375	99.6218	-0.039082	-0.00130273
356	0.071852	99.6218	-0.03937	-0.00131233
357	0.071753	99.6203	-0.039758	-0.00132527
358	0.071327	99.6193	-0.040498	-0.00134993
359	0.070332	99.6193	-0.040892	-0.00136307
360	0.070072	99.6167	-0.040938	-0.0013646
361	0.069674	99.6168	-0.041165	-0.00137217
362	0.069373	99.6168	-0.041048	-0.00136827
363	0.068227	99.617	-0.040817	-0.00136057
364	0.068182	99.6144	-0.04087	-0.00136233
365	0.067363	99.6144	-0.041063	-0.00136877
366	0.067145	99.6144	-0.041285	-0.00137617
367	0.066942	99.6119	-0.04147	-0.00138233
368	0.066337	99.6119	-0.041451	-0.0013817
369	0.065814	99.6118	-0.04164	-0.001388
370	0.065666	99.6091	-0.041869	-0.00139563
371	0.065891	99.6094	-0.041899	-0.00139663
372	0.065104	99.6094	-0.04218	-0.001406
373	0.064332	99.6094	-0.042368	-0.00141227
374	0.063673	99.6094	-0.042526	-0.00141753
375	0.06264	99.6063	-0.042733	-0.00142443
376	0.062655	99.6044	-0.04317	-0.001439
377	0.06224	99.6044	-0.043943	-0.00146477
378	0.061681	99.6044	-0.044434	-0.00148113
379	0.061779	99.6001	-0.044699	-0.00148997
380	0.061831	99.5994	-0.04525	-0.00150833
381	0.061838	99.5945	-0.045686	-0.00152287
382	0.061433	99.5944	-0.045622	-0.00152073
383	0.060656	99.5944	-0.045714	-0.0015238
384	0.059173	99.5944	-0.046193	-0.00153977
385	0.058821	99.5944	-0.046616	-0.00155387
386	0.058263	99.5944	-0.046917	-0.0015639
387	0.058192	99.5889	-0.047185	-0.00157283
388	0.058633	99.5895	-0.047137	-0.00157123
389	0.058578	99.5895	-0.047151	-0.0015717
390	0.058119	99.5895	-0.047335	-0.00157783
391	0.056963	99.5894	-0.047812	-0.00159373
392	0.055352	99.5873	-0.048005	-0.00160017
393	0.052857	99.5821	-0.048201	-0.0016067
394	0.052404	99.5798	-0.04859	-0.00161967
395	0.051303	99.5795	-0.048602	-0.00162007
396	0.051283	99.577	-0.048937	-0.00163123
397	0.050981	99.5771	-0.049431	-0.0016477
398	0.050325	99.5746	-0.04974	-0.001658
399	0.050145	99.5747	-0.049871	-0.00166237
400	0.049773	99.5721	-0.050035	-0.00166783
401	0.049582	99.5693	-0.050079	-0.0016693
402	0.0492	99.5696	-0.050312	-0.00167707
403	0.048616	99.5683	-0.050685	-0.0016895
404	0.048205	99.5671	-0.050936	-0.00169787
405	0.048112	99.5653	-0.050866	-0.00169553
406	0.047594	99.5646	-0.050801	-0.00169337
407	0.047222	99.5645	-0.050798	-0.00169327
408	0.0471	99.5596	-0.051369	-0.0017123
409	0.046553	99.5596	-0.051895	-0.00172983
410	0.046103	99.5596	-0.051873	-0.0017291
411	0.045565	99.5542	-0.051938	-0.00173127
412	0.045146	99.5546	-0.052348	-0.00174493
413	0.044799	99.5546	-0.052668	-0.0017556
414	0.044203	99.5546	-0.052968	-0.0017656
415	0.043668	99.5552	-0.053304	-0.0017768
416	0.043181	99.5497	-0.053846	-0.00179487
417	0.042568	99.5471	-0.054003	-0.0018001
418	0.041994	99.545	-0.053866	-0.00179553
419	0.041409	99.5447	-0.053952	-0.0017984
420	0.040685	99.5422	-0.054112	-0.00180373
421	0.040098	99.542	-0.054603	-0.0018201
422	0.039458	99.5416	-0.055255	-0.00184183
423	0.038418	99.5396	-0.055675	-0.00185583
424	0.037794	99.5342	-0.056053	-0.00186843
425	0.037357	99.5347	-0.056432	-0.00188107
426	0.036602	99.5353	-0.056792	-0.00189307
427	0.036084	99.5298	-0.057098	-0.00190327
428	0.035426	99.5297	-0.05752	-0.00191733
429	0.035037	99.5248	-0.057856	-0.00192853
430	0.034419	99.5221	-0.057686	-0.00192287
431	0.033797	99.5217	-0.057803	-0.00192677
432	0.033331	99.5189	-0.058127	-0.00193757
433	0.03296	99.5161	-0.057992	-0.00193307
434	0.032161	99.5147	-0.057937	-0.00193123
435	0.031971	99.5122	-0.057938	-0.00193127
436	0.031519	99.5079	-0.058188	-0.0019396
437	0.030816	99.5074	-0.058409	-0.00194697
438	0.030356	99.507	-0.058433	-0.00194777
439	0.030059	99.5024	-0.058572	-0.0019524
440	0.029837	99.5015	-0.058882	-0.00196273
441	0.029325	99.4944	-0.059029	-0.00196763
442	0.029084	99.4934	-0.059183	-0.00197277
443	0.028504	99.4897	-0.059138	-0.00197127
444	0.028251	99.4874	-0.059385	-0.0019795
445	0.027748	99.4875	-0.05971	-0.00199033
446	0.027138	99.485	-0.059799	-0.0019933
447	0.026794	99.4827	-0.060026	-0.00200087
448	0.026086	99.4802	-0.060501	-0.0020167
449	0.025909	99.4775	-0.060936	-0.0020312
450	0.025504	99.4721	-0.061142	-0.00203807
451	0.025099	99.4726	-0.06164	-0.00205467
452	0.024706	99.4679	-0.061746	-0.0020582
453	0.023884	99.4676	-0.06193	-0.00206433
454	0.023939	99.4669	-0.062437	-0.00208123
455	0.023429	99.4627	-0.062793	-0.0020931
456	0.023289	99.4601	-0.063087	-0.0021029
457	0.022706	99.4573	-0.063097	-0.00210323
458	0.022326	99.4549	-0.062833	-0.00209443
459	0.021737	99.4526	-0.062947	-0.00209823
460	0.021773	99.4451	-0.063278	-0.00210927
461	0.020972	99.4452	-0.063315	-0.0021105
462	0.020795	99.4455	-0.062995	-0.00209983
463	0.020567	99.4403	-0.062849	-0.00209497
464	0.020232	99.4402	-0.062757	-0.0020919
465	0.019893	99.4363	-0.063238	-0.00210793
466	0.019569	99.4329	-0.063731	-0.00212437
467	0.019211	99.4301	-0.064098	-0.0021366
468	0.018928	99.4304	-0.064551	-0.0021517
469	0.01877	99.4278	-0.064409	-0.00214697
470	0.018361	99.4249	-0.064688	-0.00215627
471	0.018145	99.4226	-0.065198	-0.00217327
472	0.018079	99.4206	-0.065569	-0.00218563
473	0.017793	99.4154	-0.065774	-0.00219247
474	0.017552	99.4153	-0.065461	-0.00218203
475	0.016938	99.414	-0.064665	-0.0021555
476	0.016875	99.4103	-0.064056	-0.0021352
477	0.016571	99.4102	-0.063951	-0.0021317
478	0.016512	99.4052	-0.063932	-0.00213107
479	0.015793	99.4029	-0.063886	-0.00212953
480	0.015854	99.4002	-0.063814	-0.00212713
481	0.015764	99.3997	-0.063611	-0.00212037
482	0.015148	99.3978	-0.06346	-0.00211533
483	0.015154	99.3952	-0.06368	-0.00212267
484	0.01491	99.3934	-0.063714	-0.0021238
485	0.014596	99.3881	-0.063454	-0.00211513
486	0.014846	99.388	-0.063393	-0.0021131
487	0.014185	99.3865	-0.063657	-0.0021219
488	0.014175	99.3829	-0.063741	-0.0021247
489	0.013978	99.3835	-0.063374	-0.00211247
490	0.01356	99.3782	-0.063163	-0.00210543
491	0.013098	99.3755	-0.06364	-0.00212133
492	0.013145	99.3732	-0.063706	-0.00212353
493	0.012982	99.3708	-0.063438	-0.0021146
494	0.012639	99.3681	-0.063592	-0.00211973
495	0.012633	99.3662	-0.063768	-0.0021256
496	0.012362	99.3656	-0.063711	-0.0021237
497	0.012111	99.3603	-0.063406	-0.00211353
498	0.011709	99.3606	-0.063063	-0.0021021
499	0.011775	99.3604	-0.062919	-0.0020973
500	0.011233	99.3552	-0.062724	-0.0020908
501	0.010969	99.3556	-0.062592	-0.0020864
502	0.010547	99.3555	-0.062817	-0.0020939
503	0.010649	99.3502	-0.062749	-0.00209163
504	0.010326	99.3483	-0.062653	-0.00208843
505	0.0099059	99.3456	-0.062267	-0.00207557
506	0.0096902	99.343	-0.062165	-0.00207217
507	0.0092672	99.3407	-0.062092	-0.00206973
508	0.0090684	99.3407	-0.061837	-0.00206123
509	0.0087972	99.3384	-0.061831	-0.00206103
510	0.0084509	99.336	-0.061783	-0.00205943
511	0.0080506	99.3332	-0.061503	-0.0020501
512	0.0076808	99.3334	-0.0611	-0.00203667
513	0.0077229	99.3282	-0.060772	-0.00202573
514	0.0071873	99.3282	-0.060843	-0.0020281
515	0.006897	99.3282	-0.060759	-0.0020253
516	0.006973	99.3281	-0.060352	-0.00201173
517	0.0065057	99.3231	-0.059728	-0.00199093
518	0.0062349	99.3233	-0.059349	-0.0019783
519	0.0062067	99.3232	-0.05889	-0.001963
520	0.005787	99.3237	-0.058796	-0.00195987
521	0.0056532	99.3184	-0.058752	-0.0019584
522	0.0056605	99.3184	-0.058042	-0.00193473
523	0.0054594	99.3158	-0.05743	-0.00191433
524	0.0052273	99.3151	-0.056857	-0.00189523
525	0.005467	99.3135	-0.056481	-0.0018827
526	0.0049427	99.3109	-0.056149	-0.00187163
527	0.004971	99.3085	-0.055759	-0.00185863
528	0.0048644	99.3057	-0.055568	-0.00185227
529	0.0046583	99.3043	-0.055591	-0.00185303
530	0.0046444	99.3009	-0.055231	-0.00184103
531	0.0035598	99.297	-0.055227	-0.0018409
532	0.0031438	99.2959	-0.055191	-0.0018397
533	0.0034193	99.296	-0.054754	-0.00182513
534	0.0032854	99.291	-0.054693	-0.0018231
535	0.0029573	99.2882	-0.054219	-0.0018073
536	0.0031108	99.2886	-0.054	-0.0018
537	0.0030427	99.2859	-0.054082	-0.00180273
538	0.0026701	99.2854	-0.053757	-0.0017919
539	0.0023025	99.2834	-0.053239	-0.00177463
540	0.0028573	99.2808	-0.052459	-0.00174863
541	0.0027719	99.2787	-0.05186	-0.00172867
542	0.0024387	99.2785	-0.051857	-0.00172857
543	0.0020998	99.2757	-0.051382	-0.00171273
544	0.0023662	99.2746	-0.051209	-0.00170697
545	0.0025214	99.274	-0.051077	-0.00170257
546	0.0022219	99.2685	-0.050681	-0.00168937
547	0.0023403	99.2687	-0.050542	-0.00168473
548	0.0022708	99.2637	-0.050505	-0.0016835
549	0.0022683	99.2634	-0.050443	-0.00168143
550	0.0023754	99.2583	-0.050697	-0.0016899
551	0.0023759	99.2561	-0.050681	-0.00168937
552	0.0021993	99.2533	-0.05029	-0.00167633
553	0.0026527	99.2538	-0.04959	-0.001653
554	0.0030195	99.2511	-0.049158	-0.0016386
555	0.0031463	99.251	-0.0487	-0.00162333
556	0.0034728	99.2536	-0.048252	-0.0016084
557	0.0038085	99.2527	-0.047993	-0.00159977
558	0.00394	99.2511	-0.047378	-0.00157927
559	0.0043345	99.2489	-0.046843	-0.00156143
560	0.0045399	99.2486	-0.046398	-0.0015466
561	0.0052957	99.2486	-0.046343	-0.00154477
562	0.0059172	99.2491	-0.046544	-0.00155147
563	0.0066446	99.2437	-0.046281	-0.0015427
564	0.0074246	99.2436	-0.045766	-0.00152553
565	0.0084314	99.2436	-0.045096	-0.0015032
566	0.010029	99.2441	-0.04509	-0.001503
567	0.011064	99.2387	-0.045065	-0.00150217
568	0.013585	99.2387	-0.044757	-0.0014919
569	0.016328	99.2387	-0.04424	-0.00147467
570	0.02181	99.2368	-0.043566	-0.0014522
571	0.033628	99.2336	-0.043119	-0.0014373
572	0.055957	99.2311	-0.042623	-0.00142077
573	0.070198	99.2313	-0.042132	-0.0014044
574	0.067805	99.2288	-0.041794	-0.00139313
575	0.059028	99.2287	-0.04148	-0.00138267
576	0.049366	99.2289	-0.04111	-0.00137033
577	0.039674	99.2262	-0.040559	-0.00135197
578	0.03123	99.2264	-0.040383	-0.0013461
579	0.024004	99.2238	-0.040008	-0.0013336
580	0.018011	99.2237	-0.03965	-0.00132167
581	0.012525	99.2212	-0.039951	-0.0013317
582	0.0074336	99.2212	-0.039589	-0.00131963
583	0.0027114	99.2199	-0.039133	-0.00130443
584	-0.0011906	99.2187	-0.039006	-0.0013002
585	-0.0046429	99.2188	-0.038561	-0.00128537
586	-0.0078858	99.2163	-0.037782	-0.0012594
587	-0.010686	99.2151	-0.03745	-0.00124833
588	-0.013384	99.2138	-0.037126	-0.00123753
589	-0.015971	99.209	-0.036758	-0.00122527
590	-0.01817	99.2088	-0.036589	-0.00121963
591	-0.020024	99.2088	-0.036359	-0.00121197
592	-0.021697	99.2088	-0.036051	-0.0012017
593	-0.023918	99.2042	-0.036097	-0.00120323
594	-0.025301	99.2038	-0.036376	-0.00121253
595	-0.026604	99.2038	-0.036419	-0.00121397
596	-0.02784	99.2038	-0.035941	-0.00119803
597	-0.029415	99.2038	-0.035796	-0.0011932
598	-0.030561	99.2038	-0.035995	-0.00119983
599	-0.031908	99.2041	-0.035835	-0.0011945
600	-0.032904	99.199	-0.035271	-0.0011757
601	-0.033579	99.1988	-0.034932	-0.0011644
602	-0.034557	99.1988	-0.034717	-0.00115723
603	-0.035309	99.1988	-0.03475	-0.00115833
604	-0.036009	99.1988	-0.034508	-0.00115027
605	-0.036605	99.1988	-0.034157	-0.00113857
606	-0.037363	99.1988	-0.033816	-0.0011272
607	-0.03775	99.199	-0.033376	-0.00111253
608	-0.038263	99.194	-0.033036	-0.0011012
609	-0.038807	99.1939	-0.032654	-0.00108847
610	-0.039383	99.1894	-0.032159	-0.00107197
611	-0.039564	99.1889	-0.031696	-0.00105653
612	-0.03985	99.1888	-0.031272	-0.0010424
613	-0.040205	99.1862	-0.030476	-0.00101587
614	-0.040712	99.1864	-0.030281	-0.00100937
615	-0.040975	99.1863	-0.030028	-0.00100093
616	-0.040833	99.1812	-0.029568	-0.0009856
617	-0.041434	99.1814	-0.029063	-0.000968767
618	-0.041909	99.1814	-0.0287	-0.000956667
619	-0.042198	99.1814	-0.028355	-0.000945167
620	-0.042501	99.1816	-0.027976	-0.000932533
621	-0.042513	99.179	-0.027718	-0.000923933
622	-0.042895	99.1789	-0.027411	-0.0009137
623	-0.043081	99.179	-0.02701	-0.000900333
624	-0.043205	99.1765	-0.026454	-0.0008818
625	-0.043301	99.1752	-0.025938	-0.0008646
626	-0.043286	99.1742	-0.025982	-0.000866067
627	-0.043126	99.1715	-0.025814	-0.000860467
628	-0.043277	99.1718	-0.025259	-0.000841967
629	-0.043232	99.1669	-0.02446	-0.000815333
630	-0.043127	99.1641	-0.023894	-0.000796467
631	-0.043344	99.164	-0.023514	-0.0007838
632	-0.043232	99.164	-0.023203	-0.000773433
633	-0.043241	99.164	-0.022955	-0.000765167
634	-0.043052	99.164	-0.023159	-0.000771967
635	-0.043113	99.164	-0.023799	-0.0007933
636	-0.043352	99.164	-0.024026	-0.000800867
637	-0.043379	99.164	-0.023822	-0.000794067
638	-0.04336	99.164	-0.023542	-0.000784733
639	-0.043444	99.164	-0.023381	-0.000779367
640	-0.043355	99.1627	-0.023298	-0.0007766
641	-0.043418	99.159	-0.022683	-0.0007561
642	-0.044032	99.159	-0.022275	-0.0007425
643	-0.044004	99.159	-0.022736	-0.000757867
644	-0.044045	99.1591	-0.022851	-0.0007617
645	-0.043881	99.1559	-0.022471	-0.000749033
646	-0.044054	99.154	-0.022056	-0.0007352
647	-0.044394	99.1541	-0.022257	-0.0007419
648	-0.044214	99.1541	-0.022296	-0.0007432
649	-0.043807	99.1541	-0.021777	-0.0007259
650	-0.043975	99.1541	-0.021298	-0.000709933
651	-0.044003	99.1541	-0.020992	-0.000699733
652	-0.043733	99.1541	-0.020853	-0.0006951
653	-0.043896	99.1541	-0.020884	-0.000696133
654	-0.043784	99.1541	-0.020901	-0.0006967
655	-0.043641	99.1541	-0.020665	-0.000688833
656	-0.043712	99.1541	-0.020447	-0.000681567
657	-0.043869	99.1541	-0.02029	-0.000676333
658	-0.043581	99.1541	-0.020334	-0.0006778
659	-0.043315	99.1545	-0.020344	-0.000678133
660	-0.04321	99.1492	-0.020187	-0.0006729
661	-0.043443	99.1491	-0.020295	-0.0006765
662	-0.04331	99.1486	-0.020094	-0.0006698
663	-0.043474	99.1466	-0.019915	-0.000663833
664	-0.043293	99.1462	-0.019653	-0.0006551
665	-0.04336	99.149	-0.019561	-0.000652033
666	-0.043222	99.1491	-0.019623	-0.0006541
667	-0.043142	99.1491	-0.01984	-0.000661333
668	-0.043507	99.1468	-0.019622	-0.000654067
669	-0.043228	99.1466	-0.019479	-0.0006493
670	-0.043093	99.1468	-0.019466	-0.000648867
671	-0.04314	99.1441	-0.019212	-0.0006404
672	-0.042985	99.144	-0.018658	-0.000621933
673	-0.04274	99.1416	-0.018604	-0.000620133
674	-0.042896	99.1416	-0.018885	-0.0006295
675	-0.042686	99.1416	-0.018996	-0.0006332
676	-0.042647	99.1392	-0.019158	-0.0006386
677	-0.042731	99.1391	-0.01932	-0.000644
678	-0.042436	99.1391	-0.018844	-0.000628133
679	-0.04241	99.1391	-0.018521	-0.000617367
680	-0.042277	99.1392	-0.018502	-0.000616733
681	-0.04255	99.1374	-0.018502	-0.000616733
682	-0.042591	99.1366	-0.018502	-0.000616733
683	-0.042737	99.1366	-0.018502	-0.000616733
684	-0.042662	99.1366	-0.018506	-0.000616867
685	-0.042641	99.1366	-0.018502	-0.000616733
686	-0.042554	99.1364	-0.018226	-0.000607533
687	-0.042252	99.1341	-0.017991	-0.0005997
688	-0.042624	99.1342	-0.017581	-0.000586033
689	-0.042066	99.1342	-0.017105	-0.000570167
690	-0.042236	99.1342	-0.016997	-0.000566567
691	-0.04191	99.1401	-0.016739	-0.000557967
692	-0.041561	99.1342	-0.016587	-0.0005529
693	-0.041729	99.1342	-0.016607	-0.000553567
694	-0.041517	99.1339	-0.016294	-0.000543133
695	-0.04178	99.1366	-0.016081	-0.000536033
696	-0.041255	99.1366	-0.016068	-0.0005356
697	-0.04117	99.1366	-0.016063	-0.000535433
698	-0.041464	99.1366	-0.015937	-0.000531233
699	-0.041361	99.1366	-0.015679	-0.000522633
700	-0.041805	99.1366	-0.015943	-0.000531433
701	-0.04169	99.1366	-0.01634	-0.000544667
702	-0.041786	99.1366	-0.016118	-0.000537267
703	-0.041644	99.1367	-0.015787	-0.000526233
704	-0.041576	99.1338	-0.015397	-0.000513233
705	-0.041817	99.1317	-0.015114	-0.0005038
706	-0.041686	99.1341	-0.014747	-0.000491567
707	-0.041599	99.1342	-0.014032	-0.000467733
708	-0.041457	99.1342	-0.013666	-0.000455533
709	-0.0415	99.1342	-0.013474	-0.000449133
710	-0.041566	99.1342	-0.013204	-0.000440133
711	-0.040985	99.1342	-0.013147	-0.000438233
712	-0.040986	99.1342	-0.013146	-0.0004382
713	-0.040242	99.1287	-0.013146	-0.0004382
714	-0.040699	99.1292	-0.013189	-0.000439633
715	-0.040301	99.1292	-0.013615	-0.000453833
716	-0.040469	99.1292	-0.014067	-0.0004689
717	-0.040598	99.1292	-0.014015	-0.000467167
718	-0.040093	99.1292	-0.013483	-0.000449433
719	-0.040112	99.1316	-0.013164	-0.0004388
720	-0.040192	99.1296	-0.013146	-0.0004382
721	-0.040316	99.1267	-0.013144	-0.000438133
722	-0.039964	99.1267	-0.012986	-0.000432867
723	-0.040155	99.1267	-0.012421	-0.000414033
724	-0.040033	99.127	-0.01218	-0.000406
725	-0.040132	99.1242	-0.012172	-0.000405733
726	-0.040552	99.1242	-0.012158	-0.000405267
727	-0.040162	99.1242	-0.011968	-0.000398933
728	-0.040673	99.1242	-0.011721	-0.0003907
729	-0.04012	99.1242	-0.011595	-0.0003865
730	-0.040079	99.123	-0.011311	-0.000377033
731	-0.040295	99.1217	-0.011202	-0.0003734
732	-0.039921	99.1217	-0.011199	-0.0003733
733	-0.039648	99.1217	-0.011199	-0.0003733
734	-0.03993	99.1217	-0.011199	-0.0003733
735	-0.039725	99.1216	-0.011221	-0.000374033
736	-0.039399	99.1192	-0.011476	-0.000382533
737	-0.039841	99.1192	-0.011469	-0.0003823
738	-0.039427	99.1167	-0.011219	-0.000373967
739	-0.039666	99.1167	-0.011199	-0.0003733
740	-0.039422	99.1167	-0.011201	-0.000373367
741	-0.039412	99.1167	-0.01134	-0.000378
742	-0.039447	99.1167	-0.011751	-0.0003917
743	-0.039656	99.114	-0.011929	-0.000397633
744	-0.03929	99.1145	-0.012128	-0.000404267
745	-0.038931	99.1092	-0.012002	-0.000400067
746	-0.039424	99.1093	-0.011736	-0.0003912
747	-0.03885	99.1093	-0.011617	-0.000387233
748	-0.038601	99.1093	-0.011335	-0.000377833
749	-0.038173	99.1093	-0.011094	-0.0003698
750	-0.038006	99.1093	-0.010804	-0.000360133
751	-0.038561	99.1067	-0.010713	-0.0003571
752	-0.038373	99.1068	-0.010663	-0.000355433
753	-0.037706	99.1067	-0.0104	-0.000346667
754	-0.037661	99.1043	-0.010234	-0.000341133
755	-0.037737	99.1043	-0.010225	-0.000340833
756	-0.037608	99.1043	-0.010248	-0.0003416
757	-0.037099	99.1043	-0.010459	-0.000348633
758	-0.036604	99.1043	-0.010508	-0.000350267
759	-0.036503	99.1043	-0.01027	-0.000342333
760	-0.036558	99.1043	-0.010225	-0.000340833
761	-0.036039	99.1043	-0.010221	-0.0003407
762	-0.035291	99.1042	-0.010096	-0.000336533
763	-0.035439	99.1018	-0.0096712	-0.000322373
764	-0.034991	99.1018	-0.0093153	-0.00031051
765	-0.035167	99.1018	-0.0092516	-0.000308387
766	-0.034626	99.1018	-0.0092513	-0.000308377
767	-0.034357	99.1018	-0.009328	-0.000310933
768	-0.034296	99.1018	-0.0096105	-0.00032035
769	-0.033645	99.1018	-0.0093947	-0.000313157
770	-0.033254	99.1012	-0.0092988	-0.00030996
771	-0.033547	99.0993	-0.0096681	-0.00032227
772	-0.032806	99.0993	-0.010129	-0.000337633
773	-0.032698	99.0993	-0.01022	-0.000340667
774	-0.032273	99.0993	-0.010107	-0.0003369
775	-0.032307	99.0993	-0.0098225	-0.000327417
776	-0.031923	99.0993	-0.0097393	-0.000324643
777	-0.032117	99.0999	-0.009738	-0.0003246
778	-0.03221	99.0944	-0.009738	-0.0003246
779	-0.031575	99.0944	-0.009738	-0.0003246
780	-0.031793	99.0944	-0.0096966	-0.00032322
781	-0.031552	99.0944	-0.0092736	-0.00030912
782	-0.031159	99.0944	-0.0089086	-0.000296953
783	-0.031457	99.0944	-0.0091423	-0.000304743
784	-0.031187	99.0944	-0.0092485	-0.000308283
785	-0.031402	99.0944	-0.0092511	-0.00030837
786	-0.031121	99.0941	-0.0092511	-0.00030837
787	-0.031073	99.0968	-0.0092597	-0.000308657
788	-0.031401	99.0968	-0.0094067	-0.000313557
789	-0.030632	99.0968	-0.009378	-0.0003126
790	-0.03027	99.0968	-0.0086366	-0.000287887
791	-0.030108	99.0969	-0.0082925	-0.000276417
792	-0.030008	99.094	-0.0082773	-0.00027591
793	-0.029567	99.0918	-0.0082773	-0.00027591
794	-0.029427	99.0919	-0.008284	-0.000276133
795	-0.029031	99.0919	-0.008516	-0.000283867
796	-0.028755	99.0919	-0.0090252	-0.00030084
797	-0.028102	99.0919	-0.0087077	-0.000290257
798	-0.028184	99.0919	-0.0083163	-0.00027721
799	-0.02708	99.0919	-0.0084267	-0.00028089
800	-0.027033	99.0919	-0.008688	-0.0002896
801	-0.026727	99.0919	-0.0085507	-0.000285023
802	-0.026842	99.0919	-0.0083088	-0.00027696
803	-0.026979	99.0918	-0.0082773	-0.00027591
804	-0.026372	99.0938	-0.0082773	-0.00027591
805	-0.026117	99.0944	-0.0082771	-0.000275903
806	-0.026448	99.0941	-0.0082279	-0.000274263
807	-0.025914	99.0968	-0.0079607	-0.000265357
808	-0.025747	99.0968	-0.0077994	-0.00025998
809	-0.025972	99.0968	-0.0078936	-0.00026312
810	-0.025986	99.0968	-0.0084323	-0.000281077
811	-0.025845	99.0968	-0.008709	-0.0002903
812	-0.025015	99.0969	-0.00847	-0.000282333
813	-0.025396	99.0923	-0.0082874	-0.000276247
814	-0.024518	99.0919	-0.0081826	-0.000272753
815	-0.024483	99.0918	-0.0078949	-0.000263163
816	-0.024401	99.0919	-0.0077927	-0.000259757
817	-0.023744	99.0893	-0.0077896	-0.000259653
818	-0.024299	99.0894	-0.0076646	-0.000255487
819	-0.023895	99.0894	-0.0069674	-0.000232247
820	-0.023266	99.0866	-0.0063094	-0.000210313
821	-0.023243	99.0869	-0.0057122	-0.000190407
822	-0.023084	99.0869	-0.005375	-0.000179167
823	-0.022732	99.0869	-0.0053559	-0.00017853
824	-0.022506	99.0869	-0.0053559	-0.00017853
825	-0.022248	99.0869	-0.0053559	-0.00017853
826	-0.022132	99.0869	-0.0053512	-0.000178373
827	-0.021641	99.0869	-0.0052196	-0.000173987
828	-0.021685	99.0869	-0.0049384	-0.000164613
829	-0.02127	99.0869	-0.0048505	-0.000161683
830	-0.02121	99.0869	-0.0046406	-0.000154687
831	-0.020383	99.0869	-0.0044091	-0.00014697
832	-0.020862	99.0869	-0.0043821	-0.00014607
833	-0.020613	99.0868	-0.0043821	-0.00014607
834	-0.020551	99.0845	-0.0043821	-0.00014607
835	-0.02026	99.0844	-0.0043821	-0.00014607
836	-0.020054	99.0844	-0.0043993	-0.000146643
837	-0.019696	99.0844	-0.0047211	-0.00015737
838	-0.019704	99.0844	-0.0052354	-0.000174513
839	-0.02014	99.0867	-0.0050656	-0.000168853
840	-0.019769	99.0869	-0.0043669	-0.000145563
841	-0.019847	99.0869	-0.0039311	-0.000131037
842	-0.019643	99.0869	-0.0038952	-0.00012984
843	-0.019106	99.0869	-0.0038952	-0.00012984
844	-0.019509	99.0869	-0.0038952	-0.00012984
845	-0.019106	99.0869	-0.0038936	-0.000129787
846	-0.018867	99.0869	-0.0038038	-0.000126793
847	-0.018645	99.0871	-0.0035176	-0.000117253
848	-0.018447	99.0844	-0.0034109	-0.000113697
849	-0.017985	99.0844	-0.0034083	-0.00011361
850	-0.017791	99.0844	-0.0034083	-0.00011361
851	-0.017424	99.0867	-0.0034083	-0.00011361
852	-0.017162	99.0869	-0.0034077	-0.00011359
853	-0.016334	99.0869	-0.0032956	-0.000109853
854	-0.015869	99.0869	-0.0027502	-9.16733e-05
855	-0.015331	99.0869	-0.0024486	-8.162e-05
856	-0.014547	99.0869	-0.0024345	-8.115e-05
857	-0.014257	99.0869	-0.0024345	-8.115e-05
858	-0.014403	99.0869	-0.0024345	-8.115e-05
859	-0.013507	99.0869	-0.0024345	-8.115e-05
860	-0.012711	99.0869	-0.0024345	-8.115e-05
861	-0.012712	99.0869	-0.002435	-8.11667e-05
862	-0.012668	99.0869	-0.0024969	-8.323e-05
863	-0.012247	99.0869	-0.0027746	-9.24867e-05
864	-0.012301	99.0868	-0.0029156	-9.71867e-05
865	-0.011591	99.0843	-0.0029188	-9.72933e-05
866	-0.011239	99.0868	-0.00275	-9.16667e-05
867	-0.011102	99.0869	-0.0021679	-7.22633e-05
868	-0.011196	99.0869	-0.0016817	-5.60567e-05
869	-0.01043	99.0869	-0.0011129	-3.70967e-05
870	-0.010202	99.0869	-0.00097378	-3.24593e-05
871	-0.0097587	99.0869	-0.00083288	-2.77627e-05
872	-0.0098359	99.0842	-0.00026904	-8.968e-06
873	-0.010062	99.0844	-9.1304e-06	-3.04347e-07
874	-0.0091971	99.0844	6.7199e-09	2.23997e-10
875	-0.009016	99.0844	1.4047e-05	4.68233e-07
876	-0.0085796	99.0817	0.00020478	6.826e-06
877	-0.0083948	99.0819	0.00045212	1.50707e-05
878	-0.008475	99.0819	0.00047213	1.57377e-05
879	-0.0083558	99.0819	0.00027154	9.05133e-06
880	-0.00843	99.0819	-0.00011764	-3.92133e-06
881	-0.0080594	99.0819	-0.00042695	-1.42317e-05
882	-0.0082359	99.0819	-0.0005474	-1.82467e-05
883	-0.007341	99.0819	-0.00082461	-2.7487e-05
884	-0.0070505	99.0819	-0.0009688	-3.22933e-05
885	-0.0065195	99.0819	-0.0011006	-3.66867e-05
886	-0.0058169	99.0816	-0.0016461	-5.487e-05
887	-0.0053919	99.0769	-0.0017457	-5.819e-05
888	-0.0047541	99.0769	-0.001485	-4.95e-05
889	-0.0041982	99.0769	-0.0011315	-3.77167e-05
890	-0.0035515	99.0769	-0.00059077	-1.96923e-05
891	-0.0031306	99.0769	-0.00048576	-1.6192e-05
892	-0.0025572	99.0769	-0.00039546	-1.3182e-05
893	-0.0022905	99.0769	-0.00010859	-3.61967e-06
894	-0.0020462	99.0769	-2.5727e-06	-8.57567e-08
895	-0.00205	99.078	1.4031e-05	4.677e-07
896	-0.0018415	99.0819	0.00020513	6.83767e-06
897	-0.0015941	99.0819	0.00045269	1.50897e-05
898	-0.0013663	99.0819	0.00048689	1.62297e-05
899	-0.00049609	99.0819	0.0004869	1.623e-05
900	-0.00029886	99.0819	0.00042033	1.4011e-05
901	0.00017957	99.0819	-7.1252e-05	-2.37507e-06
902	0.00066134	99.0819	-0.0004578	-1.526e-05
903	0.00093442	99.0819	-0.00048934	-1.63113e-05
904	0.0015725	99.0819	-0.000594	-1.98e-05
905	0.0018168	99.0819	-0.00088166	-2.93887e-05
906	0.0022057	99.0819	-0.00097221	-3.2407e-05
907	0.0019982	99.0819	-0.0009738	-3.246e-05
908	0.0025882	99.0819	-0.00097369	-3.24563e-05
909	0.0028561	99.0819	-0.00089261	-2.97537e-05
910	0.0031713	99.0819	-0.00037716	-1.2572e-05
911	0.0031775	99.0819	-2.249e-05	-7.49667e-07
912	0.0033722	99.0819	-7.4658e-09	-2.4886e-10
913	0.0032181	99.0818	6.1904e-06	2.06347e-07
914	0.0034514	99.0769	0.00014168	4.72267e-06
915	0.0035916	99.0769	0.00019855	6.61833e-06
916	0.0040339	99.0764	-0.000268	-8.93333e-06
917	0.0038697	99.0819	-0.00048883	-1.62943e-05
918	0.0038587	99.0819	-0.00067686	-2.2562e-05
919	0.0042757	99.0819	-0.00093362	-3.11207e-05
920	0.0045768	99.0819	-0.00097376	-3.24587e-05
921	0.0043639	99.0819	-0.00097381	-3.24603e-05
922	0.0045518	99.0819	-0.00097228	-3.24093e-05
923	0.0043085	99.0819	-0.00088239	-2.9413e-05
924	0.005088	99.0819	-0.00059445	-1.9815e-05
925	0.0048881	99.0819	-0.00048938	-1.63127e-05
926	0.0048246	99.0819	-0.00050134	-1.67113e-05
927	0.0054225	99.0819	-0.00069463	-2.31543e-05
928	0.0053484	99.0819	-0.0009407	-3.13567e-05
929	0.0051145	99.0819	-0.00092833	-3.09443e-05
930	0.0054604	99.0819	-0.00066536	-2.21787e-05
931	0.0055992	99.0819	-0.00049662	-1.6554e-05
932	0.0058578	99.0819	-0.00048688	-1.62293e-05
933	0.0057178	99.0819	-0.00051178	-1.70593e-05
934	0.0053534	99.0819	-0.0007398	-2.466e-05
935	0.0060426	99.0819	-0.0010034	-3.34467e-05
936	0.0062859	99.0819	-0.0012911	-4.30367e-05
937	0.0063351	99.0819	-0.0014646	-4.882e-05
938	0.0067245	99.0819	-0.0016567	-5.52233e-05
939	0.0064677	99.0819	-0.0019115	-6.37167e-05
940	0.0066531	99.0819	-0.0019995	-6.665e-05
941	0.0068544	99.0819	-0.0020305	-6.76833e-05
942	0.0070545	99.0819	-0.0020165	-6.72167e-05
943	0.0072469	99.0874	-0.0024859	-8.28633e-05
944	0.0070315	99.0869	-0.0028883	-9.62767e-05
945	0.007894	99.0869	-0.0029214	-9.738e-05
946	0.0080784	99.0869	-0.0029214	-9.738e-05
947	0.0079717	99.0868	-0.0028982	-9.66067e-05
948	0.0085648	99.0919	-0.0026413	-8.80433e-05
949	0.0088138	99.0918	-0.0021769	-7.25633e-05
950	0.0089018	99.0919	-0.0019619	-6.53967e-05
951	0.0093328	99.0919	-0.0019168	-6.38933e-05
952	0.009396	99.0916	-0.0018796	-6.26533e-05
953	0.0096386	99.0943	-0.0022676	-7.55867e-05
954	0.010483	99.0943	-0.0024316	-8.10533e-05
955	0.010588	99.0946	-0.0024345	-8.115e-05
956	0.010999	99.0919	-0.0024345	-8.115e-05
957	0.011348	99.0919	-0.0024629	-8.20967e-05
958	0.011717	99.0919	-0.0028491	-9.497e-05
959	0.011385	99.0919	-0.0033416	-0.000111387
960	0.010604	99.0919	-0.0034083	-0.00011361
961	0.0095527	99.0919	-0.0033951	-0.00011317
962	0.0097835	99.0868	-0.0030984	-0.00010328
963	0.00868	99.0867	-0.0026439	-8.813e-05
964	0.0087532	99.0893	-0.0030635	-0.000102117
965	0.008686	99.0894	-0.0033541	-0.000111803
966	0.0082487	99.0894	-0.00317	-0.000105667
967	0.0080408	99.0894	-0.0032568	-0.00010856
968	0.0082796	99.0894	-0.003401	-0.000113367
969	0.0083639	99.0894	-0.0034652	-0.000115507
970	0.0090315	99.0894	-0.0037284	-0.00012428
971	0.0094747	99.0894	-0.0039762	-0.00013254
972	0.010009	99.0894	-0.0043098	-0.00014366
973	0.010269	99.0894	-0.0043819	-0.000146063
974	0.010888	99.0894	-0.0043866	-0.00014622
975	0.01163	99.0894	-0.0045185	-0.000150617
976	0.011685	99.0894	-0.0048013	-0.000160043
977	0.013454	99.0865	-0.0048684	-0.00016228
978	0.014132	99.0844	-0.004869	-0.0001623
979	0.01517	99.0844	-0.004869	-0.0001623
980	0.015596	99.0843	-0.004869	-0.0001623
981	0.016745	99.0819	-0.0049036	-0.000163453
982	0.017467	99.0819	-0.0051534	-0.00017178
983	0.018285	99.0819	-0.0053505	-0.00017835
984	0.019349	99.0819	-0.0055235	-0.000184117
985	0.02021	99.0819	-0.0058137	-0.00019379
986	0.0208	99.0843	-0.006082	-0.000202733
987	0.021875	99.0844	-0.0064051	-0.000213503
988	0.022684	99.0844	-0.0067156	-0.000223853
989	0.023568	99.0844	-0.0067191	-0.00022397
990	0.024374	99.0842	-0.0066459	-0.00022153
991	0.024846	99.0869	-0.0068125	-0.000227083
992	0.02563	99.0842	-0.0071533	-0.000238443
993	0.026812	99.0844	-0.0075813	-0.00025271
994	0.027944	99.0845	-0.0071304	-0.00023768
995	0.028406	99.0819	-0.00683	-0.000227667
996	0.029108	99.0819	-0.0068166	-0.00022722
997	0.030087	99.0819	-0.0068213	-0.000227377
998	0.030404	99.0819	-0.0070294	-0.000234313
999	0.031323	99.0819	-0.0076065	-0.00025355
1000	0.031528	99.0819	-0.0077874	-0.00025958
1001	0.032267	99.0819	-0.0077904	-0.00025968
1002	0.032705	99.0819	-0.007849	-0.000261633
1003	0.032793	99.0819	-0.0083281	-0.000277603
1004	0.034228	99.0819	-0.0087899	-0.000292997
1005	0.034704	99.0819	-0.0091307	-0.000304357
1006	0.035168	99.0847	-0.0095217	-0.00031739
1007	0.035517	99.0844	-0.0097721	-0.000325737
1008	0.036415	99.0844	-0.0097627	-0.000325423
1009	0.036647	99.0844	-0.0094049	-0.000313497
1010	0.037622	99.0823	-0.0095692	-0.000318973
1011	0.03796	99.0819	-0.0097682	-0.000325607
1012	0.038575	99.0792	-0.010031	-0.000334367
1013	0.038593	99.0794	-0.010242	-0.0003414
1014	0.039458	99.0789	-0.010491	-0.0003497
1015	0.04048	99.0769	-0.010716	-0.0003572
1016	0.041127	99.0769	-0.010952	-0.000365067
1017	0.041199	99.0746	-0.011177	-0.000372567
1018	0.042131	99.0772	-0.01144	-0.000381333
1019	0.043277	99.0719	-0.012526	-0.000417533
1020	0.043413	99.072	-0.01275	-0.000425
1021	0.044522	99.072	-0.012271	-0.000409033
1022	0.045107	99.072	-0.012494	-0.000416467
1023	0.045005	99.072	-0.013138	-0.000437933
1024	0.046917	99.0719	-0.013782	-0.0004594
1025	0.046863	99.0746	-0.014109	-0.0004703
1026	0.04739	99.0744	-0.014348	-0.000478267
1027	0.047983	99.0744	-0.014932	-0.000497733
1028	0.048507	99.0747	-0.015306	-0.0005102
1029	0.049284	99.0696	-0.015855	-0.0005285
1030	0.049389	99.0695	-0.016287	-0.0005429
1031	0.05129	99.0695	-0.016351	-0.000545033
1032	0.051461	99.0695	-0.016173	-0.0005391
1033	0.052111	99.0695	-0.016407	-0.0005469
1034	0.052413	99.0675	-0.016566	-0.0005522
1035	0.053173	99.0645	-0.016776	-0.0005592
1036	0.053437	99.0645	-0.017015	-0.000567167
1037	0.053614	99.0645	-0.01705	-0.000568333
1038	0.054355	99.0645	-0.016809	-0.0005603
1039	0.053679	99.0644	-0.016813	-0.000560433
1040	0.05479	99.059	-0.017577	-0.0005859
1041	0.055525	99.0595	-0.017994	-0.0005998
1042	0.055681	99.0622	-0.018202	-0.000606733
1043	0.055753	99.0593	-0.018776	-0.000625867
1044	0.056064	99.0595	-0.019003	-0.000633433
1045	0.057119	99.0595	-0.019342	-0.000644733
1046	0.057994	99.0568	-0.019928	-0.000664267
1047	0.057639	99.0595	-0.020296	-0.000676533
1048	0.058019	99.0595	-0.020443	-0.000681433
1049	0.058288	99.0595	-0.02046	-0.000682
1050	0.059225	99.0595	-0.020386	-0.000679533
1051	0.059558	99.0597	-0.020072	-0.000669067
1052	0.060044	99.0571	-0.020159	-0.000671967
1053	0.060697	99.057	-0.02017	-0.000672333
1054	0.061513	99.057	-0.020092	-0.000669733
1055	0.062834	99.057	-0.020366	-0.000678867
1056	0.063319	99.057	-0.020529	-0.0006843
1057	0.063257	99.057	-0.020623	-0.000687433
1058	0.063609	99.0548	-0.02091	-0.000697
1059	0.064639	99.0545	-0.02145	-0.000715
1060	0.064697	99.0548	-0.021673	-0.000722433
1061	0.06521	99.0521	-0.021507	-0.0007169
1062	0.065584	99.0514	-0.022003	-0.000733433
1063	0.065459	99.0495	-0.022473	-0.0007491
1064	0.065939	99.0471	-0.022408	-0.000746933
1065	0.066937	99.0471	-0.022402	-0.000746733
1066	0.06758	99.0437	-0.022641	-0.0007547
1067	0.067687	99.0421	-0.023444	-0.000781467
1068	0.067938	99.0421	-0.023567	-0.000785567
1069	0.068918	99.0421	-0.023379	-0.0007793
1070	0.068866	99.0473	-0.023214	-0.0007738
1071	0.069109	99.0471	-0.022946	-0.000764867
1072	0.070631	99.0471	-0.023015	-0.000767167
1073	0.070955	99.0471	-0.023298	-0.0007766
1074	0.071598	99.0469	-0.02337	-0.000779
1075	0.072243	99.0419	-0.023371	-0.000779033
1076	0.072869	99.0421	-0.023371	-0.000779033
1077	0.072864	99.0421	-0.023423	-0.000780767
1078	0.073909	99.0421	-0.023685	-0.0007895
1079	0.073872	99.0413	-0.023681	-0.000789367
1080	0.073701	99.0371	-0.023441	-0.000781367
1081	0.074156	99.0348	-0.023634	-0.0007878
1082	0.074714	99.0341	-0.024099	-0.0008033
1083	0.075222	99.0322	-0.024328	-0.000810933
1084	0.075756	99.0298	-0.024376	-0.000812533
1085	0.075798	99.0345	-0.024573	-0.0008191
1086	0.075344	99.033	-0.024512	-0.000817067
1087	0.076102	99.0322	-0.024388	-0.000812933
1088	0.07724	99.0313	-0.024622	-0.000820733
1089	0.078315	99.0296	-0.02481	-0.000827
1090	0.07873	99.0296	-0.024676	-0.000822533
1091	0.079923	99.0272	-0.024435	-0.0008145
1092	0.079898	99.0274	-0.024722	-0.000824067
1093	0.080573	99.0247	-0.024953	-0.000831767
1094	0.081295	99.0247	-0.025088	-0.000836267
1095	0.081895	99.0204	-0.024852	-0.0008284
1096	0.082814	99.0195	-0.024404	-0.000813467
1097	0.084309	99.0246	-0.024596	-0.000819867
1098	0.084539	99.0246	-0.025345	-0.000844833
1099	0.085219	99.0198	-0.025692	-0.0008564
1100	0.085023	99.0197	-0.026492	-0.000883067

## Sheet: FS-N2-40
	Atmosphere: Nitrogen			Material: Foundry sand
	Heating rate: 40 ℃/min
Temp./℃	DSC/(mW/mg)	Mass/%	DTG/(%/min)	DTG/(%/℃)
45	0.032582	99.9982	-0.0059319	-0.000148298
46	0.035232	99.9955	-0.0063651	-0.000159128
47	0.038093	99.993	-0.0067912	-0.00016978
48	0.040072	99.9948	-0.0074549	-0.000186373
49	0.042956	99.9933	-0.0080511	-0.000201278
50	0.045672	99.9952	-0.0085397	-0.000213493
51	0.04799	100	-0.0085291	-0.000213227
52	0.050716	99.9989	-0.0072773	-0.000181933
53	0.052872	99.997	-0.007094	-0.00017735
54	0.055436	100	-0.0079422	-0.000198555
55	0.057662	100.002	-0.0089338	-0.000223345
56	0.060451	100.008	-0.0095974	-0.000239935
57	0.062974	100.005	-0.010491	-0.000262275
58	0.065295	100.004	-0.011948	-0.0002987
59	0.067316	100.002	-0.013174	-0.00032935
60	0.069689	99.994	-0.014073	-0.000351825
61	0.071768	99.9969	-0.015357	-0.000383925
62	0.074156	99.9902	-0.016303	-0.000407575
63	0.075812	99.9876	-0.017084	-0.0004271
64	0.077876	99.9853	-0.017584	-0.0004396
65	0.080112	99.9811	-0.017761	-0.000444025
66	0.082032	99.9848	-0.017685	-0.000442125
67	0.084203	99.9823	-0.017281	-0.000432025
68	0.086049	99.9814	-0.017976	-0.0004494
69	0.088147	99.9801	-0.018426	-0.00046065
70	0.089606	99.9828	-0.018179	-0.000454475
71	0.091096	99.9876	-0.018297	-0.000457425
72	0.092998	99.9888	-0.018875	-0.000471875
73	0.094063	99.9879	-0.019915	-0.000497875
74	0.09606	99.9854	-0.020228	-0.0005057
75	0.097778	99.9823	-0.020107	-0.000502675
76	0.099382	99.9877	-0.02036	-0.000509
77	0.10144	99.9833	-0.021234	-0.00053085
78	0.10277	99.9832	-0.021511	-0.000537775
79	0.10483	99.9858	-0.022	-0.00055
80	0.10635	99.986	-0.022501	-0.000562525
81	0.10794	99.9831	-0.02272	-0.000568
82	0.10985	99.9831	-0.023039	-0.000575975
83	0.11151	99.9831	-0.023128	-0.0005782
84	0.11314	99.9829	-0.023371	-0.000584275
85	0.11482	99.9831	-0.024517	-0.000612925
86	0.11615	99.9827	-0.025077	-0.000626925
87	0.1176	99.9778	-0.024771	-0.000619275
88	0.11927	99.9807	-0.024609	-0.000615225
89	0.12073	99.9783	-0.024826	-0.00062065
90	0.12221	99.9831	-0.024813	-0.000620325
91	0.12343	99.9783	-0.024535	-0.000613375
92	0.12472	99.9734	-0.024756	-0.0006189
93	0.12554	99.9762	-0.025155	-0.000628875
94	0.12641	99.9741	-0.025049	-0.000626225
95	0.12749	99.9746	-0.025169	-0.000629225
96	0.12867	99.9715	-0.025327	-0.000633175
97	0.12957	99.9734	-0.025964	-0.0006491
98	0.13086	99.9709	-0.026177	-0.000654425
99	0.13193	99.9732	-0.026635	-0.000665875
100	0.13278	99.9681	-0.027556	-0.0006889
101	0.13431	99.9692	-0.028205	-0.000705125
102	0.1354	99.9707	-0.028765	-0.000719125
103	0.13544	99.9709	-0.029719	-0.000742975
104	0.13648	99.9683	-0.030808	-0.0007702
105	0.13737	99.9719	-0.031787	-0.000794675
106	0.13847	99.971	-0.032584	-0.0008146
107	0.13983	99.9685	-0.033646	-0.00084115
108	0.14044	99.9697	-0.034797	-0.000869925
109	0.14215	99.9686	-0.03577	-0.00089425
110	0.14364	99.9685	-0.036692	-0.0009173
111	0.14472	99.9665	-0.037508	-0.0009377
112	0.14616	99.9662	-0.038189	-0.000954725
113	0.14699	99.965	-0.038511	-0.000962775
114	0.14736	99.9614	-0.038564	-0.0009641
115	0.1484	99.9598	-0.038638	-0.00096595
116	0.14869	99.9583	-0.038838	-0.00097095
117	0.14985	99.9565	-0.038599	-0.000964975
118	0.15121	99.9539	-0.038379	-0.000959475
119	0.152	99.9515	-0.038387	-0.000959675
120	0.15335	99.9517	-0.038239	-0.000955975
121	0.15385	99.9519	-0.038118	-0.00095295
122	0.15477	99.9493	-0.038326	-0.00095815
123	0.15564	99.9493	-0.038635	-0.000965875
124	0.15671	99.9493	-0.038694	-0.00096735
125	0.15819	99.9471	-0.03877	-0.00096925
126	0.15863	99.9469	-0.039091	-0.000977275
127	0.15976	99.9469	-0.039438	-0.00098595
128	0.16064	99.9468	-0.039787	-0.000994675
129	0.16137	99.9417	-0.040041	-0.00100103
130	0.16182	99.942	-0.040447	-0.00101118
131	0.16222	99.9421	-0.041243	-0.00103108
132	0.16224	99.9421	-0.042208	-0.0010552
133	0.1625	99.9421	-0.043218	-0.00108045
134	0.1627	99.9421	-0.043973	-0.00109932
135	0.1635	99.9407	-0.044668	-0.0011167
136	0.16467	99.9373	-0.045603	-0.00114007
137	0.16606	99.9372	-0.046211	-0.00115528
138	0.16699	99.9352	-0.046778	-0.00116945
139	0.16765	99.9347	-0.047498	-0.00118745
140	0.16838	99.9309	-0.04816	-0.001204
141	0.16883	99.93	-0.04893	-0.00122325
142	0.16888	99.93	-0.049723	-0.00124308
143	0.16933	99.9297	-0.050424	-0.0012606
144	0.16964	99.9276	-0.050975	-0.00127437
145	0.1705	99.9276	-0.051556	-0.0012889
146	0.17139	99.9275	-0.052082	-0.00130205
147	0.17172	99.9253	-0.05267	-0.00131675
148	0.17211	99.9252	-0.053394	-0.00133485
149	0.17234	99.9252	-0.053931	-0.00134827
150	0.17222	99.925	-0.054266	-0.00135665
151	0.17328	99.9176	-0.055047	-0.00137617
152	0.17395	99.9179	-0.055867	-0.00139667
153	0.17446	99.9179	-0.05629	-0.00140725
154	0.17474	99.9179	-0.056644	-0.0014161
155	0.17494	99.9174	-0.056867	-0.00142168
156	0.17565	99.9156	-0.057258	-0.00143145
157	0.17595	99.9155	-0.058087	-0.00145217
158	0.17622	99.9155	-0.058725	-0.00146813
159	0.17666	99.9157	-0.059211	-0.00148028
160	0.1765	99.9106	-0.059865	-0.00149663
161	0.17722	99.9107	-0.060393	-0.00150983
162	0.17775	99.9107	-0.060764	-0.0015191
163	0.17802	99.908	-0.061559	-0.00153898
164	0.17793	99.9083	-0.062509	-0.00156272
165	0.1778	99.9082	-0.063252	-0.0015813
166	0.17812	99.9036	-0.063892	-0.0015973
167	0.17843	99.9037	-0.064228	-0.0016057
168	0.17696	99.901	-0.064636	-0.0016159
169	0.17751	99.8988	-0.065233	-0.00163083
170	0.17761	99.8962	-0.065783	-0.00164457
171	0.17805	99.8963	-0.06636	-0.001659
172	0.17795	99.8935	-0.066786	-0.00166965
173	0.17795	99.8937	-0.067144	-0.0016786
174	0.178	99.8886	-0.067941	-0.00169852
175	0.17779	99.8894	-0.068989	-0.00172472
176	0.17819	99.884	-0.06943	-0.00173575
177	0.17815	99.8837	-0.069577	-0.00173942
178	0.17719	99.882	-0.070163	-0.00175408
179	0.17699	99.8792	-0.070827	-0.00177067
180	0.17744	99.879	-0.071238	-0.00178095
181	0.17869	99.8758	-0.071621	-0.00179053
182	0.17804	99.8745	-0.071884	-0.0017971
183	0.17889	99.8719	-0.07209	-0.00180225
184	0.17965	99.8712	-0.072311	-0.00180777
185	0.18144	99.8696	-0.072337	-0.00180843
186	0.18169	99.8673	-0.072719	-0.00181798
187	0.18172	99.8675	-0.073574	-0.00183935
188	0.18073	99.862	-0.074188	-0.0018547
189	0.18072	99.8624	-0.074516	-0.0018629
190	0.18046	99.8624	-0.074582	-0.00186455
191	0.17811	99.8628	-0.074639	-0.00186597
192	0.18001	99.8572	-0.075012	-0.0018753
193	0.17953	99.8576	-0.075507	-0.00188768
194	0.17897	99.855	-0.076068	-0.0019017
195	0.17889	99.8556	-0.076858	-0.00192145
196	0.17829	99.8501	-0.077672	-0.0019418
197	0.17822	99.8504	-0.078219	-0.00195547
198	0.17816	99.8477	-0.078619	-0.00196547
199	0.17853	99.8482	-0.078937	-0.00197343
200	0.17881	99.8454	-0.079146	-0.00197865
201	0.17902	99.843	-0.079506	-0.00198765
202	0.17902	99.8423	-0.079827	-0.00199567
203	0.17927	99.8408	-0.079625	-0.00199063
204	0.17955	99.8408	-0.079591	-0.00198978
205	0.17984	99.8383	-0.080117	-0.00200293
206	0.18025	99.8375	-0.080659	-0.00201647
207	0.18055	99.8364	-0.08103	-0.00202575
208	0.18105	99.8309	-0.081317	-0.00203293
209	0.18085	99.831	-0.081514	-0.00203785
210	0.18039	99.8287	-0.081437	-0.00203593
211	0.18009	99.8239	-0.081377	-0.00203443
212	0.17984	99.8237	-0.081546	-0.00203865
213	0.18008	99.8188	-0.081656	-0.0020414
214	0.18014	99.8163	-0.081641	-0.00204103
215	0.18011	99.8168	-0.081418	-0.00203545
216	0.18029	99.814	-0.081241	-0.00203102
217	0.17955	99.8117	-0.081548	-0.0020387
218	0.17922	99.8107	-0.082017	-0.00205043
219	0.17895	99.8071	-0.082075	-0.00205187
220	0.17842	99.8074	-0.082073	-0.00205182
221	0.17817	99.802	-0.082498	-0.00206245
222	0.17786	99.7994	-0.082899	-0.00207247
223	0.1775	99.7987	-0.082933	-0.00207332
224	0.17752	99.7957	-0.083187	-0.00207968
225	0.17741	99.7927	-0.083773	-0.00209433
226	0.17774	99.7925	-0.084266	-0.00210665
227	0.17734	99.787	-0.084497	-0.00211243
228	0.17681	99.7862	-0.084618	-0.00211545
229	0.17621	99.7851	-0.084887	-0.00212218
230	0.17601	99.7804	-0.085164	-0.0021291
231	0.17605	99.7803	-0.08532	-0.002133
232	0.17584	99.7802	-0.085565	-0.00213912
233	0.17626	99.7772	-0.085989	-0.00214972
234	0.17676	99.7757	-0.086408	-0.0021602
235	0.17703	99.773	-0.086659	-0.00216648
236	0.17624	99.7682	-0.086649	-0.00216622
237	0.17603	99.7655	-0.086398	-0.00215995
238	0.17552	99.7641	-0.086338	-0.00215845
239	0.17478	99.7636	-0.086517	-0.00216293
240	0.17388	99.7605	-0.086739	-0.00216848
241	0.17303	99.7567	-0.087028	-0.0021757
242	0.1724	99.751	-0.08698	-0.0021745
243	0.17223	99.7518	-0.086622	-0.00216555
244	0.17118	99.7465	-0.08663	-0.00216575
245	0.17082	99.7465	-0.086763	-0.00216908
246	0.17085	99.7446	-0.086614	-0.00216535
247	0.17012	99.7403	-0.086571	-0.00216427
248	0.16961	99.7393	-0.086917	-0.00217293
249	0.16935	99.7369	-0.087253	-0.00218133
250	0.16966	99.737	-0.087352	-0.0021838
251	0.16939	99.7344	-0.087309	-0.00218272
252	0.16866	99.7317	-0.087048	-0.0021762
253	0.1679	99.7279	-0.086682	-0.00216705
254	0.16675	99.7272	-0.086348	-0.0021587
255	0.16477	99.7272	-0.086156	-0.0021539
256	0.16436	99.7251	-0.086064	-0.0021516
257	0.16373	99.721	-0.086121	-0.00215303
258	0.16354	99.7202	-0.086467	-0.00216168
259	0.16298	99.7176	-0.08677	-0.00216925
260	0.16278	99.7172	-0.086712	-0.0021678
261	0.16265	99.7155	-0.086519	-0.00216298
262	0.16252	99.7128	-0.086531	-0.00216328
263	0.1618	99.7102	-0.086709	-0.00216772
264	0.15917	99.7079	-0.08679	-0.00216975
265	0.15821	99.7073	-0.08664	-0.002166
266	0.15721	99.6979	-0.086256	-0.0021564
267	0.15453	99.6988	-0.086201	-0.00215503
268	0.15342	99.6932	-0.086767	-0.00216917
269	0.15305	99.6934	-0.087185	-0.00217963
270	0.15313	99.6928	-0.087097	-0.00217742
271	0.15234	99.6889	-0.086823	-0.00217058
272	0.15191	99.6859	-0.086673	-0.00216682
273	0.15087	99.6842	-0.08659	-0.00216475
274	0.14978	99.6792	-0.08634	-0.0021585
275	0.14917	99.6766	-0.086016	-0.0021504
276	0.14828	99.6739	-0.085805	-0.00214513
277	0.14807	99.6746	-0.085592	-0.0021398
278	0.14815	99.669	-0.085459	-0.00213647
279	0.14795	99.6693	-0.085385	-0.00213463
280	0.14704	99.6694	-0.085303	-0.00213258
281	0.14612	99.664	-0.085276	-0.0021319
282	0.14532	99.6644	-0.085275	-0.00213188
283	0.14514	99.6643	-0.085275	-0.00213188
284	0.14419	99.6601	-0.085287	-0.00213218
285	0.14242	99.6597	-0.085367	-0.00213417
286	0.14129	99.657	-0.085503	-0.00213758
287	0.14099	99.6572	-0.085618	-0.00214045
288	0.1404	99.6556	-0.085707	-0.00214268
289	0.13935	99.655	-0.085425	-0.00213562
290	0.13873	99.6524	-0.084961	-0.00212402
291	0.13789	99.6519	-0.084927	-0.00212318
292	0.1376	99.65	-0.084917	-0.00212293
293	0.13731	99.6484	-0.08474	-0.0021185
294	0.13709	99.6476	-0.084543	-0.00211357
295	0.13602	99.6476	-0.084205	-0.00210513
296	0.1346	99.6452	-0.083756	-0.0020939
297	0.13282	99.6434	-0.083391	-0.00208478
298	0.1315	99.6405	-0.08322	-0.0020805
299	0.13033	99.6403	-0.083024	-0.0020756
300	0.12996	99.6403	-0.082514	-0.00206285
301	0.12861	99.6351	-0.082038	-0.00205095
302	0.12846	99.6355	-0.082086	-0.00205215
303	0.12788	99.6354	-0.082368	-0.0020592
304	0.12736	99.6317	-0.082364	-0.0020591
305	0.12729	99.6307	-0.082034	-0.00205085
306	0.12635	99.6275	-0.081628	-0.0020407
307	0.12541	99.6228	-0.081186	-0.00202965
308	0.12454	99.621	-0.080778	-0.00201945
309	0.12296	99.6192	-0.080463	-0.00201158
310	0.12225	99.6186	-0.080147	-0.00200367
311	0.12117	99.6187	-0.080038	-0.00200095
312	0.12061	99.6152	-0.080014	-0.00200035
313	0.11919	99.6141	-0.079749	-0.00199373
314	0.11849	99.6112	-0.079696	-0.0019924
315	0.11757	99.6113	-0.079694	-0.00199235
316	0.11649	99.6088	-0.079351	-0.00198378
317	0.11531	99.6089	-0.079046	-0.00197615
318	0.11398	99.6077	-0.078868	-0.0019717
319	0.11346	99.6066	-0.078594	-0.00196485
320	0.1131	99.6068	-0.078165	-0.00195413
321	0.11271	99.6018	-0.077756	-0.0019439
322	0.11282	99.6017	-0.077334	-0.00193335
323	0.11265	99.6016	-0.077076	-0.0019269
324	0.11166	99.5982	-0.077072	-0.0019268
325	0.11114	99.5969	-0.077222	-0.00193055
326	0.10988	99.5969	-0.077281	-0.00193202
327	0.11001	99.5945	-0.077176	-0.0019294
328	0.10932	99.5892	-0.077226	-0.00193065
329	0.10806	99.5899	-0.077414	-0.00193535
330	0.10765	99.5872	-0.077485	-0.00193713
331	0.10671	99.5871	-0.077362	-0.00193405
332	0.10577	99.5849	-0.077123	-0.00192808
333	0.10624	99.5836	-0.076804	-0.0019201
334	0.10556	99.5824	-0.076779	-0.00191947
335	0.10423	99.5801	-0.077051	-0.00192627
336	0.10361	99.58	-0.076895	-0.00192238
337	0.10276	99.5772	-0.076688	-0.0019172
338	0.10206	99.575	-0.077068	-0.0019267
339	0.10121	99.571	-0.07745	-0.00193625
340	0.10049	99.5704	-0.077399	-0.00193497
341	0.099622	99.5703	-0.077304	-0.0019326
342	0.099114	99.5688	-0.077329	-0.00193322
343	0.098167	99.5656	-0.077289	-0.00193222
344	0.097027	99.5636	-0.077178	-0.00192945
345	0.096165	99.5631	-0.076803	-0.00192007
346	0.096013	99.5631	-0.076228	-0.0019057
347	0.095526	99.5626	-0.075775	-0.00189437
348	0.09481	99.5555	-0.075546	-0.00188865
349	0.094441	99.5559	-0.075661	-0.00189153
350	0.093925	99.5558	-0.075834	-0.00189585
351	0.092754	99.5535	-0.07593	-0.00189825
352	0.092063	99.5537	-0.076071	-0.00190178
353	0.091436	99.5508	-0.075908	-0.0018977
354	0.090355	99.551	-0.075277	-0.00188193
355	0.089612	99.5485	-0.074991	-0.00187477
356	0.088975	99.5486	-0.075116	-0.0018779
357	0.088244	99.5486	-0.075094	-0.00187735
358	0.087638	99.5468	-0.075171	-0.00187928
359	0.086856	99.5462	-0.075612	-0.0018903
360	0.085999	99.5436	-0.075935	-0.00189838
361	0.085426	99.5429	-0.076071	-0.00190178
362	0.084605	99.5414	-0.07635	-0.00190875
363	0.084113	99.5416	-0.07665	-0.00191625
364	0.083386	99.539	-0.076939	-0.00192347
365	0.082587	99.5386	-0.077414	-0.00193535
366	0.082279	99.5338	-0.077968	-0.0019492
367	0.081153	99.5306	-0.078605	-0.00196512
368	0.080341	99.5293	-0.079142	-0.00197855
369	0.079446	99.5293	-0.079564	-0.0019891
370	0.078543	99.5276	-0.080058	-0.00200145
371	0.077419	99.5246	-0.080506	-0.00201265
372	0.0765	99.5249	-0.080927	-0.00202317
373	0.075333	99.5197	-0.081375	-0.00203438
374	0.073738	99.5197	-0.08195	-0.00204875
375	0.073496	99.5196	-0.082565	-0.00206412
376	0.071966	99.5197	-0.082996	-0.0020749
377	0.07134	99.5198	-0.083275	-0.00208187
378	0.07129	99.5149	-0.083797	-0.00209493
379	0.070687	99.5148	-0.084491	-0.00211227
380	0.070335	99.5149	-0.084732	-0.0021183
381	0.069762	99.5151	-0.084996	-0.0021249
382	0.069022	99.5102	-0.08577	-0.00214425
383	0.067784	99.5047	-0.086224	-0.0021556
384	0.067601	99.5051	-0.086155	-0.00215387
385	0.066583	99.5051	-0.085887	-0.00214718
386	0.065483	99.5026	-0.085453	-0.00213633
387	0.065846	99.5028	-0.085397	-0.00213493
388	0.065643	99.503	-0.085941	-0.00214853
389	0.064775	99.5002	-0.086527	-0.00216318
390	0.063815	99.5004	-0.086913	-0.00217283
391	0.062885	99.4977	-0.087051	-0.00217628
392	0.062812	99.498	-0.086995	-0.00217488
393	0.060948	99.4986	-0.087214	-0.00218035
394	0.060758	99.4907	-0.087657	-0.00219142
395	0.058761	99.4908	-0.088078	-0.00220195
396	0.057498	99.4881	-0.088565	-0.00221412
397	0.056698	99.4885	-0.089368	-0.0022342
398	0.055915	99.4859	-0.090374	-0.00225935
399	0.055266	99.4861	-0.090972	-0.0022743
400	0.053873	99.4806	-0.091094	-0.00227735
401	0.053446	99.481	-0.091453	-0.00228633
402	0.052275	99.4809	-0.091978	-0.00229945
403	0.05106	99.4764	-0.09219	-0.00230475
404	0.050252	99.4767	-0.092448	-0.0023112
405	0.04994	99.4711	-0.092828	-0.0023207
406	0.048628	99.4689	-0.092931	-0.00232328
407	0.047752	99.4682	-0.09297	-0.00232425
408	0.046597	99.4651	-0.093456	-0.0023364
409	0.045741	99.4641	-0.094236	-0.0023559
410	0.044914	99.4616	-0.094676	-0.0023669
411	0.044293	99.4609	-0.095	-0.002375
412	0.043481	99.4594	-0.095332	-0.0023833
413	0.042632	99.4596	-0.095524	-0.0023881
414	0.041605	99.4546	-0.095655	-0.00239138
415	0.041022	99.4544	-0.095756	-0.0023939
416	0.040311	99.4509	-0.095819	-0.00239548
417	0.039378	99.445	-0.096126	-0.00240315
418	0.038334	99.4448	-0.096692	-0.0024173
419	0.037366	99.4447	-0.097197	-0.00242993
420	0.036466	99.441	-0.09758	-0.0024395
421	0.035583	99.44	-0.097716	-0.0024429
422	0.034977	99.4373	-0.097824	-0.0024456
423	0.033888	99.4364	-0.098047	-0.00245117
424	0.033454	99.4326	-0.098441	-0.00246102
425	0.03253	99.4302	-0.098802	-0.00247005
426	0.031541	99.4305	-0.098771	-0.00246927
427	0.031038	99.4277	-0.098766	-0.00246915
428	0.029807	99.4257	-0.099099	-0.00247748
429	0.028987	99.4227	-0.099407	-0.00248518
430	0.028589	99.4212	-0.099901	-0.00249753
431	0.027641	99.4156	-0.10048	-0.002512
432	0.027056	99.4158	-0.10092	-0.002523
433	0.026117	99.4144	-0.10147	-0.00253675
434	0.024676	99.4114	-0.10258	-0.0025645
435	0.024029	99.4086	-0.10381	-0.00259525
436	0.023489	99.4079	-0.10443	-0.00261075
437	0.022829	99.4042	-0.10453	-0.00261325
438	0.021533	99.4015	-0.10463	-0.00261575
439	0.020907	99.3989	-0.10481	-0.00262025
440	0.020067	99.3968	-0.10505	-0.00262625
441	0.019418	99.3942	-0.10547	-0.00263675
442	0.01872	99.3919	-0.10592	-0.002648
443	0.018286	99.3867	-0.10622	-0.0026555
444	0.017871	99.385	-0.10625	-0.00265625
445	0.017155	99.3796	-0.10619	-0.00265475
446	0.016097	99.3772	-0.10661	-0.00266525
447	0.015897	99.3743	-0.1071	-0.0026775
448	0.015097	99.3701	-0.10715	-0.00267875
449	0.014301	99.3675	-0.10729	-0.00268225
450	0.013604	99.3623	-0.10768	-0.002692
451	0.01302	99.3632	-0.10817	-0.00270425
452	0.012481	99.358	-0.10873	-0.00271825
453	0.011891	99.3554	-0.10934	-0.0027335
454	0.011412	99.3507	-0.10981	-0.00274525
455	0.010383	99.3484	-0.10979	-0.00274475
456	0.010047	99.3458	-0.10986	-0.0027465
457	0.0094122	99.3412	-0.1104	-0.00276
458	0.0083781	99.3416	-0.11077	-0.00276925
459	0.0080301	99.3363	-0.11082	-0.0027705
460	0.0073872	99.3316	-0.11066	-0.0027665
461	0.0067759	99.3287	-0.11082	-0.0027705
462	0.0060116	99.3268	-0.11166	-0.0027915
463	0.0058459	99.3239	-0.11256	-0.002814
464	0.0054988	99.3231	-0.11321	-0.00283025
465	0.0045991	99.3204	-0.11371	-0.00284275
466	0.0040576	99.3145	-0.11432	-0.002858
467	0.0035818	99.3149	-0.1149	-0.0028725
468	0.0027838	99.3093	-0.11545	-0.00288625
469	0.0024166	99.3096	-0.11593	-0.00289825
470	0.001805	99.3043	-0.11584	-0.002896
471	0.0013995	99.3032	-0.11545	-0.00288625
472	0.00084364	99.3001	-0.11576	-0.002894
473	0.00022637	99.2973	-0.11648	-0.002912
474	-0.00035333	99.2954	-0.11695	-0.00292375
475	-0.00077394	99.2877	-0.11757	-0.00293925
476	-0.0011672	99.2827	-0.11816	-0.002954
477	-0.0017223	99.2829	-0.11842	-0.0029605
478	-0.0020904	99.2791	-0.11876	-0.002969
479	-0.0023177	99.278	-0.11883	-0.00297075
480	-0.0028674	99.2748	-0.11874	-0.0029685
481	-0.0032932	99.2715	-0.11863	-0.00296575
482	-0.0036228	99.2685	-0.11864	-0.002966
483	-0.0041315	99.2668	-0.11921	-0.00298025
484	-0.0045945	99.2638	-0.11979	-0.00299475
485	-0.0050362	99.2587	-0.11978	-0.0029945
486	-0.0052891	99.2543	-0.11954	-0.0029885
487	-0.005375	99.2546	-0.11954	-0.0029885
488	-0.0070783	99.2493	-0.11964	-0.002991
489	-0.0079349	99.2466	-0.11944	-0.002986
490	-0.0083219	99.2452	-0.11932	-0.002983
491	-0.0083401	99.2445	-0.11992	-0.002998
492	-0.0086226	99.2423	-0.12031	-0.00300775
493	-0.0092746	99.2399	-0.11978	-0.0029945
494	-0.0096698	99.23	-0.11929	-0.00298225
495	-0.010207	99.2299	-0.11931	-0.00298275
496	-0.010406	99.2268	-0.11929	-0.00298225
497	-0.010884	99.2252	-0.11902	-0.0029755
498	-0.011052	99.2222	-0.11877	-0.00296925
499	-0.011672	99.2206	-0.11852	-0.002963
500	-0.011844	99.2179	-0.11841	-0.00296025
501	-0.012576	99.2156	-0.11889	-0.00297225
502	-0.012556	99.2103	-0.1196	-0.00299
503	-0.012701	99.2106	-0.11995	-0.00299875
504	-0.012948	99.2053	-0.11962	-0.0029905
505	-0.013604	99.2057	-0.11889	-0.00297225
506	-0.014184	99.2011	-0.11842	-0.0029605
507	-0.0141	99.1985	-0.11828	-0.002957
508	-0.014218	99.1959	-0.11812	-0.002953
509	-0.014449	99.1938	-0.11758	-0.0029395
510	-0.014968	99.187	-0.1171	-0.0029275
511	-0.015517	99.1847	-0.11707	-0.00292675
512	-0.016058	99.1793	-0.11678	-0.0029195
513	-0.016479	99.1792	-0.11606	-0.0029015
514	-0.01697	99.1758	-0.11529	-0.00288225
515	-0.017232	99.1745	-0.11466	-0.0028665
516	-0.017718	99.1717	-0.11444	-0.002861
517	-0.017846	99.1684	-0.11431	-0.00285775
518	-0.018411	99.1671	-0.11379	-0.00284475
519	-0.018644	99.1629	-0.11321	-0.00283025
520	-0.019323	99.16	-0.11295	-0.00282375
521	-0.019476	99.1575	-0.11285	-0.00282125
522	-0.019788	99.1522	-0.11258	-0.0028145
523	-0.020206	99.1507	-0.11195	-0.00279875
524	-0.020333	99.15	-0.1113	-0.0027825
525	-0.020737	99.1469	-0.11076	-0.002769
526	-0.021005	99.1408	-0.11009	-0.00275225
527	-0.021672	99.138	-0.1094	-0.002735
528	-0.021716	99.1369	-0.10874	-0.0027185
529	-0.021738	99.1361	-0.10812	-0.002703
530	-0.022266	99.1311	-0.10749	-0.00268725
531	-0.022398	99.1309	-0.10692	-0.002673
532	-0.022854	99.1262	-0.10661	-0.00266525
533	-0.023105	99.1264	-0.10627	-0.00265675
534	-0.023273	99.1241	-0.10536	-0.002634
535	-0.023359	99.119	-0.10426	-0.0026065
536	-0.023439	99.1194	-0.10373	-0.00259325
537	-0.023761	99.1141	-0.1037	-0.0025925
538	-0.023884	99.1093	-0.10345	-0.00258625
539	-0.023966	99.104	-0.10285	-0.00257125
540	-0.023948	99.1044	-0.10212	-0.002553
541	-0.024013	99.0988	-0.10184	-0.002546
542	-0.024254	99.0971	-0.10193	-0.00254825
543	-0.024438	99.0927	-0.1017	-0.0025425
544	-0.024678	99.0897	-0.10139	-0.00253475
545	-0.024761	99.0884	-0.10089	-0.00252225
546	-0.025003	99.0876	-0.1004	-0.00251
547	-0.025134	99.0855	-0.10015	-0.00250375
548	-0.024757	99.0775	-0.099968	-0.0024992
549	-0.024488	99.078	-0.099219	-0.00248048
550	-0.024778	99.0731	-0.098163	-0.00245408
551	-0.02468	99.0681	-0.097664	-0.0024416
552	-0.02494	99.0675	-0.097489	-0.00243723
553	-0.024711	99.0638	-0.097144	-0.0024286
554	-0.024597	99.061	-0.096563	-0.00241407
555	-0.02407	99.0583	-0.09583	-0.00239575
556	-0.024232	99.0569	-0.095118	-0.00237795
557	-0.023839	99.0562	-0.094592	-0.0023648
558	-0.023657	99.0489	-0.094006	-0.00235015
559	-0.02322	99.0439	-0.093207	-0.00233017
560	-0.022615	99.0441	-0.092414	-0.00231035
561	-0.02201	99.044	-0.091998	-0.00229995
562	-0.021407	99.0397	-0.091642	-0.00229105
563	-0.020482	99.0393	-0.091223	-0.00228057
564	-0.019773	99.0393	-0.091067	-0.00227667
565	-0.01865	99.0393	-0.091366	-0.00228415
566	-0.017205	99.0293	-0.091538	-0.00228845
567	-0.015158	99.0299	-0.091135	-0.00227838
568	-0.012536	99.0273	-0.090229	-0.00225573
569	-0.0087168	99.0275	-0.089569	-0.00223923
570	-0.0020398	99.0247	-0.089912	-0.0022478
571	0.012372	99.0222	-0.090053	-0.00225132
572	0.034236	99.0223	-0.089513	-0.00223782
573	0.048105	99.0199	-0.088854	-0.00222135
574	0.047933	99.0202	-0.088266	-0.00220665
575	0.040812	99.0178	-0.087601	-0.00219002
576	0.031471	99.0102	-0.087055	-0.00217637
577	0.022861	99.0075	-0.087365	-0.00218412
578	0.014766	99.0055	-0.087712	-0.0021928
579	0.0074916	99.0055	-0.087351	-0.00218377
580	0.00020231	99.0054	-0.08663	-0.00216575
581	-0.0060038	99.0004	-0.085678	-0.00214195
582	-0.011353	99.0006	-0.08486	-0.0021215
583	-0.016602	99.0007	-0.084024	-0.0021006
584	-0.021526	99.0006	-0.082729	-0.00206822
585	-0.026032	98.9973	-0.081564	-0.0020391
586	-0.03047	98.9958	-0.081174	-0.00202935
587	-0.034396	98.9959	-0.081009	-0.00202522
588	-0.037638	98.9959	-0.080497	-0.00201242
589	-0.041183	98.9959	-0.079879	-0.00199698
590	-0.043835	98.9964	-0.07949	-0.00198725
591	-0.046109	98.991	-0.078972	-0.0019743
592	-0.049068	98.9902	-0.078161	-0.00195402
593	-0.051185	98.9886	-0.077216	-0.0019304
594	-0.05377	98.9862	-0.076403	-0.00191008
595	-0.056163	98.9808	-0.075819	-0.00189547
596	-0.058122	98.9791	-0.075536	-0.0018884
597	-0.060319	98.9789	-0.075558	-0.00188895
598	-0.062383	98.9792	-0.075228	-0.0018807
599	-0.063951	98.9766	-0.074356	-0.0018589
600	-0.065653	98.9766	-0.073406	-0.00183515
601	-0.067409	98.9767	-0.072867	-0.00182168
602	-0.068606	98.9741	-0.072517	-0.00181292
603	-0.070524	98.9724	-0.072281	-0.00180702
604	-0.07164	98.9717	-0.072296	-0.0018074
605	-0.073015	98.9722	-0.072331	-0.00180828
606	-0.07456	98.9667	-0.072126	-0.00180315
607	-0.075871	98.9669	-0.071995	-0.00179988
608	-0.076773	98.9669	-0.071764	-0.0017941
609	-0.078396	98.9669	-0.071426	-0.00178565
610	-0.078962	98.9673	-0.070921	-0.00177302
611	-0.080478	98.9619	-0.070193	-0.00175483
612	-0.081552	98.9621	-0.069586	-0.00173965
613	-0.082188	98.9621	-0.068973	-0.00172433
614	-0.082886	98.9621	-0.068251	-0.00170628
615	-0.083357	98.9557	-0.067335	-0.00168338
616	-0.084177	98.9548	-0.066857	-0.00167143
617	-0.085049	98.9544	-0.066821	-0.00167053
618	-0.085295	98.9524	-0.066615	-0.00166537
619	-0.085724	98.9524	-0.066187	-0.00165467
620	-0.086443	98.9498	-0.065598	-0.00163995
621	-0.086875	98.9504	-0.064683	-0.00161708
622	-0.087418	98.9453	-0.06394	-0.0015985
623	-0.088112	98.9451	-0.063358	-0.00158395
624	-0.088849	98.9427	-0.062765	-0.00156912
625	-0.088831	98.9401	-0.062284	-0.0015571
626	-0.089227	98.9405	-0.061573	-0.00153933
627	-0.089647	98.938	-0.060897	-0.00152242
628	-0.090056	98.9379	-0.06055	-0.00151375
629	-0.090675	98.9379	-0.060306	-0.00150765
630	-0.091328	98.9381	-0.059988	-0.0014997
631	-0.091977	98.9355	-0.059444	-0.0014861
632	-0.092558	98.9355	-0.058517	-0.00146292
633	-0.092997	98.9357	-0.057905	-0.00144762
634	-0.093506	98.9306	-0.057789	-0.00144473
635	-0.093914	98.9306	-0.057617	-0.00144042
636	-0.094431	98.9283	-0.057262	-0.00143155
637	-0.095026	98.9282	-0.057061	-0.00142653
638	-0.095377	98.9267	-0.056704	-0.0014176
639	-0.095726	98.9211	-0.055845	-0.00139613
640	-0.096135	98.921	-0.055174	-0.00137935
641	-0.096631	98.9186	-0.055007	-0.00137517
642	-0.096912	98.9185	-0.054857	-0.00137143
643	-0.097291	98.9146	-0.054461	-0.00136153
644	-0.09788	98.909	-0.053998	-0.00134995
645	-0.098206	98.909	-0.053795	-0.00134488
646	-0.098682	98.909	-0.053753	-0.00134383
647	-0.099058	98.909	-0.053462	-0.00133655
648	-0.099073	98.909	-0.052648	-0.0013162
649	-0.099704	98.9089	-0.05145	-0.00128625
650	-0.10021	98.9053	-0.050552	-0.0012638
651	-0.10023	98.8994	-0.050333	-0.00125833
652	-0.10044	98.8993	-0.05061	-0.00126525
653	-0.10085	98.8993	-0.050746	-0.00126865
654	-0.10103	98.8993	-0.050638	-0.00126595
655	-0.10117	98.8993	-0.050719	-0.00126797
656	-0.10199	98.8993	-0.050976	-0.0012744
657	-0.10219	98.8993	-0.051367	-0.00128418
658	-0.10226	98.8995	-0.051573	-0.00128933
659	-0.1022	98.8941	-0.051552	-0.0012888
660	-0.10324	98.8945	-0.051569	-0.00128922
661	-0.10353	98.8945	-0.051576	-0.0012894
662	-0.10376	98.8945	-0.051497	-0.00128743
663	-0.10395	98.8936	-0.051189	-0.00127973
664	-0.1037	98.8921	-0.051094	-0.00127735
665	-0.10431	98.892	-0.051394	-0.00128485
666	-0.1045	98.892	-0.051325	-0.00128312
667	-0.10452	98.8921	-0.050618	-0.00126545
668	-0.10459	98.8923	-0.049712	-0.0012428
669	-0.10441	98.8897	-0.049283	-0.00123208
670	-0.10489	98.885	-0.049308	-0.0012327
671	-0.105	98.8848	-0.049172	-0.0012293
672	-0.1054	98.8848	-0.048908	-0.0012227
673	-0.10546	98.8851	-0.04874	-0.0012185
674	-0.10565	98.8825	-0.048438	-0.00121095
675	-0.10562	98.8823	-0.048031	-0.00120077
676	-0.1059	98.8774	-0.047652	-0.0011913
677	-0.10654	98.8778	-0.047326	-0.00118315
678	-0.10689	98.8752	-0.046727	-0.00116818
679	-0.10702	98.8741	-0.045966	-0.00114915
680	-0.10724	98.8706	-0.045519	-0.00113797
681	-0.10717	98.8696	-0.04543	-0.00113575
682	-0.10751	98.8679	-0.045578	-0.00113945
683	-0.10788	98.8679	-0.04564	-0.001141
684	-0.10815	98.8646	-0.045471	-0.00113678
685	-0.10809	98.8631	-0.045385	-0.00113462
686	-0.10856	98.8631	-0.045205	-0.00113013
687	-0.10879	98.8631	-0.044514	-0.00111285
688	-0.10899	98.863	-0.043924	-0.0010981
689	-0.10896	98.8587	-0.044068	-0.0011017
690	-0.10936	98.8559	-0.044118	-0.00110295
691	-0.1095	98.8559	-0.043935	-0.00109837
692	-0.10992	98.8558	-0.043596	-0.0010899
693	-0.1102	98.8558	-0.043094	-0.00107735
694	-0.10954	98.8533	-0.042843	-0.00107107
695	-0.11011	98.8535	-0.043326	-0.00108315
696	-0.11055	98.8533	-0.04379	-0.00109475
697	-0.11049	98.8487	-0.043594	-0.00108985
698	-0.11066	98.8486	-0.043165	-0.00107913
699	-0.11087	98.8486	-0.042806	-0.00107015
700	-0.1114	98.8488	-0.042655	-0.00106638
701	-0.11148	98.8462	-0.042615	-0.00106537
702	-0.11172	98.8461	-0.042448	-0.0010612
703	-0.11137	98.8409	-0.042136	-0.0010534
704	-0.11173	98.8413	-0.041928	-0.0010482
705	-0.11179	98.8414	-0.041593	-0.00103982
706	-0.11206	98.8413	-0.040978	-0.00102445
707	-0.11202	98.8389	-0.040528	-0.0010132
708	-0.11265	98.8389	-0.040452	-0.0010113
709	-0.11295	98.8389	-0.041095	-0.00102738
710	-0.11292	98.8392	-0.041388	-0.0010347
711	-0.11279	98.8365	-0.040842	-0.00102105
712	-0.11307	98.8367	-0.040451	-0.00101128
713	-0.11317	98.834	-0.040099	-0.00100248
714	-0.11326	98.8341	-0.039534	-0.00098835
715	-0.11352	98.8341	-0.038398	-0.00095995
716	-0.11409	98.8341	-0.037405	-0.000935125
717	-0.11437	98.8344	-0.037157	-0.000928925
718	-0.11486	98.8317	-0.037255	-0.000931375
719	-0.11454	98.8317	-0.037553	-0.000938825
720	-0.11496	98.8317	-0.037742	-0.00094355
721	-0.11524	98.8317	-0.037373	-0.000934325
722	-0.11558	98.8318	-0.036331	-0.000908275
723	-0.11591	98.8296	-0.035692	-0.0008923
724	-0.11629	98.8268	-0.035715	-0.000892875
725	-0.11672	98.8271	-0.035791	-0.000894775
726	-0.11715	98.8246	-0.036134	-0.00090335
727	-0.11727	98.8221	-0.037012	-0.0009253
728	-0.11802	98.8219	-0.037676	-0.0009419
729	-0.1182	98.8168	-0.03773	-0.00094325
730	-0.11852	98.8156	-0.037439	-0.000935975
731	-0.11867	98.8148	-0.037365	-0.000934125
732	-0.11945	98.8148	-0.037658	-0.00094145
733	-0.11924	98.8148	-0.037797	-0.000944925
734	-0.11906	98.8148	-0.037741	-0.000943525
735	-0.11931	98.8148	-0.037737	-0.000943425
736	-0.11937	98.8097	-0.038039	-0.000950975
737	-0.11953	98.8075	-0.038385	-0.000959625
738	-0.11932	98.8076	-0.038497	-0.000962425
739	-0.12016	98.8076	-0.038394	-0.00095985
740	-0.12001	98.8075	-0.03786	-0.0009465
741	-0.11997	98.8057	-0.037001	-0.000925025
742	-0.12042	98.8051	-0.036525	-0.000913125
743	-0.12021	98.8052	-0.03644	-0.000911
744	-0.12021	98.8052	-0.036326	-0.00090815
745	-0.12047	98.8052	-0.036053	-0.000901325
746	-0.12076	98.8052	-0.035928	-0.0008982
747	-0.1214	98.8052	-0.035726	-0.00089315
748	-0.12096	98.8052	-0.035178	-0.00087945
749	-0.12137	98.8052	-0.034731	-0.000868275
750	-0.12192	98.8052	-0.034523	-0.000863075
751	-0.12236	98.8078	-0.034197	-0.000854925
752	-0.1229	98.8076	-0.033648	-0.0008412
753	-0.12306	98.8075	-0.033222	-0.00083055
754	-0.12345	98.8039	-0.033144	-0.0008286
755	-0.12376	98.8027	-0.033028	-0.0008257
756	-0.12415	98.8027	-0.032585	-0.000814625
757	-0.12435	98.8027	-0.032354	-0.00080885
758	-0.12426	98.8027	-0.032477	-0.000811925
759	-0.12482	98.8027	-0.032909	-0.000822725
760	-0.12481	98.8003	-0.032836	-0.0008209
761	-0.1258	98.7979	-0.032076	-0.0008019
762	-0.12569	98.7979	-0.03168	-0.000792
763	-0.12642	98.7979	-0.031632	-0.0007908
764	-0.12638	98.7979	-0.031571	-0.000789275
765	-0.1264	98.7978	-0.031319	-0.000782975
766	-0.12674	98.7926	-0.031038	-0.00077595
767	-0.1268	98.7895	-0.030952	-0.0007738
768	-0.12717	98.7882	-0.030947	-0.000773675
769	-0.12736	98.7883	-0.030947	-0.000773675
770	-0.12755	98.7883	-0.03093	-0.00077325
771	-0.12783	98.7883	-0.030782	-0.00076955
772	-0.1282	98.7883	-0.030466	-0.00076165
773	-0.12826	98.7883	-0.030141	-0.000753525
774	-0.12858	98.7883	-0.0296	-0.00074
775	-0.12864	98.7883	-0.029192	-0.0007298
776	-0.12853	98.7883	-0.029345	-0.000733625
777	-0.12908	98.7883	-0.029476	-0.0007369
778	-0.12956	98.7883	-0.029293	-0.000732325
779	-0.12959	98.7883	-0.029219	-0.000730475
780	-0.12989	98.7893	-0.029428	-0.0007357
781	-0.12997	98.7788	-0.029434	-0.00073585
782	-0.13038	98.7786	-0.029137	-0.000728425
783	-0.13042	98.7786	-0.028807	-0.000720175
784	-0.13057	98.7786	-0.028468	-0.0007117
785	-0.13034	98.7786	-0.028242	-0.00070605
786	-0.13066	98.7786	-0.028197	-0.000704925
787	-0.13088	98.7786	-0.028183	-0.000704575
788	-0.13112	98.7786	-0.028072	-0.0007018
789	-0.13076	98.7786	-0.027938	-0.00069845
790	-0.13077	98.7779	-0.028051	-0.000701275
791	-0.13076	98.7762	-0.028177	-0.000704425
792	-0.13088	98.7762	-0.028176	-0.0007044
793	-0.13081	98.7762	-0.028004	-0.0007001
794	-0.13034	98.7759	-0.027575	-0.000689375
795	-0.13035	98.7738	-0.027094	-0.00067735
796	-0.13033	98.7738	-0.026723	-0.000668075
797	-0.13026	98.7737	-0.026231	-0.000655775
798	-0.12982	98.7711	-0.025688	-0.0006422
799	-0.13008	98.7666	-0.02532	-0.000633
800	-0.12973	98.7665	-0.024717	-0.000617925
801	-0.12901	98.7665	-0.02409	-0.00060225
802	-0.12909	98.7642	-0.024178	-0.00060445
803	-0.12884	98.7614	-0.024607	-0.000615175
804	-0.12875	98.7617	-0.02475	-0.00061875
805	-0.12859	98.7617	-0.024746	-0.00061865
806	-0.12816	98.7619	-0.024549	-0.000613725
807	-0.1277	98.7595	-0.023849	-0.000596225
808	-0.12752	98.7568	-0.02314	-0.0005785
809	-0.127	98.7569	-0.023155	-0.000578875
810	-0.12681	98.7569	-0.023695	-0.000592375
811	-0.12635	98.7569	-0.024322	-0.00060805
812	-0.12623	98.7569	-0.02441	-0.00061025
813	-0.12602	98.7569	-0.024165	-0.000604125
814	-0.12589	98.7569	-0.024093	-0.000602325
815	-0.12527	98.7569	-0.02432	-0.000608
816	-0.12522	98.7569	-0.024927	-0.000623175
817	-0.12465	98.7569	-0.025365	-0.000634125
818	-0.12514	98.7543	-0.025444	-0.0006361
819	-0.12456	98.7545	-0.025445	-0.000636125
820	-0.12403	98.7545	-0.025453	-0.000636325
821	-0.12478	98.7543	-0.025563	-0.000639075
822	-0.12415	98.7521	-0.025864	-0.0006466
823	-0.12368	98.752	-0.026082	-0.00065205
824	-0.12315	98.752	-0.025979	-0.000649475
825	-0.12327	98.7521	-0.025453	-0.000636325
826	-0.12339	98.7494	-0.025063	-0.000626575
827	-0.12324	98.7496	-0.025236	-0.0006309
828	-0.12274	98.7496	-0.025418	-0.00063545
829	-0.12314	98.7496	-0.025439	-0.000635975
830	-0.12305	98.7473	-0.0253	-0.0006325
831	-0.123	98.7448	-0.024764	-0.0006191
832	-0.12268	98.7448	-0.024246	-0.00060615
833	-0.12274	98.7448	-0.024287	-0.000607175
834	-0.12202	98.7448	-0.024596	-0.0006149
835	-0.12196	98.7448	-0.024714	-0.00061785
836	-0.12174	98.7448	-0.024431	-0.000610775
837	-0.12131	98.7448	-0.023608	-0.0005902
838	-0.12103	98.7453	-0.022776	-0.0005694
839	-0.12025	98.74	-0.022572	-0.0005643
840	-0.1201	98.74	-0.022669	-0.000566725
841	-0.11958	98.74	-0.022694	-0.00056735
842	-0.11983	98.74	-0.022694	-0.00056735
843	-0.11918	98.74	-0.022694	-0.00056735
844	-0.11928	98.74	-0.022694	-0.00056735
845	-0.1193	98.74	-0.022694	-0.00056735
846	-0.11927	98.7402	-0.022694	-0.00056735
847	-0.11886	98.7376	-0.022694	-0.00056735
848	-0.11851	98.7376	-0.022694	-0.00056735
849	-0.11886	98.7375	-0.022683	-0.000567075
850	-0.11863	98.736	-0.022449	-0.000561225
851	-0.11862	98.7351	-0.02161	-0.00054025
852	-0.11872	98.7352	-0.020826	-0.00052065
853	-0.11879	98.7352	-0.020638	-0.00051595
854	-0.11838	98.7352	-0.020631	-0.000515775
855	-0.11889	98.7352	-0.020649	-0.000516225
856	-0.11871	98.7352	-0.020808	-0.0005202
857	-0.11838	98.7352	-0.021126	-0.00052815
858	-0.11884	98.7352	-0.021297	-0.000532425
859	-0.1192	98.7351	-0.0213	-0.0005325
860	-0.11898	98.7334	-0.021138	-0.00052845
861	-0.11887	98.7327	-0.020821	-0.000520525
862	-0.11931	98.7327	-0.020652	-0.0005163
863	-0.11917	98.7327	-0.020612	-0.0005153
864	-0.11907	98.7327	-0.020448	-0.0005112
865	-0.11912	98.7327	-0.02013	-0.00050325
866	-0.1194	98.7327	-0.019963	-0.000499075
867	-0.1195	98.7327	-0.019903	-0.000497575
868	-0.11922	98.7327	-0.01957	-0.00048925
869	-0.11926	98.7327	-0.018936	-0.0004734
870	-0.11922	98.7327	-0.018605	-0.000465125
871	-0.11959	98.7328	-0.018502	-0.00046255
872	-0.11957	98.7332	-0.018159	-0.000453975
873	-0.11962	98.728	-0.017586	-0.00043965
874	-0.11964	98.7279	-0.017253	-0.000431325
875	-0.11999	98.7279	-0.017173	-0.000429325
876	-0.11985	98.7279	-0.017026	-0.00042565
877	-0.11999	98.7279	-0.016797	-0.000419925
878	-0.12013	98.7279	-0.016633	-0.000415825
879	-0.1204	98.7272	-0.016528	-0.0004132
880	-0.12036	98.7254	-0.016505	-0.000412625
881	-0.12024	98.7202	-0.016505	-0.000412625
882	-0.12058	98.7207	-0.016505	-0.000412625
883	-0.12074	98.7207	-0.016505	-0.000412625
884	-0.12081	98.7207	-0.016505	-0.000412625
885	-0.12094	98.7206	-0.016505	-0.000412625
886	-0.12132	98.7165	-0.016493	-0.000412325
887	-0.12121	98.7158	-0.016385	-0.000409625
888	-0.12137	98.7158	-0.016247	-0.000406175
889	-0.12153	98.7158	-0.016361	-0.000409025
890	-0.12197	98.7158	-0.016448	-0.0004112
891	-0.12198	98.7158	-0.016292	-0.0004073
892	-0.1218	98.7158	-0.016335	-0.000408375
893	-0.12243	98.7158	-0.016853	-0.000421325
894	-0.12235	98.7158	-0.017145	-0.000428625
895	-0.12236	98.7158	-0.017047	-0.000426175
896	-0.12271	98.7158	-0.016735	-0.000418375
897	-0.12235	98.7132	-0.016536	-0.0004134
898	-0.12207	98.7134	-0.016501	-0.000412525
899	-0.12194	98.7134	-0.016374	-0.00040935
900	-0.12179	98.7134	-0.015853	-0.000396325
901	-0.12258	98.7134	-0.015295	-0.000382375
902	-0.12176	98.7134	-0.015137	-0.000378425
903	-0.12172	98.7136	-0.015129	-0.000378225
904	-0.12161	98.711	-0.015129	-0.000378225
905	-0.12135	98.711	-0.015129	-0.000378225
906	-0.1218	98.711	-0.015129	-0.000378225
907	-0.12139	98.711	-0.015082	-0.00037705
908	-0.12166	98.711	-0.014724	-0.0003681
909	-0.12093	98.7083	-0.01409	-0.00035225
910	-0.1217	98.7086	-0.013787	-0.000344675
911	-0.12114	98.7086	-0.013766	-0.00034415
912	-0.12144	98.7086	-0.013963	-0.000349075
913	-0.12061	98.7086	-0.014554	-0.00036385
914	-0.12092	98.7086	-0.015031	-0.000375775
915	-0.12002	98.7086	-0.015115	-0.000377875
916	-0.12003	98.7086	-0.015134	-0.00037835
917	-0.12015	98.7086	-0.015412	-0.0003853
918	-0.11998	98.7086	-0.015733	-0.000393325
919	-0.11987	98.7086	-0.015744	-0.0003936
920	-0.12001	98.7086	-0.015479	-0.000386975
921	-0.11926	98.7075	-0.015206	-0.00038015
922	-0.11897	98.7062	-0.015133	-0.000378325
923	-0.1192	98.7062	-0.01518	-0.0003795
924	-0.11947	98.7062	-0.015549	-0.000388725
925	-0.1194	98.7062	-0.016181	-0.000404525
926	-0.11966	98.7062	-0.016475	-0.000411875
927	-0.11908	98.7035	-0.016505	-0.000412625
928	-0.11999	98.7038	-0.016502	-0.00041255
929	-0.11953	98.7038	-0.016432	-0.0004108
930	-0.11927	98.7038	-0.016164	-0.0004041
931	-0.11871	98.7038	-0.015892	-0.0003973
932	-0.11827	98.7038	-0.015826	-0.00039565
933	-0.11832	98.7038	-0.015962	-0.00039905
934	-0.11821	98.7038	-0.016498	-0.00041245
935	-0.11796	98.7038	-0.017042	-0.00042605
936	-0.11787	98.7038	-0.017186	-0.00042965
937	-0.11773	98.7038	-0.017192	-0.0004298
938	-0.11811	98.7038	-0.017192	-0.0004298
939	-0.11742	98.7014	-0.017193	-0.000429825
940	-0.11738	98.7014	-0.017192	-0.0004298
941	-0.11734	98.7014	-0.017138	-0.00042845
942	-0.11659	98.7014	-0.016759	-0.000418975
943	-0.11706	98.7014	-0.01613	-0.00040325
944	-0.11714	98.7014	-0.015845	-0.000396125
945	-0.11698	98.7014	-0.015817	-0.000395425
946	-0.1169	98.7014	-0.015817	-0.000395425
947	-0.11791	98.7016	-0.015816	-0.0003954
948	-0.11761	98.699	-0.015769	-0.000394225
949	-0.118	98.6989	-0.015517	-0.000387925
950	-0.11702	98.6989	-0.015001	-0.000375025
951	-0.11755	98.6989	-0.014223	-0.000355575
952	-0.11736	98.6989	-0.013493	-0.000337325
953	-0.11743	98.6989	-0.013294	-0.00033235
954	-0.11735	98.6989	-0.013772	-0.0003443
955	-0.11689	98.6989	-0.014146	-0.00035365
956	-0.1175	98.6989	-0.013724	-0.0003431
957	-0.11713	98.6989	-0.013187	-0.000329675
958	-0.11709	98.699	-0.013084	-0.0003271
959	-0.11777	98.6963	-0.013376	-0.0003344
960	-0.11707	98.6965	-0.013685	-0.000342125
961	-0.11722	98.6965	-0.013753	-0.000343825
962	-0.11673	98.6967	-0.013754	-0.00034385
963	-0.11723	98.6913	-0.013754	-0.00034385
964	-0.11628	98.6917	-0.013754	-0.00034385
965	-0.11624	98.6917	-0.013745	-0.000343625
966	-0.11583	98.6917	-0.013628	-0.0003407
967	-0.11572	98.6917	-0.013321	-0.000333025
968	-0.11516	98.6917	-0.013104	-0.0003276
969	-0.11435	98.6917	-0.013067	-0.000326675
970	-0.1142	98.6917	-0.013066	-0.00032665
971	-0.11401	98.6917	-0.013076	-0.0003269
972	-0.1141	98.6917	-0.013178	-0.00032945
973	-0.11376	98.6917	-0.013323	-0.000333075
974	-0.11334	98.6917	-0.013217	-0.000330425
975	-0.11329	98.6917	-0.013106	-0.00032765
976	-0.11339	98.6917	-0.013333	-0.000333325
977	-0.11268	98.6917	-0.013942	-0.00034855
978	-0.11238	98.6917	-0.014237	-0.000355925
979	-0.1132	98.6917	-0.013994	-0.00034985
980	-0.11275	98.6917	-0.013788	-0.0003447
981	-0.11168	98.6917	-0.013754	-0.00034385
982	-0.1112	98.6916	-0.013754	-0.00034385
983	-0.11071	98.6876	-0.013754	-0.00034385
984	-0.11029	98.6868	-0.013732	-0.0003433
985	-0.11003	98.6869	-0.013558	-0.00033895
986	-0.10968	98.6868	-0.01324	-0.000331
987	-0.10973	98.6826	-0.013084	-0.0003271
988	-0.10923	98.682	-0.013066	-0.00032665
989	-0.10885	98.6821	-0.013064	-0.0003266
990	-0.1084	98.6821	-0.012999	-0.000324975
991	-0.10836	98.6821	-0.012735	-0.000318375
992	-0.10829	98.6821	-0.012458	-0.00031145
993	-0.10693	98.6821	-0.012395	-0.000309875
994	-0.10682	98.6825	-0.012531	-0.000313275
995	-0.10628	98.6772	-0.012832	-0.0003208
996	-0.10535	98.6772	-0.012883	-0.000322075
997	-0.10453	98.6772	-0.012624	-0.0003156
998	-0.10451	98.6772	-0.012722	-0.00031805
999	-0.10441	98.6772	-0.013371	-0.000334275
1000	-0.10387	98.6772	-0.013979	-0.000349475
1001	-0.10378	98.6772	-0.014332	-0.0003583
1002	-0.1035	98.6772	-0.014442	-0.00036105
1003	-0.10254	98.6772	-0.014572	-0.0003643
1004	-0.10165	98.6745	-0.015025	-0.000375625
1005	-0.10089	98.6724	-0.015569	-0.000389225
1006	-0.10037	98.6724	-0.015791	-0.000394775
1007	-0.10027	98.6724	-0.015767	-0.000394175
1008	-0.099673	98.6724	-0.015527	-0.000388175
1009	-0.099712	98.6724	-0.015232	-0.0003808
1010	-0.099003	98.6724	-0.015135	-0.000378375
1011	-0.098986	98.6724	-0.015129	-0.000378225
1012	-0.098468	98.6724	-0.015129	-0.000378225
1013	-0.098238	98.6724	-0.015129	-0.000378225
1014	-0.09797	98.6724	-0.015129	-0.000378225
1015	-0.098138	98.6724	-0.015129	-0.000378225
1016	-0.097886	98.6724	-0.015098	-0.00037745
1017	-0.09763	98.6724	-0.014948	-0.0003737
1018	-0.096451	98.6724	-0.014883	-0.000372075
1019	-0.095778	98.6724	-0.015045	-0.000376125
1020	-0.095229	98.6724	-0.015134	-0.00037835
1021	-0.095849	98.6724	-0.015259	-0.000381475
1022	-0.095755	98.6742	-0.015566	-0.00038915
1023	-0.094794	98.6748	-0.01578	-0.0003945
1024	-0.094459	98.6712	-0.015817	-0.000395425
1025	-0.094133	98.67	-0.015817	-0.000395425
1026	-0.093841	98.67	-0.015817	-0.000395425
1027	-0.093488	98.67	-0.015797	-0.000394925
1028	-0.09115	98.6696	-0.015632	-0.0003908
1029	-0.090841	98.667	-0.015315	-0.000382875
1030	-0.089893	98.6676	-0.01516	-0.000379
1031	-0.089299	98.6676	-0.015224	-0.0003806
1032	-0.089198	98.6676	-0.015199	-0.000379975
1033	-0.089034	98.6676	-0.014772	-0.0003693
1034	-0.088776	98.6676	-0.01448	-0.000362
1035	-0.088041	98.6676	-0.014442	-0.00036105
1036	-0.087473	98.6676	-0.014442	-0.00036105
1037	-0.087728	98.6676	-0.014442	-0.00036105
1038	-0.08719	98.6676	-0.014479	-0.000361975
1039	-0.086436	98.6676	-0.014695	-0.000367375
1040	-0.086123	98.6676	-0.015003	-0.000375075
1041	-0.08586	98.6676	-0.01512	-0.000378
1042	-0.085771	98.6675	-0.015129	-0.000378225
1043	-0.084639	98.6649	-0.015129	-0.000378225
1044	-0.08445	98.6651	-0.015141	-0.000378525
1045	-0.084375	98.6651	-0.015274	-0.00038185
1046	-0.084363	98.6651	-0.015627	-0.000390675
1047	-0.08458	98.6598	-0.016111	-0.000402775
1048	-0.084174	98.6603	-0.016709	-0.000417725
1049	-0.083774	98.6603	-0.017115	-0.000427875
1050	-0.083584	98.6603	-0.017393	-0.000434825
1051	-0.083382	98.6603	-0.017976	-0.0004494
1052	-0.083684	98.6603	-0.018273	-0.000456825
1053	-0.082918	98.6603	-0.017916	-0.0004479
1054	-0.082559	98.6603	-0.017756	-0.0004439
1055	-0.082685	98.6601	-0.017866	-0.00044665
1056	-0.083055	98.6628	-0.017875	-0.000446875
1057	-0.082195	98.6627	-0.017597	-0.000439925
1058	-0.082733	98.6627	-0.017273	-0.000431825
1059	-0.082936	98.6627	-0.017195	-0.000429875
1060	-0.083038	98.6627	-0.017193	-0.000429825
1061	-0.082192	98.6627	-0.017193	-0.000429825
1062	-0.082703	98.6627	-0.017192	-0.0004298
1063	-0.08204	98.6627	-0.017138	-0.00042845
1064	-0.081486	98.6628	-0.016759	-0.000418975
1065	-0.082151	98.6601	-0.01613	-0.00040325
1066	-0.081448	98.6603	-0.015845	-0.000396125
1067	-0.081097	98.6603	-0.015817	-0.000395425
1068	-0.080963	98.6604	-0.015848	-0.0003962
1069	-0.079619	98.6551	-0.016144	-0.0004036
1070	-0.078339	98.6554	-0.016776	-0.0004194
1071	-0.078829	98.6531	-0.017142	-0.00042855
1072	-0.079108	98.6531	-0.017185	-0.000429625
1073	-0.079033	98.653	-0.017033	-0.000425825
1074	-0.077781	98.6506	-0.016479	-0.000411975
1075	-0.077369	98.648	-0.015952	-0.0003988
1076	-0.077678	98.6483	-0.015822	-0.00039555
1077	-0.077107	98.6483	-0.015817	-0.000395425
1078	-0.076583	98.6483	-0.015817	-0.000395425
1079	-0.076399	98.6483	-0.015817	-0.000395425
1080	-0.076212	98.6483	-0.015817	-0.000395425
1081	-0.076227	98.6483	-0.015817	-0.000395425
1082	-0.07643	98.6483	-0.015817	-0.000395425
1083	-0.076485	98.6483	-0.015817	-0.000395425
1084	-0.075574	98.6483	-0.015817	-0.000395425
1085	-0.074773	98.6483	-0.015817	-0.000395425
1086	-0.075191	98.6483	-0.015817	-0.000395425
1087	-0.074078	98.6483	-0.015817	-0.000395425
1088	-0.074388	98.6478	-0.015817	-0.000395425
1089	-0.074207	98.6459	-0.015817	-0.000395425
1090	-0.074649	98.6458	-0.015822	-0.00039555
1091	-0.0751	98.6458	-0.015909	-0.000397725
1092	-0.074498	98.6432	-0.016187	-0.000404675
1093	-0.074311	98.6434	-0.016262	-0.00040655
1094	-0.074944	98.6434	-0.015781	-0.000394525
1095	-0.074273	98.6434	-0.015623	-0.000390575
1096	-0.073968	98.6434	-0.016151	-0.000403775
1097	-0.072975	98.6434	-0.016484	-0.0004121
1098	-0.073345	98.6434	-0.016477	-0.000411925
1099	-0.072531	98.6434	-0.016159	-0.000403975
1100	-0.071779	98.6434	-0.015869	-0.000396725

## Sheet: FS-Air-20
	Atmosphere: Air			Material: Foundry sand
	Heating rate: 20 ℃/min
Temp./℃	DSC/(mW/mg)	Mass/%	DTG/(%/min)
40	0.014807	99.9971	-0.0039933
41	0.017404	99.9917	-0.004806
42	0.02026	100.002	-0.0033738
43	0.022698	100.011	-0.0031605
44	0.024929	100.005	-0.0035199
45	0.027581	100.005	-0.0042251
46	0.029334	99.9973	-0.0035164
47	0.031694	99.9978	-0.0043803
48	0.033762	99.9931	-0.0036944
49	0.035712	99.991	-0.0039947
50	0.037509	99.9975	-0.0042506
51	0.03958	99.994	-0.0057387
52	0.041256	99.9949	-0.0060956
53	0.043171	99.9928	-0.005685
54	0.044782	99.9904	-0.0054517
55	0.0462	99.9903	-0.0053585
56	0.047734	99.9889	-0.0058071
57	0.049232	99.9898	-0.0066338
58	0.05112	99.9875	-0.0078306
59	0.052702	99.9874	-0.0087616
60	0.05403	99.987	-0.0083762
61	0.055323	99.9869	-0.0077495
62	0.05651	99.9904	-0.0077936
63	0.058027	99.9904	-0.0063705
64	0.059042	99.9873	-0.0058851
65	0.060353	99.9873	-0.0065608
66	0.061981	99.9901	-0.0072062
67	0.06314	99.9898	-0.0081114
68	0.064362	99.9891	-0.0091363
69	0.065732	99.9895	-0.010341
70	0.066914	99.9898	-0.010511
71	0.068206	99.9847	-0.010445
72	0.069303	99.9847	-0.010621
73	0.070386	99.9832	-0.010616
74	0.071335	99.9824	-0.010255
75	0.072251	99.9873	-0.010447
76	0.073475	99.9858	-0.01039
77	0.074158	99.9823	-0.010676
78	0.075258	99.9796	-0.012123
79	0.076157	99.9792	-0.012347
80	0.077021	99.9822	-0.013859
81	0.077786	99.9822	-0.014382
82	0.078512	99.9799	-0.014273
83	0.079202	99.982	-0.01395
84	0.079921	99.9848	-0.013997
85	0.080697	99.9791	-0.014216
86	0.081484	99.982	-0.013416
87	0.082175	99.9797	-0.013208
88	0.083005	99.9824	-0.013556
89	0.083618	99.98	-0.013688
90	0.084352	99.9773	-0.013971
91	0.085001	99.9719	-0.014278
92	0.085437	99.9689	-0.014708
93	0.086023	99.9696	-0.01525
94	0.086641	99.9668	-0.015232
95	0.086457	99.9719	-0.015787
96	0.087256	99.9696	-0.016119
97	0.087923	99.9692	-0.016344
98	0.088754	99.9664	-0.016544
99	0.089128	99.9693	-0.016447
100	0.089147	99.9683	-0.017036
101	0.089136	99.9684	-0.017358
102	0.089499	99.9679	-0.017906
103	0.089887	99.9652	-0.017901
104	0.090587	99.9606	-0.017806
105	0.091112	99.9594	-0.017641
106	0.091564	99.9594	-0.018212
107	0.092152	99.9594	-0.018785
108	0.092734	99.9594	-0.01954
109	0.093424	99.9541	-0.019769
110	0.093235	99.9593	-0.020168
111	0.093784	99.9594	-0.020464
112	0.094206	99.9593	-0.0207
113	0.095156	99.9543	-0.020893
114	0.095447	99.9538	-0.021477
115	0.096013	99.9544	-0.021782
116	0.096161	99.9516	-0.022238
117	0.096142	99.952	-0.022796
118	0.096457	99.9492	-0.022704
119	0.096841	99.9492	-0.023788
120	0.097544	99.9492	-0.024411
121	0.097379	99.9467	-0.024725
122	0.097938	99.9439	-0.024696
123	0.098264	99.9441	-0.024579
124	0.098148	99.9442	-0.02597
125	0.098655	99.9391	-0.026093
126	0.099054	99.939	-0.026914
127	0.099679	99.9421	-0.026295
128	0.10005	99.9365	-0.026304
129	0.10041	99.939	-0.027375
130	0.10077	99.938	-0.027795
131	0.10077	99.934	-0.028193
132	0.10073	99.934	-0.02817
133	0.10081	99.934	-0.028974
134	0.10099	99.934	-0.02879
135	0.10101	99.9325	-0.029795
136	0.10089	99.9289	-0.029675
137	0.1008	99.9313	-0.030214
138	0.10087	99.9315	-0.030678
139	0.10095	99.9265	-0.031051
140	0.10121	99.9236	-0.031191
141	0.10147	99.9238	-0.030933
142	0.10171	99.9213	-0.030801
143	0.10255	99.9188	-0.030666
144	0.10285	99.9189	-0.030414
145	0.10354	99.9162	-0.030418
146	0.10383	99.9165	-0.030765
147	0.10385	99.9137	-0.031552
148	0.10417	99.9109	-0.031453
149	0.10419	99.9115	-0.031399
150	0.10465	99.9061	-0.031641
151	0.10513	99.9061	-0.03276
152	0.10546	99.9059	-0.033035
153	0.10512	99.901	-0.033369
154	0.10541	99.9009	-0.033681
155	0.1053	99.8959	-0.033661
156	0.10571	99.8959	-0.033795
157	0.10498	99.8959	-0.033427
158	0.10456	99.8959	-0.033773
159	0.10421	99.8909	-0.033952
160	0.10385	99.8908	-0.034825
161	0.10353	99.8884	-0.035675
162	0.10356	99.8883	-0.035569
163	0.10382	99.8858	-0.03623
164	0.10374	99.883	-0.03675
165	0.1033	99.8832	-0.03686
166	0.10295	99.8807	-0.036431
167	0.103	99.8809	-0.036385
168	0.10237	99.8782	-0.037229
169	0.10269	99.8756	-0.037586
170	0.10278	99.8755	-0.03728
171	0.10189	99.8705	-0.037265
172	0.10177	99.8706	-0.037424
173	0.10269	99.8615	-0.037771
174	0.10263	99.8606	-0.037958
175	0.10235	99.8578	-0.038507
176	0.10253	99.8578	-0.038841
177	0.10237	99.855	-0.038754
178	0.10206	99.8503	-0.038515
179	0.1021	99.8502	-0.038268
180	0.10176	99.8477	-0.039168
181	0.10161	99.8477	-0.039844
182	0.10107	99.8479	-0.039307
183	0.10118	99.8395	-0.039623
184	0.10119	99.84	-0.039436
185	0.10115	99.8376	-0.038787
186	0.10086	99.8375	-0.038844
187	0.10088	99.8351	-0.039612
188	0.10066	99.835	-0.040137
189	0.10038	99.8352	-0.040066
190	0.099966	99.8299	-0.039796
191	0.10003	99.8301	-0.040347
192	0.099501	99.8247	-0.040707
193	0.098974	99.8247	-0.040369
194	0.098423	99.8224	-0.040464
195	0.097777	99.8197	-0.040801
196	0.09747	99.8183	-0.040808
197	0.097359	99.8172	-0.041007
198	0.096832	99.8147	-0.041255
199	0.096179	99.8147	-0.041345
200	0.095062	99.8147	-0.041607
201	0.094945	99.8097	-0.04182
202	0.094761	99.8096	-0.041696
203	0.094036	99.8096	-0.041341
204	0.09395	99.8096	-0.041049
205	0.093688	99.8044	-0.041504
206	0.093726	99.8018	-0.042215
207	0.093612	99.8008	-0.041975
208	0.0932	99.7969	-0.042076
209	0.092087	99.7969	-0.042803
210	0.090537	99.7965	-0.04325
211	0.090122	99.7918	-0.043227
212	0.089325	99.7905	-0.043234
213	0.088695	99.7867	-0.043644
214	0.088597	99.7866	-0.043445
215	0.088191	99.7816	-0.043365
216	0.087441	99.7767	-0.043735
217	0.086964	99.7741	-0.043882
218	0.086753	99.774	-0.044225
219	0.086191	99.7715	-0.043924
220	0.085644	99.7716	-0.04402
221	0.085021	99.7689	-0.044289
222	0.084837	99.769	-0.044164
223	0.083673	99.769	-0.044318
224	0.0832	99.7613	-0.045017
225	0.082631	99.7613	-0.045169
226	0.081973	99.7593	-0.044816
227	0.081501	99.7588	-0.044857
228	0.080905	99.7563	-0.044497
229	0.08035	99.7548	-0.044006
230	0.080195	99.754	-0.043884
231	0.079589	99.7461	-0.044205
232	0.079516	99.7461	-0.044396
233	0.078946	99.7461	-0.043738
234	0.078606	99.7433	-0.043252
235	0.077921	99.7439	-0.043321
236	0.076198	99.7359	-0.04346
237	0.075778	99.736	-0.043669
238	0.075212	99.736	-0.043005
239	0.074053	99.736	-0.042472
240	0.073781	99.736	-0.042455
241	0.073261	99.736	-0.042317
242	0.072908	99.734	-0.04325
243	0.072643	99.7309	-0.04334
244	0.072628	99.7283	-0.043632
245	0.072808	99.7283	-0.043051
246	0.072583	99.7233	-0.043583
247	0.07151	99.7232	-0.044302
248	0.069585	99.7232	-0.044239
249	0.068261	99.7217	-0.043892
250	0.068218	99.7157	-0.043554
251	0.067654	99.7135	-0.044072
252	0.066803	99.713	-0.043777
253	0.06608	99.708	-0.043789
254	0.065641	99.7083	-0.044204
255	0.06467	99.7056	-0.044757
256	0.064153	99.7031	-0.045097
257	0.063456	99.7004	-0.045626
258	0.062245	99.7004	-0.045871
259	0.060705	99.7007	-0.046199
260	0.060015	99.6977	-0.046287
261	0.059545	99.6903	-0.045937
262	0.058439	99.6902	-0.046378
263	0.056756	99.6877	-0.04586
264	0.05591	99.6852	-0.045711
265	0.054391	99.6753	-0.045723
266	0.053512	99.675	-0.045353
267	0.05239	99.675	-0.045308
268	0.051583	99.675	-0.044929
269	0.050298	99.67	-0.045511
270	0.049373	99.6699	-0.045427
271	0.048303	99.6649	-0.045215
272	0.04713	99.6648	-0.045127
273	0.045976	99.6593	-0.045212
274	0.046007	99.6598	-0.045774
275	0.045462	99.6598	-0.046286
276	0.044461	99.6548	-0.046864
277	0.043454	99.6547	-0.047324
278	0.042402	99.654	-0.047922
279	0.041573	99.6474	-0.047553
280	0.040995	99.6446	-0.04761
281	0.03997	99.6441	-0.048163
282	0.038907	99.642	-0.048866
283	0.038225	99.6384	-0.049049
284	0.037632	99.637	-0.049874
285	0.04053	99.6344	-0.049944
286	0.039611	99.6316	-0.049939
287	0.038349	99.6319	-0.050113
288	0.036895	99.6293	-0.050498
289	0.035392	99.6293	-0.051143
290	0.034657	99.6295	-0.051932
291	0.033028	99.6267	-0.051634
292	0.032081	99.6242	-0.052122
293	0.030169	99.6242	-0.052781
294	0.028804	99.6242	-0.05435
295	0.027044	99.6217	-0.055016
296	0.026039	99.6217	-0.05547
297	0.02455	99.6189	-0.055453
298	0.023004	99.6141	-0.055004
299	0.021379	99.6113	-0.055322
300	0.020356	99.6115	-0.055796
301	0.018195	99.6091	-0.055477
302	0.017	99.6044	-0.055453
303	0.015927	99.5988	-0.055815
304	0.013964	99.5988	-0.05605
305	0.012896	99.5989	-0.056135
306	0.011768	99.5938	-0.057056
307	0.010812	99.5938	-0.057885
308	0.0095462	99.5937	-0.058161
309	0.008129	99.5887	-0.058895
310	0.0067087	99.5892	-0.059343
311	0.0053099	99.5836	-0.059733
312	0.0042264	99.576	-0.059894
313	0.0028318	99.5759	-0.060346
314	0.0011986	99.5734	-0.060968
315	-7.4976e-05	99.5737	-0.060852
316	-0.001417	99.5708	-0.060448
317	-0.0026416	99.5657	-0.060633
318	-0.0040963	99.5633	-0.061182
319	-0.0055051	99.5633	-0.061528
320	-0.0067396	99.5633	-0.061619
321	-0.007682	99.5608	-0.061726
322	-0.0087359	99.5609	-0.062676
323	-0.010509	99.5582	-0.063614
324	-0.01195	99.5527	-0.063651
325	-0.013915	99.5527	-0.064524
326	-0.015065	99.551	-0.065307
327	-0.016522	99.5455	-0.065586
328	-0.018131	99.543	-0.065775
329	-0.019516	99.539	-0.066091
330	-0.020997	99.5354	-0.067702
331	-0.0222	99.5304	-0.06844
332	-0.023207	99.5277	-0.069353
333	-0.024197	99.5242	-0.069796
334	-0.02533	99.5202	-0.07019
335	-0.026756	99.5174	-0.070045
336	-0.028225	99.515	-0.070499
337	-0.02969	99.5074	-0.070804
338	-0.030876	99.5075	-0.071087
339	-0.032066	99.5	-0.071705
340	-0.033113	99.4998	-0.072858
341	-0.034128	99.492	-0.073416
342	-0.035592	99.4897	-0.074083
343	-0.036762	99.4871	-0.075253
344	-0.03795	99.4858	-0.076368
345	-0.039488	99.4767	-0.077413
346	-0.04069	99.4745	-0.078208
347	-0.041677	99.4693	-0.078749
348	-0.042698	99.4673	-0.07953
349	-0.043991	99.4565	-0.081254
350	-0.045159	99.454	-0.082291
351	-0.046127	99.4513	-0.083412
352	-0.047239	99.4516	-0.083522
353	-0.047856	99.4489	-0.083898
354	-0.04882	99.4434	-0.08496
355	-0.049565	99.4436	-0.085871
356	-0.050753	99.4414	-0.086592
357	-0.051783	99.4387	-0.087176
358	-0.05271	99.4383	-0.088155
359	-0.053426	99.4363	-0.089744
360	-0.054027	99.4307	-0.090757
361	-0.054741	99.4238	-0.091593
362	-0.055402	99.416	-0.092717
363	-0.05616	99.411	-0.093716
364	-0.05692	99.4059	-0.094288
365	-0.057623	99.4008	-0.094997
366	-0.058606	99.3957	-0.095723
367	-0.059214	99.393	-0.096953
368	-0.059857	99.3915	-0.098492
369	-0.06071	99.3881	-0.099699
370	-0.061808	99.3839	-0.1008
371	-0.062583	99.3831	-0.10242
372	-0.06319	99.3782	-0.10329
373	-0.064256	99.373	-0.10453
374	-0.065252	99.3689	-0.10625
375	-0.066451	99.3603	-0.10832
376	-0.067396	99.3597	-0.10966
377	-0.068378	99.3525	-0.11089
378	-0.069542	99.3474	-0.11171
379	-0.070202	99.345	-0.11222
380	-0.071167	99.3372	-0.11333
381	-0.072215	99.3295	-0.11379
382	-0.073388	99.3302	-0.11496
383	-0.074307	99.3246	-0.11696
384	-0.075097	99.3196	-0.11773
385	-0.076063	99.3097	-0.11888
386	-0.077069	99.3019	-0.11988
387	-0.078245	99.2992	-0.12168
388	-0.079354	99.2917	-0.12248
389	-0.080377	99.2893	-0.1239
390	-0.08136	99.2837	-0.12474
391	-0.082346	99.2816	-0.12539
392	-0.083783	99.2765	-0.12625
393	-0.084981	99.2714	-0.12677
394	-0.086344	99.2608	-0.1277
395	-0.087422	99.2603	-0.12836
396	-0.08888	99.2535	-0.12989
397	-0.090047	99.2437	-0.1316
398	-0.091238	99.2411	-0.13271
399	-0.092681	99.2349	-0.13344
400	-0.094279	99.2257	-0.13448
401	-0.095476	99.2234	-0.1357
402	-0.096967	99.2177	-0.13678
403	-0.098584	99.2074	-0.137
404	-0.099973	99.2028	-0.1382
405	-0.10174	99.1949	-0.13939
406	-0.1031	99.1912	-0.14112
407	-0.10458	99.1846	-0.1427
408	-0.10617	99.1774	-0.14406
409	-0.10762	99.1723	-0.14618
410	-0.10969	99.1646	-0.14792
411	-0.11106	99.1551	-0.14943
412	-0.11285	99.1466	-0.15158
413	-0.11435	99.1392	-0.15338
414	-0.11589	99.1343	-0.15405
415	-0.11726	99.124	-0.15479
416	-0.11919	99.1192	-0.15635
417	-0.12066	99.1114	-0.15758
418	-0.12227	99.1049	-0.15847
419	-0.12396	99.0984	-0.1594
420	-0.1256	99.091	-0.16044
421	-0.12718	99.0784	-0.16177
422	-0.12853	99.0689	-0.16276
423	-0.13009	99.0634	-0.16474
424	-0.13151	99.0563	-0.16582
425	-0.13283	99.0426	-0.167
426	-0.13429	99.0352	-0.16765
427	-0.13561	99.0276	-0.16817
428	-0.13671	99.0174	-0.16858
429	-0.13778	99.0048	-0.16959
430	-0.13924	98.9994	-0.17068
431	-0.14044	98.9893	-0.17139
432	-0.14138	98.9845	-0.17267
433	-0.14284	98.9774	-0.1738
434	-0.14372	98.9689	-0.17426
435	-0.14471	98.9641	-0.17505
436	-0.14584	98.9514	-0.17653
437	-0.14694	98.938	-0.17792
438	-0.1481	98.9296	-0.17797
439	-0.14907	98.9228	-0.17847
440	-0.14979	98.9108	-0.17895
441	-0.1511	98.9008	-0.17989
442	-0.1521	98.8899	-0.18033
443	-0.15316	98.8821	-0.1815
444	-0.15413	98.8752	-0.18243
445	-0.15498	98.8651	-0.18363
446	-0.15587	98.8579	-0.18449
447	-0.15665	98.8489	-0.18502
448	-0.15758	98.8418	-0.18565
449	-0.15828	98.831	-0.18668
450	-0.15946	98.8219	-0.18696
451	-0.16003	98.8096	-0.18668
452	-0.1611	98.7993	-0.18685
453	-0.16203	98.7912	-0.18728
454	-0.16279	98.7814	-0.18761
455	-0.16357	98.7709	-0.18803
456	-0.16451	98.761	-0.18819
457	-0.16516	98.7518	-0.18755
458	-0.16606	98.7434	-0.18778
459	-0.16679	98.7332	-0.18874
460	-0.16766	98.7237	-0.18896
461	-0.16782	98.7127	-0.18864
462	-0.16855	98.6976	-0.18862
463	-0.16938	98.6903	-0.18851
464	-0.16998	98.6777	-0.1876
465	-0.17049	98.6676	-0.18689
466	-0.17107	98.6545	-0.18636
467	-0.17141	98.6441	-0.18631
468	-0.17156	98.634	-0.18563
469	-0.17218	98.6198	-0.18495
470	-0.17228	98.6071	-0.18431
471	-0.1726	98.5953	-0.18392
472	-0.17282	98.5877	-0.18397
473	-0.17299	98.5752	-0.18303
474	-0.17291	98.5679	-0.18121
475	-0.17269	98.5606	-0.18035
476	-0.17239	98.5446	-0.17953
477	-0.17254	98.5376	-0.17883
478	-0.17206	98.5306	-0.1775
479	-0.17191	98.5198	-0.17675
480	-0.17171	98.5144	-0.17681
481	-0.17109	98.5047	-0.17594
482	-0.17025	98.492	-0.17481
483	-0.16939	98.4824	-0.17418
484	-0.16882	98.4747	-0.1734
485	-0.16761	98.4634	-0.1731
486	-0.1669	98.453	-0.17254
487	-0.16544	98.4441	-0.17131
488	-0.16427	98.4359	-0.17073
489	-0.16302	98.4207	-0.16888
490	-0.16157	98.4105	-0.1673
491	-0.15996	98.403	-0.16632
492	-0.15827	98.3919	-0.16499
493	-0.15642	98.3842	-0.16333
494	-0.15431	98.3757	-0.16202
495	-0.15232	98.3668	-0.16061
496	-0.15013	98.3564	-0.15989
497	-0.14849	98.347	-0.15878
498	-0.14583	98.337	-0.15765
499	-0.14313	98.3301	-0.15722
500	-0.14117	98.3198	-0.15612
501	-0.13855	98.306	-0.15501
502	-0.13608	98.2987	-0.15366
503	-0.1335	98.2927	-0.15162
504	-0.13049	98.2862	-0.15032
505	-0.12771	98.2804	-0.14902
506	-0.12543	98.2706	-0.14754
507	-0.12277	98.2608	-0.14552
508	-0.12028	98.2558	-0.1445
509	-0.11701	98.2485	-0.14333
510	-0.11443	98.2401	-0.14141
511	-0.11148	98.2298	-0.13969
512	-0.10893	98.2253	-0.13791
513	-0.10588	98.2178	-0.13624
514	-0.1029	98.2126	-0.1343
515	-0.10017	98.2069	-0.13209
516	-0.097272	98.2021	-0.13044
517	-0.094552	98.1974	-0.12871
518	-0.091432	98.1897	-0.1268
519	-0.089257	98.1846	-0.1252
520	-0.086279	98.1795	-0.12322
521	-0.083577	98.1772	-0.12115
522	-0.080902	98.1725	-0.1185
523	-0.078013	98.1665	-0.11657
524	-0.075564	98.1645	-0.11541
525	-0.073303	98.1567	-0.11372
526	-0.070925	98.1572	-0.11251
527	-0.068519	98.1488	-0.11094
528	-0.065897	98.1468	-0.1087
529	-0.063534	98.1412	-0.1073
530	-0.061357	98.1384	-0.10598
531	-0.059088	98.1339	-0.10492
532	-0.057573	98.1237	-0.10446
533	-0.054934	98.1186	-0.10333
534	-0.052816	98.1116	-0.10188
535	-0.050774	98.1087	-0.099996
536	-0.048478	98.1065	-0.098596
537	-0.046526	98.0992	-0.096441
538	-0.044925	98.0928	-0.094266
539	-0.042628	98.0933	-0.092724
540	-0.041053	98.0883	-0.09115
541	-0.038884	98.0884	-0.088873
542	-0.037384	98.0844	-0.087257
543	-0.03575	98.0801	-0.08586
544	-0.033643	98.0781	-0.084186
545	-0.031739	98.0729	-0.083129
546	-0.030351	98.0704	-0.081588
547	-0.028926	98.0678	-0.080225
548	-0.026966	98.0627	-0.078268
549	-0.02558	98.0607	-0.076637
550	-0.023922	98.0587	-0.074604
551	-0.022445	98.0519	-0.072771
552	-0.020864	98.0501	-0.071035
553	-0.018834	98.0478	-0.068885
554	-0.0173	98.0425	-0.067415
555	-0.015728	98.0426	-0.066205
556	-0.013895	98.0402	-0.065154
557	-0.012337	98.0349	-0.063942
558	-0.010896	98.0323	-0.062698
559	-0.0092339	98.0323	-0.061808
560	-0.0074575	98.0297	-0.060591
561	-0.0057138	98.0247	-0.059599
562	-0.0042694	98.0247	-0.05821
563	-0.0017864	98.0247	-0.05627
564	-0.00019288	98.0228	-0.05491
565	0.0017925	98.0224	-0.053641
566	0.0041438	98.0195	-0.052644
567	0.0066098	98.017	-0.05184
568	0.010057	98.0143	-0.050919
569	0.013234	98.0144	-0.050341
570	0.018715	98.0094	-0.049242
571	0.030493	98.0069	-0.048465
572	0.057227	98.0069	-0.048088
573	0.073857	98.0044	-0.047437
574	0.069254	98.0044	-0.046786
575	0.058591	98.0044	-0.045842
576	0.048167	97.9993	-0.044618
577	0.039082	97.9992	-0.044186
578	0.032243	97.9942	-0.043723
579	0.026454	97.9942	-0.042761
580	0.02161	97.9942	-0.042032
581	0.017854	97.9892	-0.041685
582	0.014386	97.9892	-0.041911
583	0.012494	97.9842	-0.041221
584	0.010477	97.9791	-0.039644
585	0.0085391	97.977	-0.038573
586	0.0070846	97.9739	-0.037419
587	0.0058219	97.974	-0.036512
588	0.0051841	97.9714	-0.035806
589	0.0045695	97.9714	-0.035702
590	0.0044927	97.9714	-0.034937
591	0.0041153	97.9688	-0.034626
592	0.0038498	97.9688	-0.033859
593	0.0042116	97.9688	-0.033536
594	0.0044245	97.9635	-0.032639
595	0.0044965	97.9637	-0.031978
596	0.0050519	97.9623	-0.031369
597	0.0052275	97.9587	-0.030693
598	0.0061907	97.9589	-0.030271
599	0.0065128	97.9561	-0.029615
600	0.0069169	97.9561	-0.028863
601	0.0074672	97.9561	-0.028424
602	0.00849	97.9561	-0.027641
603	0.0089	97.9561	-0.026795
604	0.0097733	97.9561	-0.027227
605	0.010778	97.9534	-0.026366
606	0.011535	97.9536	-0.025837
607	0.011704	97.9536	-0.025574
608	0.012942	97.9511	-0.024835
609	0.013665	97.951	-0.02427
610	0.01463	97.9486	-0.02404
611	0.015434	97.946	-0.024604
612	0.016017	97.9436	-0.023694
613	0.017203	97.9434	-0.023353
614	0.017882	97.9434	-0.023353
615	0.018778	97.9434	-0.023327
616	0.019934	97.9434	-0.022948
617	0.020931	97.9434	-0.022542
618	0.021772	97.9418	-0.022146
619	0.02193	97.9409	-0.021686
620	0.023025	97.9408	-0.020935
621	0.024049	97.9383	-0.020408
622	0.024848	97.9383	-0.019242
623	0.025677	97.9327	-0.018886
624	0.026834	97.9333	-0.018771
625	0.027625	97.9333	-0.018406
626	0.028521	97.9333	-0.018376
627	0.029384	97.9333	-0.017814
628	0.030333	97.9326	-0.016828
629	0.031678	97.9307	-0.015846
630	0.032645	97.9307	-0.015405
631	0.033899	97.9307	-0.015402
632	0.034753	97.9308	-0.015057
633	0.035687	97.926	-0.014425
634	0.036768	97.9206	-0.014072
635	0.037494	97.9206	-0.013278
636	0.038088	97.9206	-0.013301
637	0.039296	97.9206	-0.012576
638	0.040369	97.9206	-0.012411
639	0.041335	97.9206	-0.012083
640	0.042313	97.9208	-0.011925
641	0.043021	97.9155	-0.011865
642	0.044135	97.9155	-0.010965
643	0.044951	97.9155	-0.010588
644	0.046003	97.9155	-0.010917
645	0.046082	97.9155	-0.010658
646	0.046994	97.9155	-0.0099665
647	0.04814	97.9155	-0.0098497
648	0.048863	97.9155	-0.0090914
649	0.050229	97.9155	-0.008919
650	0.051135	97.9155	-0.0081335
651	0.051768	97.9155	-0.0074623
652	0.052983	97.9155	-0.0074529
653	0.053218	97.9155	-0.0075675
654	0.054524	97.9155	-0.0079296
655	0.054689	97.9099	-0.0079498
656	0.055796	97.9104	-0.0078424
657	0.056669	97.9104	-0.0074749
658	0.056957	97.9104	-0.0074525
659	0.057716	97.9104	-0.007268
660	0.058392	97.9104	-0.0069177
661	0.059333	97.9104	-0.0064785
662	0.059521	97.9048	-0.0060271
663	0.060715	97.9053	-0.0058655
664	0.060811	97.9053	-0.0054915
665	0.06135	97.9053	-0.0055065
666	0.06192	97.9053	-0.0058936
667	0.06192	97.9053	-0.0059624
668	0.062664	97.9053	-0.0059624
669	0.06314	97.9053	-0.0058732
670	0.062745	97.9053	-0.0054947
671	0.063475	97.9078	-0.0054533
672	0.063394	97.9079	-0.0051145
673	0.064144	97.9106	-0.0049683
674	0.063907	97.9104	-0.0046445
675	0.064012	97.9104	-0.003994
676	0.064466	97.9104	-0.0036568
677	0.06458	97.9104	-0.0030123
678	0.064986	97.9104	-0.0033239
679	0.065142	97.9104	-0.0032419
680	0.065116	97.9155	-0.0025278
681	0.065852	97.9155	-0.0024843
682	0.066048	97.9155	-0.0024822
683	0.066422	97.9155	-0.0022328
684	0.066618	97.9155	-0.0014323
685	0.06681	97.9155	-0.00016976
686	0.067543	97.9155	5.9158e-09
687	0.067483	97.9104	-7.6321e-11
688	0.06798	97.9104	1.8604e-06
689	0.068144	97.9104	0.00024117
690	0.068379	97.9104	0.00049438
691	0.068837	97.9104	0.00057234
692	0.06904	97.9104	0.00095767
693	0.069106	97.9152	0.00099188
694	0.069829	97.9155	0.00075175
695	0.06994	97.913	0.00049946
696	0.070199	97.913	0.0006443
697	0.070456	97.913	0.0011299
698	0.071118	97.913	0.0015551
699	0.072108	97.913	0.001952
700	0.072134	97.913	0.0019875
701	0.072821	97.913	0.0019875
702	0.072839	97.918	0.0019875
703	0.072935	97.918	0.0019875
704	0.073107	97.918	0.0019875
705	0.073712	97.9155	0.0019245
706	0.073432	97.9155	0.001653
707	0.073905	97.9155	0.0019788
708	0.073854	97.9155	0.0014767
709	0.074261	97.9155	0.00099729
710	0.074853	97.9155	0.00099371
711	0.074652	97.9155	0.00098829
712	0.074882	97.9155	0.00047332
713	0.075408	97.9155	0.00053444
714	0.07555	97.9155	0.00099085
715	0.076131	97.9155	0.00099371
716	0.076361	97.9155	0.00099371
717	0.076755	97.913	0.00099371
718	0.076761	97.913	0.00099371
719	0.076981	97.913	0.00099371
720	0.077226	97.913	0.00099372
721	0.077503	97.913	0.00097759
722	0.077811	97.913	0.0006213
723	0.078015	97.913	0.00059864
724	0.078105	97.913	0.00068573
725	0.078283	97.913	0.00049778
726	0.078765	97.913	0.00028252
727	0.078535	97.9125	-0.00045369
728	0.07841	97.918	-0.00049686
729	0.078717	97.9152	-0.00049682
730	0.07879	97.9153	-0.00071636
731	0.078771	97.918	-0.001449
732	0.079066	97.918	-0.0014906
733	0.079231	97.918	-0.0014906
734	0.079402	97.9191	-0.0014906
735	0.079654	97.9206	-0.0014917
736	0.079693	97.9206	-0.0018796
737	0.079575	97.9206	-0.0024366
738	0.079681	97.9206	-0.0017275
739	0.08015	97.9206	-0.0014906
740	0.079982	97.9217	-0.0014906
741	0.08045	97.9231	-0.0014906
742	0.080328	97.9231	-0.0014726
743	0.080932	97.9206	-0.0011217
744	0.080987	97.9206	-0.0015775
745	0.081529	97.9195	-0.001935
746	0.081754	97.918	-0.0015272
747	0.082219	97.9178	-0.0011104
748	0.082093	97.9203	-0.00088156
749	0.082076	97.9232	-0.00051716
750	0.082352	97.9257	-0.00049687
751	0.082942	97.9257	-0.00049683
752	0.082808	97.9257	-0.00072453
753	0.082997	97.9257	-0.0014511
754	0.082964	97.9257	-0.0014378
755	0.082854	97.9257	-0.00099361
756	0.082853	97.9257	-0.0005503
757	0.083183	97.9207	-0.00049687
758	0.083385	97.9206	-0.00049686
759	0.083104	97.9182	-0.00049686
760	0.083347	97.9155	-0.00049686
761	0.083451	97.9155	-0.00049686
762	0.083586	97.9155	-0.00049686
763	0.083459	97.9133	-0.00049686
764	0.083842	97.9104	-0.00050622
765	0.084076	97.9104	-0.0010777
766	0.084301	97.9104	-0.001489
767	0.084331	97.9104	-0.0014721
768	0.084794	97.9104	-0.0011124
769	0.084866	97.9104	-0.0012137
770	0.085199	97.9104	-0.0019458
771	0.085802	97.9104	-0.0019875
772	0.086217	97.9104	-0.0019875
773	0.086262	97.9104	-0.0019875
774	0.08664	97.9105	-0.0018729
775	0.08701	97.913	-0.0015095
776	0.087455	97.913	-0.0014906
777	0.087599	97.9128	-0.0014906
778	0.087695	97.9078	-0.0017319
779	0.088011	97.9079	-0.0024436
780	0.08821	97.9079	-0.0021772
781	0.088797	97.9079	-0.0021128
782	0.088446	97.9079	-0.0024682
783	0.088766	97.9079	-0.0024843
784	0.088921	97.9079	-0.0024855
785	0.089204	97.9079	-0.0027108
786	0.089666	97.9079	-0.0028396
787	0.089788	97.9083	-0.0024972
788	0.08985	97.9028	-0.0024843
789	0.09037	97.9028	-0.0024843
790	0.090165	97.9028	-0.0024864
791	0.090521	97.9028	-0.0027351
792	0.09084	97.9028	-0.0029793
793	0.091289	97.9028	-0.0028939
794	0.091638	97.9053	-0.0025123
795	0.091505	97.9053	-0.002478
796	0.091377	97.9053	-0.0019405
797	0.091924	97.9053	-0.0014934
798	0.091774	97.9078	-0.0016729
799	0.091745	97.9077	-0.0021654
800	0.092202	97.9104	-0.0025819
801	0.092216	97.9104	-0.0029591
802	0.092326	97.9104	-0.0029812
803	0.092819	97.9104	-0.0029812
804	0.092703	97.9104	-0.0029812
805	0.093012	97.9105	-0.0029812
806	0.093114	97.913	-0.0029812
807	0.093633	97.913	-0.002868
808	0.093502	97.913	-0.0018774
809	0.093306	97.913	-0.0014829
810	0.093754	97.913	-0.00087453
811	0.093601	97.913	-0.0004977
812	0.093946	97.913	-0.00049684
813	0.093995	97.913	-0.00048262
814	0.094034	97.913	0.00014106
815	0.094422	97.913	0.00049357
816	0.094383	97.9077	3.9569e-05
817	0.094604	97.9079	-0.00049087
818	0.094497	97.9079	-0.00049687
819	0.095258	97.9079	-0.00049687
820	0.094915	97.9081	-0.00049687
821	0.094895	97.9028	-0.00049687
822	0.095002	97.9028	-0.00049687
823	0.095465	97.9028	-0.00049687
824	0.095427	97.9028	-0.00049703
825	0.095242	97.903	-0.00066049
826	0.095346	97.9053	-0.00098498
827	0.09598	97.9053	-0.00099326
828	0.096258	97.9053	-0.00064973
829	0.096567	97.9053	-9.9367e-05
830	0.09672	97.9053	-0.00086765
831	0.096712	97.9053	-0.00099374
832	0.097033	97.9053	-0.00099376
833	0.096922	97.9053	-0.00099376
834	0.097452	97.9053	-0.00099376
835	0.097748	97.9053	-0.00099376
836	0.098173	97.9053	-0.00099376
837	0.09843	97.907	-0.00098148
838	0.098351	97.9079	-0.00036836
839	0.098531	97.9079	-7.1997e-07
840	0.099022	97.9079	-1.4645e-08
841	0.099213	97.9079	-9.0255e-09
842	0.099303	97.9079	0.00010006
843	0.099445	97.9079	0.00086818
844	0.098994	97.9079	0.00094909
845	0.09938	97.9079	0.00094547
846	0.099233	97.9079	0.00099374
847	0.0998	97.9104	0.00099375
848	0.099819	97.9104	0.00091064
849	0.099697	97.9104	0.00052525
850	0.10036	97.9104	0.00023789
851	0.10014	97.9104	1.6017e-06
852	0.10078	97.9104	1.4661e-08
853	0.10095	97.9104	1.8441e-08
854	0.10109	97.9104	4.2357e-05
855	0.10154	97.9104	0.00043297
856	0.10166	97.9104	0.00041424
857	0.10161	97.9104	0.00048054
858	0.10232	97.9104	0.00049683
859	0.10235	97.9132	0.00060541
860	0.10258	97.913	0.00097318
861	0.10288	97.913	0.00099372
862	0.10283	97.913	0.00099371
863	0.10319	97.913	0.00099371
864	0.10302	97.913	0.00099371
865	0.10347	97.913	0.00099373
866	0.10329	97.9129	0.0011135
867	0.10349	97.9075	0.0018953
868	0.10359	97.9079	0.0019874
869	0.10406	97.9079	0.001985
870	0.10419	97.9079	0.0015505
871	0.10428	97.9079	0.0016501
872	0.10475	97.9079	0.001987
873	0.1046	97.9079	0.0019874
874	0.10467	97.9079	0.0019874
875	0.10506	97.9079	0.0019773
876	0.10609	97.9079	0.0016429
877	0.10668	97.9079	0.0014906
878	0.10702	97.9079	0.0014906
879	0.10715	97.9079	0.0014906
880	0.1081	97.9083	0.0014906
881	0.10879	97.9028	0.0014906
882	0.10901	97.9028	0.0014906
883	0.10932	97.9028	0.0014906
884	0.10984	97.9028	0.0014906
885	0.11	97.9028	0.0014906
886	0.11001	97.9028	0.0014906
887	0.11049	97.9028	0.0014553
888	0.11091	97.9028	0.0010657
889	0.11068	97.9028	0.00091169
890	0.11067	97.9028	0.00012668
891	0.11084	97.9028	1.9001e-08
892	0.11089	97.9028	-2.6008e-11
893	0.11108	97.9038	3.3865e-14
894	0.11114	97.9079	1.3487e-13
895	0.11127	97.9076	-9.8209e-11
896	0.11175	97.9104	-3.1974e-08
897	0.11152	97.9104	-0.00027855
898	0.11196	97.9104	-0.0009695
899	0.11215	97.9104	-0.00099373
900	0.11259	97.9104	-0.00098249
901	0.11284	97.9104	-0.00067825
902	0.11293	97.9104	-0.00092662
903	0.11282	97.9104	-0.0010386
904	0.11299	97.9104	-0.0014326
905	0.11376	97.9116	-0.0014912
906	0.11455	97.913	-0.0016971
907	0.11426	97.9157	-0.0019833
908	0.11431	97.9155	-0.0019875
909	0.11467	97.9155	-0.0021252
910	0.11469	97.9181	-0.0024718
911	0.11459	97.918	-0.0024843
912	0.11469	97.918	-0.0024843
913	0.11451	97.918	-0.0024843
914	0.11521	97.918	-0.0024843
915	0.11533	97.918	-0.0024843
916	0.11519	97.918	-0.0024398
917	0.11517	97.918	-0.0016753
918	0.11567	97.918	-0.0010053
919	0.11586	97.918	-0.00099373
920	0.11533	97.9179	-0.00099373
921	0.1154	97.9129	-0.00099373
922	0.1164	97.913	-0.00098039
923	0.11651	97.913	-0.00035468
924	0.11657	97.913	-5.337e-07
925	0.11673	97.913	1.042e-10
926	0.11698	97.913	-1.3167e-11
927	0.11726	97.913	2.827e-09
928	0.11749	97.913	0.00013165
929	0.11764	97.913	0.00051124
930	0.1175	97.913	0.00057554
931	0.1177	97.913	0.0013552
932	0.11732	97.913	0.001398
933	0.1176	97.913	0.0018699
934	0.11759	97.913	0.0019874
935	0.11768	97.913	0.0019875
936	0.11773	97.913	0.0019875
937	0.11751	97.913	0.0019875
938	0.11719	97.913	0.0019875
939	0.11681	97.913	0.0019875
940	0.11621	97.9102	0.0019875
941	0.11544	97.9079	0.0019875
942	0.11512	97.9079	0.0019875
943	0.11461	97.9079	0.0019051
944	0.11386	97.9079	0.0011424
945	0.11349	97.9079	0.0010177
946	0.11301	97.9079	0.0013923
947	0.1134	97.9079	0.0014906
948	0.1132	97.9052	0.0014906
949	0.11332	97.9053	0.0014906
950	0.11341	97.9053	0.0014906
951	0.11308	97.9054	0.0014906
952	0.11346	97.908	0.0016404
953	0.11364	97.9053	0.0024138
954	0.11389	97.9054	0.0024843
955	0.11488	97.9028	0.0024511
956	0.11574	97.9028	0.0020648
957	0.11613	97.9003	0.0019016
958	0.11635	97.9003	0.0015196
959	0.11714	97.9003	0.0014906
960	0.11784	97.9003	0.0013959
961	0.11813	97.9003	0.0010189
962	0.11871	97.9003	0.00099373
963	0.11949	97.9003	0.00099373
964	0.11914	97.9003	0.00099322
965	0.12002	97.9003	0.00079875
966	0.12094	97.9003	0.00050215
967	0.12112	97.9	0.0006048
968	0.12116	97.9028	0.0013905
969	0.12183	97.9028	0.0014906
970	0.12253	97.9028	0.0014927
971	0.12267	97.9028	0.0019307
972	0.12306	97.9028	0.0024778
973	0.12354	97.9028	0.0024843
974	0.12354	97.9079	0.0024843
975	0.12385	97.9079	0.0024843
976	0.12496	97.9079	0.0024843
977	0.12526	97.9079	0.0024843
978	0.12594	97.9079	0.0024845
979	0.12606	97.9089	0.0026587
980	0.12645	97.9104	0.0029741
981	0.12667	97.9104	0.0029812
982	0.12705	97.9104	0.0029812
983	0.12759	97.9071	0.0029812
984	0.12792	97.913	0.0029812
985	0.12818	97.913	0.0029812
986	0.12898	97.913	0.0029812
987	0.12824	97.913	0.0029811
988	0.12845	97.913	0.0028355
989	0.12949	97.913	0.0025054
990	0.12993	97.913	0.0028899
991	0.13045	97.913	0.0034774
992	0.13063	97.913	0.0034366
993	0.131	97.913	0.0030278
994	0.1313	97.913	0.0026049
995	0.13125	97.913	0.0020867
996	0.13138	97.9124	0.0014998
997	0.13131	97.918	0.0014906
998	0.1321	97.918	0.0016243
999	0.13282	97.918	0.0019743
1000	0.1325	97.918	0.0019875
1001	0.13369	97.918	0.0019771
1002	0.13335	97.918	0.0016755
1003	0.13349	97.9235	0.0019159
1004	0.13332	97.9231	0.002029
1005	0.13375	97.9231	0.002421
1006	0.13448	97.9231	0.0024848
1007	0.13476	97.9231	0.0026801
1008	0.13466	97.9231	0.0029762
1009	0.13466	97.9231	0.0029812
1010	0.13478	97.9231	0.0029812
1011	0.1346	97.9231	0.0029812
1012	0.13503	97.9231	0.0029812
1013	0.13479	97.9231	0.0029812
1014	0.13532	97.9231	0.0029812
1015	0.13526	97.9231	0.0029812
1016	0.13482	97.9206	0.0029812
1017	0.13546	97.9206	0.0029435
1018	0.13498	97.9261	0.0025535
1019	0.13519	97.9257	0.0024844
1020	0.13508	97.9257	0.0024847
1021	0.13547	97.9257	0.0026723
1022	0.13569	97.9257	0.0029755
1023	0.13634	97.9257	0.0029712
1024	0.13616	97.9257	0.0023792
1025	0.13589	97.9257	0.0019885
1026	0.13657	97.9257	0.0017349
1027	0.13651	97.9257	0.0010246
1028	0.13658	97.9257	0.00099373
1029	0.13623	97.9256	0.00095161
1030	0.1365	97.9282	0.00094335
1031	0.13728	97.9282	0.00099372
1032	0.13787	97.9282	0.00099383
1033	0.13821	97.9282	0.0010951
1034	0.13833	97.9282	0.00098577
1035	0.13916	97.9282	0.00099372
1036	0.14061	97.9282	0.00099373
1037	0.14161	97.9282	0.00099371
1038	0.14055	97.9282	0.0011004
1039	0.14115	97.9257	0.0014702
1040	0.14084	97.9254	0.0016066
1041	0.14075	97.9285	0.00197
1042	0.14067	97.9257	0.0019875
1043	0.14088	97.9237	0.0019875
1044	0.14022	97.9233	0.0019875
1045	0.1401	97.9206	0.0019892
1046	0.14102	97.9155	0.0021685
1047	0.14133	97.9155	0.0016448
1048	0.14156	97.9155	0.0014906
1049	0.14156	97.9155	0.0014906
1050	0.14207	97.9155	0.0014906
1051	0.14254	97.9155	0.0014906
1052	0.14233	97.9155	0.0014906
1053	0.14328	97.9155	0.00127
1054	0.14318	97.9155	0.0007662
1055	0.14297	97.9155	0.0014553
1056	0.14308	97.9155	0.0014926
1057	0.14334	97.9155	0.0019282
1058	0.14314	97.9155	0.0020248
1059	0.14352	97.9155	0.0014964
1060	0.1435	97.9155	0.0014906
1061	0.14381	97.9155	0.0014906
1062	0.14384	97.9155	0.0014906
1063	0.14376	97.9155	0.0014906
1064	0.14316	97.9155	0.0014906
1065	0.144	97.9155	0.0014938
1066	0.14422	97.9155	0.0017672
1067	0.14491	97.9155	0.0019865
1068	0.14456	97.9155	0.0017686
1069	0.14505	97.9155	0.0010327
1070	0.14554	97.9155	0.00099372
1071	0.14535	97.9155	0.00099373
1072	0.14615	97.918	0.00099373
1073	0.14601	97.918	0.00099373
1074	0.14582	97.918	0.00093849
1075	0.14649	97.918	0.00017446
1076	0.14617	97.918	0.00030493
1077	0.14644	97.913	0.00097402
1078	0.14686	97.913	0.00099371
1079	0.1474	97.913	0.00099063
1080	0.14819	97.9158	0.00071755
1081	0.14768	97.9155	0.00049787
1082	0.1483	97.9155	0.00049686
1083	0.14831	97.9155	0.00049686
1084	0.14878	97.9152	0.00049114
1085	0.149	97.918	0.00018576
1086	0.1494	97.918	5.1137e-05
1087	0.14969	97.918	0.00074217
1088	0.15038	97.918	0.0006998
1089	0.15071	97.9206	0.00080556
1090	0.15133	97.9206	0.0013755
1091	0.15077	97.9231	0.0010192
1092	0.15081	97.9231	0.00095083
1093	0.15052	97.9231	0.0010872
1094	0.15119	97.9231	0.0015098
1095	0.15067	97.9231	0.001935
1096	0.15142	97.9232	0.0025632
1097	0.15183	97.9257	0.0029797
1098	0.15227	97.9257	0.0029812
1099	0.15264	97.9257	0.0029812
1100	0.15266	97.9257	0.0029812
